# Supplementary material for: Longitudinal metabarcode analysis of karst bacterioplankton microbiomes provide evidence of epikarst to cave transport and community succession
Source: PeerJ journal article supplement (doi:10.7717/peerj.10757), 2021-03-08
Supplement: Sup_Fig_2_-_cave_versus_outside_each_site_-_marked.pdf [file Sup_Fig_2_-_cave_versus_outside_each_site_-_marked.pdf]

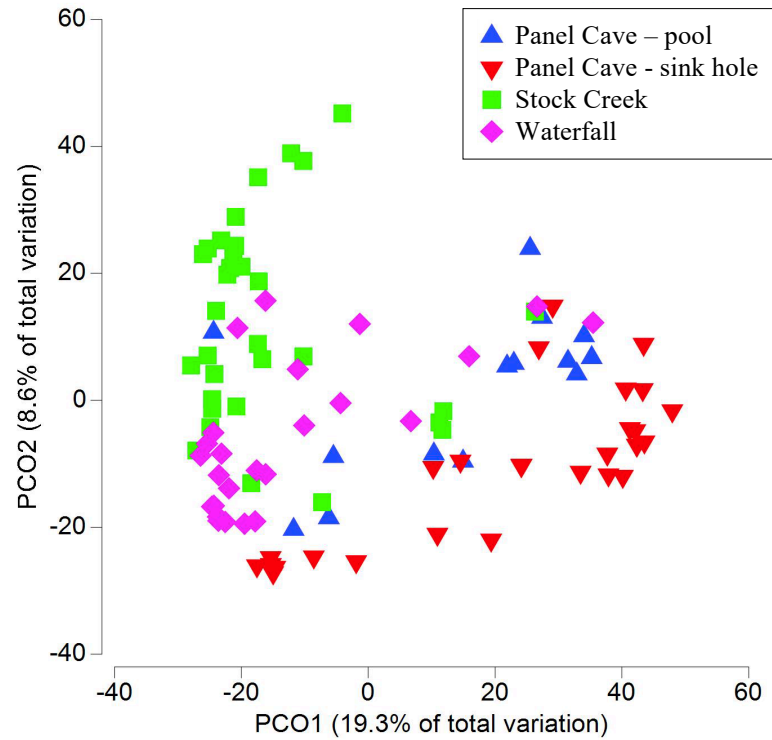

Supplemental Figure 2. PCoA plot of samples collected from Panel Cave and surface sites
