# Supplementary material for: Longitudinal metabarcode analysis of karst bacterioplankton microbiomes provide evidence of epikarst to cave transport and community succession
Source: PeerJ journal article supplement (doi:10.7717/peerj.10757), 2021-03-08
Supplement: Sup_Fig_3_-_Richness_and_Diversity_-_all.pdf [file Sup_Fig_3_-_Richness_and_Diversity_-_all.pdf]

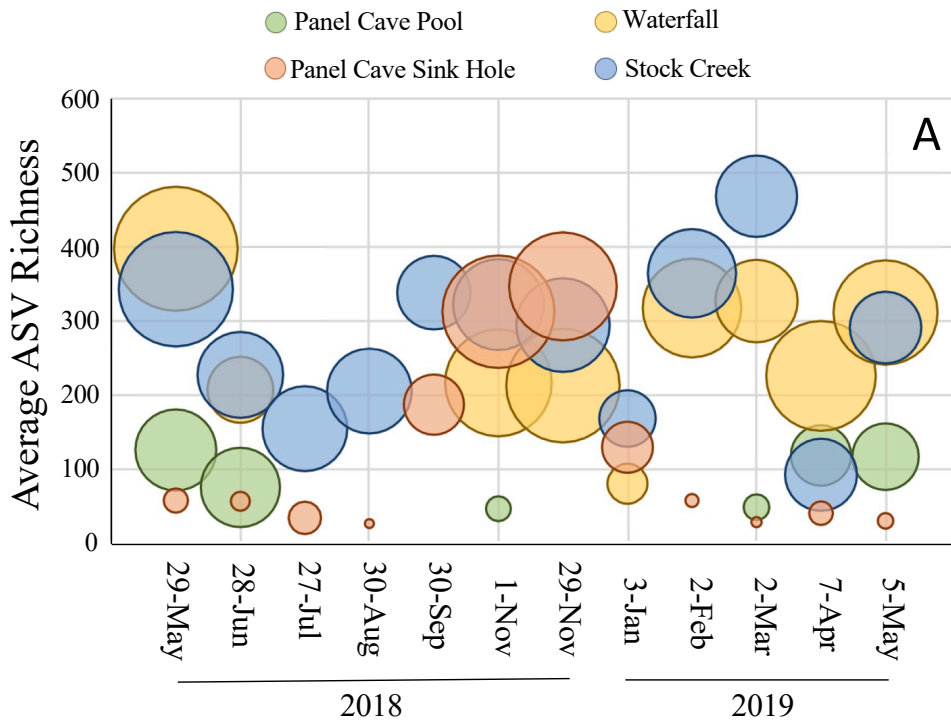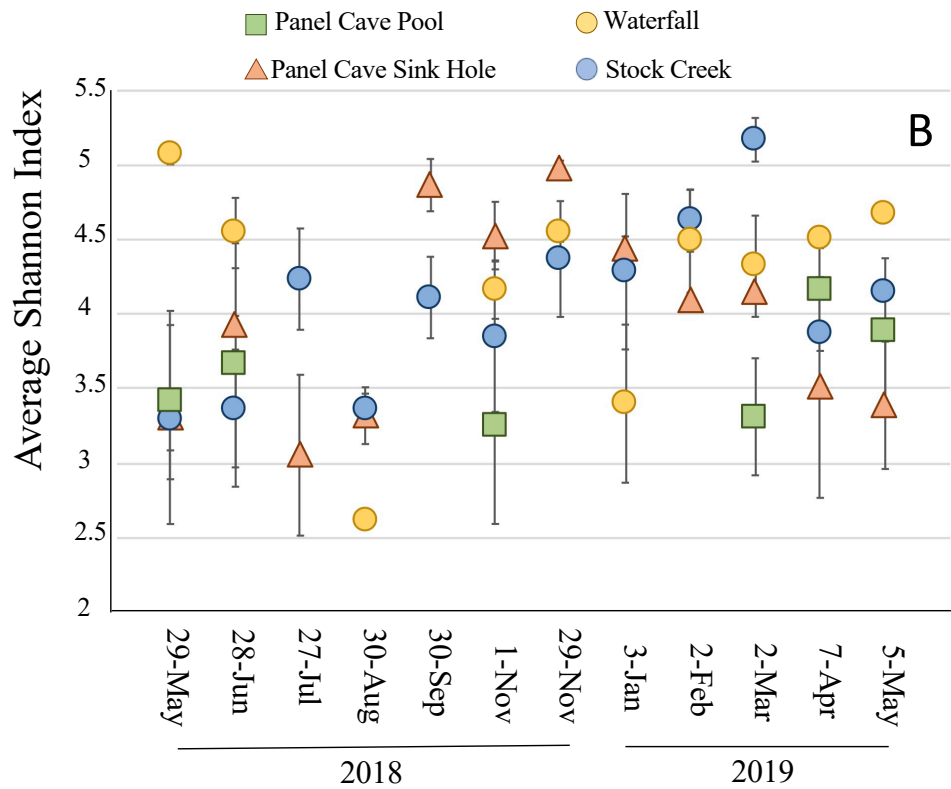

Supplemental Figure 3. (A) Bubble plot of the average ASV richness and the average total number of prokaryotic reads collected from each site at each timepoint. The y-axis represents the average ASV richness, bubble sizes represent the average number of reads, and the x-axis represents sample times. (B) The average calculated Shannon Indexes with standard errors for each for each site and time.
