# Supplementary material for: Longitudinal metabarcode analysis of karst bacterioplankton microbiomes provide evidence of epikarst to cave transport and community succession
Source: PeerJ. 2021 Mar 8;9:e10757. doi: 10.7717/peerj.10757 (PMC7950216; doi:10.7717/peerj.10757)
Supplement: Supplemental Information 5 [file peerj-09-10757-s005.xlsx]

## Sheet: Cave Unique Taxa
Supplemental Table 2: Cave Unique Taxa Summary
	Panel Cave - Sinkhole													Panel Cave - Pool
	2018-05-29	2018-06-28	2018-07-27	2018-08-03	2018-09-30	2018-11-01	2018-11-29	2019-01-03	2019-02-02	2019-03-02	2019-04-07	2019-05-05		2018-05-29	2018-06-28	2018-07-27	2018-08-03	2018-09-30	2018-11-01	2018-11-29	2019-01-03	2019-02-02	2019-03-02	2019-04-07	2019-05-05
k__Archaea_p__[Parvarchaeota]_c__[Parvarchaea]_NA_NA_NA_NA	0	0	0	0	0	0	7	0	0	0	0	0		0	0	0	0	0	0	0	0	0	0	0	0
k__Archaea_p__[Parvarchaeota]_c__[Parvarchaea]_o__WCHD3 30_f___g___s__	0	0	0	0	0	0	0	0	0	0	0	0		0	0	0	0	0	0	0	0	0	0	0	0
k__Archaea_p__Crenarchaeota_c__Thaumarchaeota_o__AK31_f___g___s__	0	0	0	0	0	0	0	0	0	0	0	0		0	0	0	0	0	0	0	0	0	0	7	0
k__Archaea_p__Euryarchaeota_NA_NA_NA_NA_NA	0	0	0	0	0	0	7	0	0	0	0	0		25	0	0	0	0	0	0	0	0	0	0	0
k__Bacteria_p__Acidobacteria_c__[Chloracidobacteria]_o__RB41_NA_NA_NA	0	0	0	0	0	0	15	0	0	0	0	0		0	0	0	0	0	0	0	0	0	0	0	0
k__Bacteria_p__Acidobacteria_c__Acidobacteria 6_o__CCU21_f___g___s__	0	0	0	0	0	0	0	0	0	0	0	0		0	0	0	0	0	0	0	0	0	0	0	0
k__Bacteria_p__Acidobacteria_c__Acidobacteria 6_o__iii1 15_f___g___s__	0	0	0	0	0	0	0	0	0	0	0	0		0	0	0	0	0	0	0	0	0	0	0	0
k__Bacteria_p__Acidobacteria_c__Acidobacteria 6_o__iii1 15_f__mb2424_g__ _s__	0	0	0	0	0	0	0	0	0	0	0	0		0	0	0	0	0	0	0	0	0	0	0	0
k__Bacteria_p__Acidobacteria_c__Acidobacteria 6_o__iii1 15_f__RB40_g___s__	0	0	0	0	0	0	0	0	0	0	0	0		0	0	0	0	0	0	0	0	0	0	0	0
k__Bacteria_p__Acidobacteria_c__Acidobacteria6_o__iii115_NA_NA_NA	0	0	0	0	0	0	6	0	0	0	0	0		0	0	0	0	0	0	0	0	0	0	0	0
k__Bacteria_p__Acidobacteria_c__Holophagae_o__Holophagales_f___g___s__	0	0	0	0	0	0	0	0	0	0	0	0		5	0	0	0	0	0	0	0	0	0	0	0
k__Bacteria_p__Actinobacteria_c__Acidimicrobiia_o__Acidimicrobiales_f___ g___s__	0	0	0	0	0	0	0	0	0	0	0	0		0	0	0	0	0	0	0	0	0	0	0	0
k__Bacteria_p__Actinobacteria_c__Actinobacteria_o__Actinomycetales_f___g ___s__	0	0	0	0	0	0	0	0	0	0	0	0		0	0	0	0	0	0	0	0	0	0	0	0
k__Bacteria_p__Actinobacteria_c__Actinobacteria_o__Actinomycetales_f__ACK M1_g___s__	0	0	0	0	0	0	0	0	0	0	0	0		0	0	0	0	0	0	0	0	0	0	0	0
k__Bacteria_p__Actinobacteria_c__Actinobacteria_o__Actinomycetales_f__ACK-M1_g___s__	0	0	0	0	0	0	0	0	0	0	0	0		0	0	0	0	0	0	0	0	0	0	0	0
k__Bacteria_p__Actinobacteria_c__Actinobacteria_o__Actinomycetales_f__Actinosynnemataceae_g__Lentzea_s__albidocapillata	0	0	0	0	0	0	0	0	12	0	0	0		0	0	0	0	0	0	0	0	0	0	0	0
k__Bacteria_p__Actinobacteria_c__Actinobacteria_o__Actinomycetales_f__AK M1_g___s__	0	0	0	0	0	0	0	0	0	0	0	0		0	0	0	0	0	0	0	0	0	0	0	0
k__Bacteria_p__Actinobacteria_c__Actinobacteria_o__Actinomycetales_f__Bogoriellaceae_g__Georgenia_s__	0	0	0	0	0	0	0	0	0	0	0	0		0	0	0	0	0	0	0	0	0	0	0	0
k__Bacteria_p__Actinobacteria_c__Actinobacteria_o__Actinomycetales_f__Brevibacteriaceae_g__Brevibacterium_s__aureum	0	0	0	0	0	0	0	0	0	0	0	0		4	0	0	0	0	0	0	0	0	0	45	0
k__Bacteria_p__Actinobacteria_c__Actinobacteria_o__Actinomycetales_f__Cellulomonadaceae_g___s__	0	0	0	0	0	0	99	0	0	0	0	0		0	0	0	0	0	0	0	0	0	0	0	0
k__Bacteria_p__Actinobacteria_c__Actinobacteria_o__Actinomycetales_f__Co rynebacteriaceae_g__Corynebacterium_s__	0	0	0	0	0	0	0	0	0	0	0	0		0	0	0	0	0	0	0	0	0	0	0	0
k__Bacteria_p__Actinobacteria_c__Actinobacteria_o__Actinomycetales_f__Dermacoccaceae_g__Dermacoccus_s__	0	0	0	0	0	0	0	0	0	0	0	0		0	0	0	0	0	0	0	0	0	0	9	0
k__Bacteria_p__Actinobacteria_c__Actinobacteria_o__Actinomycetales_f__Dietziaceae_g__Dietzia_s__	0	0	0	0	0	0	0	0	0	0	0	0		0	0	0	0	0	0	0	0	0	0	0	0
k__Bacteria_p__Actinobacteria_c__Actinobacteria_o__Actinomycetales_f__Fr ankiaceae_g___s__	0	0	0	0	0	0	0	0	0	0	0	0		0	0	0	0	0	0	0	0	0	0	0	0
k__Bacteria_p__Actinobacteria_c__Actinobacteria_o__Actinomycetales_f__Microbacteriaceae_g__Candidatus Aquiluna_s__rubra	0	0	0	0	0	0	0	0	0	0	0	0		0	0	0	0	0	0	0	0	0	0	0	0
k__Bacteria_p__Actinobacteria_c__Actinobacteria_o__Actinomycetales_f__Microbacteriaceae_g__Candidatus-Rhodoluna_s__	0	0	0	0	0	0	0	0	0	0	0	0		0	0	0	0	0	0	0	0	0	0	0	0
k__Bacteria_p__Actinobacteria_c__Actinobacteria_o__Actinomycetales_f__Micrococcaceae_g__Kocuria_s__	0	0	0	0	0	0	0	0	0	0	0	0		0	0	0	0	0	0	0	0	0	0	22	0
k__Bacteria_p__Actinobacteria_c__Actinobacteria_o__Actinomycetales_f__Micrococcaceae_g__Microbispora_s__rosea	0	0	0	0	0	0	0	0	0	0	0	0		0	0	0	0	0	6	0	0	0	0	60	0
k__Bacteria_p__Actinobacteria_c__Actinobacteria_o__Actinomycetales_f__Micrococcaceae_g__Rothia_s__mucilaginosa	0	0	0	0	0	0	0	0	0	0	0	0		0	0	0	0	0	0	0	0	0	0	0	0
k__Bacteria_p__Actinobacteria_c__Actinobacteria_o__Actinomycetales_f__Nocardiaceae_g__Rhodococcus_s__ruber	0	0	0	0	0	0	0	0	0	0	0	0		0	0	0	0	0	0	0	0	0	0	0	0
k__Bacteria_p__Actinobacteria_c__Actinobacteria_o__Actinomycetales_f__Nocardioidaceae_g__Kribbella_s__	0	0	0	0	0	0	37	0	0	0	0	0		0	0	0	0	0	0	0	0	0	0	0	0
k__Bacteria_p__Actinobacteria_c__Actinobacteria_o__Actinomycetales_f__Pseudonocardiaceae_g__Pseudonocardia_s__halophobica	0	0	0	0	0	0	22	0	0	0	0	0		0	0	0	0	0	0	0	0	0	0	0	0
k__Bacteria_p__Actinobacteria_c__Actinobacteria_o__Actinomycetales_f__Sporichthyaceae_g__Sporichthya_s__	0	0	0	0	13	0	0	0	0	0	0	0		0	0	0	0	0	0	0	0	0	0	0	0
k__Bacteria_p__Actinobacteria_c__Actinobacteria_o__Actinomycetales_f__Streptosporangiaceae_g__Nonomuraea_s__	0	0	0	0	0	3	0	0	0	0	0	0		0	0	0	0	0	0	0	0	0	0	0	0
k__Bacteria_p__Actinobacteria_c__Actinobacteria_o__Actinomycetales_f__Streptosporangiaceae_g__Nonomuraea_s__roseoviolacea	0	0	0	0	0	0	0	0	0	0	0	0		0	0	0	0	0	0	0	0	0	0	0	0
k__Bacteria_p__Actinobacteria_c__Actinobacteria_o__Actinomycetales_f__Thermomonosporaceae_g__Actinomadura_s__alba	0	0	0	7	0	0	0	0	0	0	0	0		0	0	0	0	0	0	0	0	0	0	0	0
k__Bacteria_p__Actinobacteria_c__Actinobacteria_o__Actinomycetales_NA_NA _NA	0	0	0	0	0	0	0	0	0	0	0	0		0	0	0	0	0	0	0	0	0	0	0	0
k__Bacteria_p__Actinobacteria_c__Actinobacteria_o__Bifidobacteriales_f___g___s__	0	0	0	0	0	16	0	0	0	0	0	0		0	0	0	0	0	0	0	0	0	0	0	0
k__Bacteria_p__Actinobacteria_c__KISTJJY010_o___f___g___s__	0	0	0	0	0	7	3	0	0	0	0	0		0	0	0	0	0	0	0	0	0	0	0	0
k__Bacteria_p__Actinobacteria_c__Nitriliruptoria_o__Nitriliruptorales_f__Nitriliruptoraceae_g___s__	0	0	0	0	0	0	24	0	0	0	0	0		0	0	0	0	0	0	0	0	0	0	0	0
k__Bacteria_p__Actinobacteria_c__Thermoleophilia_o__Solirubrobacterales_ f___g___s__	0	0	0	0	0	0	0	0	0	0	0	0		0	0	0	0	0	0	0	0	0	0	0	0
k__Bacteria_p__Armatimonadetes_c__[Fimbriimonadia]_o__[Fimbriimonadales]_NA_NA_NA	0	0	0	0	0	3	0	0	0	0	0	0		0	0	0	0	0	0	0	0	0	0	0	0
k__Bacteria_p__Bacteroidetes_c__[Rhodothermi]_o__[Rhodothermales]_f__[Balneolaceae]_g__KSA1_s__	0	0	0	0	4	0	0	0	0	0	0	0		0	0	0	0	0	0	0	0	0	0	0	0
k__Bacteria_p__Bacteroidetes_c__[Saprospirae]_o__[Saprospirales]_f___g__ _s__	0	0	0	0	0	0	0	0	0	0	0	0		0	0	0	0	0	0	0	0	0	0	0	0
k__Bacteria_p__Bacteroidetes_c__[Saprospirae]_o__[Saprospirales]_f__Sapr ospiraceae_g___s__	0	0	0	0	0	0	0	0	0	0	0	0		0	0	0	0	0	0	0	0	0	0	0	0
k__Bacteria_p__Bacteroidetes_c__[Saprospirae]_o__[Saprospirales]_f__Saprospiraceae_g__Lewinella_NA	0	0	0	0	0	0	5	0	0	0	0	0		0	0	0	0	0	0	0	0	0	0	0	0
k__Bacteria_p__Bacteroidetes_c__Bacteroidia_o__Bacteroidales_f__[Barnesiellaceae]_g___s__	0	0	49	0	0	0	0	0	0	0	0	0		0	0	0	0	0	0	0	0	0	0	0	0
k__Bacteria_p__Bacteroidetes_c__Bacteroidia_o__Bacteroidales_f__Bacteroidaceae_g__Bacteroides_s__acidifaciens	0	0	56	0	0	0	0	0	0	0	14	0		0	0	0	0	0	0	0	0	0	0	0	0
k__Bacteria_p__Bacteroidetes_c__Bacteroidia_o__Bacteroidales_f__Porphyromonadaceae_g__Porphyromonas_s__	0	0	0	0	16	0	0	0	0	0	0	0		0	0	0	0	0	0	0	0	0	0	0	0
k__Bacteria_p__Bacteroidetes_c__Bacteroidia_o__Bacteroidales_f__Porphyromonadaceae_g__Porphyromonas_s__endodontalis	0	0	0	0	0	0	0	0	0	0	0	0		0	0	0	0	0	0	0	0	0	0	0	0
k__Bacteria_p__Bacteroidetes_c__Flavobacteriia_o__Flavobacteriales_f__Cr_yomorphaceae_g__Fluviicola	0	0	0	0	0	0	0	0	0	0	0	0		0	0	0	0	0	0	0	0	0	0	0	0
k__Bacteria_p__Bacteroidetes_c__Flavobacteriia_o__Flavobacteriales_f__Fl_avobacteriaceae_g__Flavobacterium	0	0	0	0	0	0	0	0	0	0	0	0		0	0	0	0	0	0	0	0	0	0	0	0
k__Bacteria_p__Bacteroidetes_c__Flavobacteriia_o__Flavobacteriales_f__Flavobacteriaceae_g__Krokinobacter_s__genikus	0	0	0	0	0	0	0	0	0	0	0	0		0	0	0	0	0	20	0	0	0	0	0	0
k__Bacteria_p__Bacteroidetes_c__Flavobacteriia_o__Flavobacteriales_f__Flavobacteriaceae_g__Lutimonas_s__	0	0	0	0	0	0	0	0	0	0	0	0		0	0	0	0	0	34	0	0	0	0	0	0
k__Bacteria_p__Bacteroidetes_c__Flavobacteriia_o__Flavobacteriales_f__Flavobacteriaceae_g__Maribacter_s__	0	0	0	0	0	0	0	0	0	0	0	0		0	0	0	0	0	11	0	0	0	0	0	0
k__Bacteria_p__Bacteroidetes_c__Flavobacteriia_o__Flavobacteriales_f__Flavobacteriaceae_g__Psychroserpens_s__	0	0	0	0	0	0	0	0	0	0	0	0		0	0	0	0	0	12	0	0	0	0	0	0
k__Bacteria_p__Bacteroidetes_c__Flavobacteriia_o__Flavobacteriales_f__Flavobacteriaceae_g__Tenacibaculum_s__	0	0	0	0	0	0	0	0	0	0	0	0		0	0	0	0	0	147	0	0	0	0	0	0
k__Bacteria_p__Bacteroidetes_c__Sphingobacteriia_o__Sphingobacteriales_f ___g___s__	0	0	0	0	0	0	0	0	0	0	0	0		0	0	0	0	0	0	0	0	0	0	0	0
k__Bacteria_p__Bacteroidetes_c__Sphingobacteriia_o__Sphingobacteriales_f __Sphingobacteriaceae_g__Parapedobacter_s__	0	0	0	0	0	0	0	0	0	0	0	0		0	0	0	0	0	0	0	0	0	0	0	0
k__Bacteria_p__Bacteroidetes_c__Sphingobacteriia_o__Sphingobacteriales_f __Sphingobacteriaceae_g__Sphingobacterium_s__mizutaii	0	0	0	0	0	0	0	0	0	0	0	0		0	0	0	0	0	0	0	0	0	0	0	0
k__Bacteria_p__Bacteroidetes_c__Sphingobacteriia_o__Sphingobacteriales_N A_NA_NA	0	0	0	0	0	0	0	0	0	0	0	0		0	0	0	0	0	0	0	0	0	0	0	0
k__Bacteria_p__BRC1_NA_NA_NA_NA_NA	0	0	0	0	0	0	2	0	0	0	0	0		0	0	0	0	0	0	0	0	0	0	0	0
k__Bacteria_p__Caldithrix_c__Caldithrixae_o__Caldithrixales_NA_NA_NA	0	0	0	0	0	0	4	0	0	0	0	0		0	0	0	0	0	0	0	0	0	0	0	0
k__Bacteria_p__Chlamydiae_c__Chlamydiia_o__Chlamydiales_f__Chlamydiaceae _NA_NA	0	0	0	0	0	0	0	0	0	0	0	0		0	0	0	0	0	0	0	0	0	0	0	0
k__Bacteria_p__Chlamydiae_c__Chlamydiia_o__Chlamydiales_f__Criblamydiace ae_NA_NA	0	0	0	0	0	0	0	0	0	0	0	0		0	0	0	0	0	0	0	0	0	0	0	0
k__Bacteria_p__Chlamydiae_c__Chlamydiia_o__Chlamydiales_f__Criblamydiaceae_NA_NA	16	0	0	0	0	0	0	0	0	0	0	0		0	0	0	0	0	0	0	0	0	0	0	0
k__Bacteria_p__Chloroflexi_c__Anaerolineae_o__Anaerolineales_f__Anaerolinaceae_g__Anaerolinea_NA	0	0	0	0	18	0	0	0	0	0	0	0		0	0	0	0	0	0	0	0	0	0	0	0
k__Bacteria_p__Chloroflexi_c__Anaerolineae_o__Anaerolineales_f__Anaerolinaceae_NA_NA	0	0	0	0	0	0	76	0	0	0	0	0		0	0	0	0	0	0	0	0	0	0	0	0
k__Bacteria_p__Chloroflexi_c__Anaerolineae_o__WCHB1 50_f___g___s__	0	0	0	0	0	0	0	0	0	0	0	0		0	0	0	0	0	0	0	0	0	0	0	0
k__Bacteria_p__Chloroflexi_c__Dehalococcoidetes_o__Dehalococcoidales_f__Dehalococcoidaceae_NA_NA	0	0	0	0	0	0	17	0	0	0	0	0		0	0	0	0	0	0	0	0	0	0	0	0
k__Bacteria_p__Chloroflexi_c__Ktedonobacteria_o__Ktedonobacterales_f__Ktedonobacteraceae_g__FFCH10602_s__	0	0	0	0	0	0	5	0	0	0	0	0		0	0	0	0	0	0	0	0	0	0	0	0
k__Bacteria_p__Chloroflexi_c__SHA26_o___f___g___s__	0	0	0	0	5	0	0	0	0	0	0	0		0	0	0	0	0	0	0	0	0	0	0	0
k__Bacteria_p__Chloroflexi_c__Thermomicrobia_o__JG30 KF CM45_f___g___s__	0	0	0	0	0	0	0	0	0	0	0	0		0	0	0	0	0	0	0	0	0	0	0	0
k__Bacteria_p__Cyanobacteria_c__ML635J 21_o___f___g___s__	0	0	0	0	0	0	0	0	0	0	0	0		0	0	0	0	0	0	0	0	0	0	0	0
k__Bacteria_p__Cyanobacteria_c__Oscillatoriophycideae_o__Chroococcales_f __Xenococcaceae_g___s__	0	0	0	0	0	0	0	0	0	0	0	0		0	0	0	0	0	0	0	0	0	0	0	0
k__Bacteria_p__Deferribacteres_c__Deferribacteres_o__Deferribacterales_f__Deferribacteraceae_g__Mucispirillum_s__schaedleri	0	0	7	0	0	0	0	0	0	0	0	0		0	0	0	0	0	0	0	0	0	0	0	0
k__Bacteria_p__Elusimicrobia_c__Elusimicrobia_o__Elusimicrobiales_NA_NA_NA	0	0	0	0	0	0	0	0	0	0	0	0		21	21	0	0	0	0	0	0	0	0	0	0
k__Bacteria_p__Elusimicrobia_c__Elusimicrobia_o__MVP 88_f___g___s__	0	0	0	0	0	0	0	0	0	0	0	0		0	0	0	0	0	0	0	0	0	0	0	0
k__Bacteria_p__Firmicutes_c__Bacilli_o__Bacillales_f__Bacillaceae_g__Bacillus_s__muralis	0	0	0	0	0	0	0	0	0	0	0	0		0	0	0	0	0	0	0	0	0	0	0	0
k__Bacteria_p__Firmicutes_c__Bacilli_o__Bacillales_f__Bacillaceae_g__Bacillus_s__thermoamylovorans	0	0	0	0	0	0	0	0	0	0	0	0		0	0	0	0	0	0	0	0	0	9	0	0
k__Bacteria_p__Firmicutes_c__Bacilli_o__Bacillales_f__Planococcaceae_g__Bacillus_s__thermoalkalophilus	0	0	0	0	0	0	0	0	0	0	0	0		0	0	0	0	0	0	0	0	0	0	0	0
k__Bacteria_p__Firmicutes_c__Bacilli_o__Bacillales_f__Planococcaceae_g__Paenisporosarcina_s__	0	0	0	0	0	21	0	0	0	0	0	0		0	0	0	0	0	0	0	0	0	0	0	19
k__Bacteria_p__Firmicutes_c__Bacilli_o__Bacillales_f__Staphylococcaceae_ g__Jeotgalicoccus_s__psychrophilus	0	0	0	0	0	0	0	0	0	0	0	0		0	0	0	0	0	0	0	0	0	0	0	0
k__Bacteria_p__Firmicutes_c__Bacilli_o__Bacillales_f__Staphylococcaceae_g__Macrococcus_NA	0	0	0	0	0	0	0	0	0	0	0	0		0	0	0	0	0	0	0	0	0	0	142	0
k__Bacteria_p__Firmicutes_c__Bacilli_o__Bacillales_f__Staphylococcaceae_g__Macrococcus_s__caseolyticus	0	0	0	0	0	0	45	0	0	0	0	0		0	0	0	0	0	0	0	0	0	0	0	0
k__Bacteria_p__Firmicutes_c__Bacilli_o__Bacillales_f__Staphylococcaceae_g__Staphylococcus_NA	0	0	0	0	0	0	0	23	0	0	0	0		0	0	0	0	0	0	0	0	0	0	0	0
k__Bacteria_p__Firmicutes_c__Bacilli_o__Bacillales_f__Staphylococcaceae_NA_NA	0	0	0	0	6	0	0	0	0	0	0	0		0	0	0	0	0	0	0	0	0	0	0	0
k__Bacteria_p__Firmicutes_c__Bacilli_o__Lactobacillales_f__Carnobacteriaceae_g__Granulicatella_s__	0	0	0	0	0	0	0	0	0	0	0	0		20	20	0	0	0	0	0	0	0	0	0	0
k__Bacteria_p__Firmicutes_c__Bacilli_o__Lactobacillales_f__Lactobacillaceae_g___s__	0	0	0	0	0	0	0	0	0	0	0	0		7	7	0	0	0	7	0	0	0	0	156	0
k__Bacteria_p__Firmicutes_c__Bacilli_o__Lactobacillales_f__Lactobacillaceae_g__Lactobacillus_s__ruminis	0	0	46	0	0	0	0	0	0	0	0	0		0	0	0	0	0	0	0	0	0	0	0	0
k__Bacteria_p__Firmicutes_c__Clostridia_o__Clostridiales_f__Christensene llaceae_g___s__	0	0	0	0	0	0	0	0	0	0	0	0		0	0	0	0	0	0	0	0	0	0	0	0
k__Bacteria_p__Firmicutes_c__Clostridia_o__Clostridiales_f__Clostridiaceae_g__Clostridium_s__acetobutylicum	0	0	0	0	0	13	0	0	0	0	0	0		0	0	0	0	0	0	0	0	0	0	0	0
k__Bacteria_p__Firmicutes_c__Clostridia_o__Clostridiales_f__Lachnospirac eae_g__Clostridium_NA	0	0	0	0	0	0	0	0	0	0	0	0		0	0	0	0	0	0	0	0	0	0	0	0
k__Bacteria_p__Firmicutes_c__Clostridia_o__Clostridiales_f__Lachnospiraceae_g__[Ruminococcus]_s__gnavus	0	0	39	0	0	0	0	0	0	0	0	0		0	0	0	0	0	0	0	0	0	0	0	0
k__Bacteria_p__Firmicutes_c__Clostridia_o__Clostridiales_f__Lachnospiraceae_g__Butyrivibrio_s__	0	0	8	0	0	0	0	0	0	0	0	0		0	0	0	0	0	0	0	0	0	0	0	0
k__Bacteria_p__Firmicutes_c__Clostridia_o__Clostridiales_f__Lachnospiraceae_g__Moryella_s__	0	0	11	0	0	0	0	0	0	0	0	0		0	0	0	0	0	0	0	0	0	0	0	0
k__Bacteria_p__Firmicutes_c__Clostridia_o__Clostridiales_f__Peptococcaceae_g__rc44_s__	0	0	48	0	0	0	0	0	0	0	0	0		0	0	0	0	0	0	0	0	0	0	0	0
k__Bacteria_p__Firmicutes_c__Clostridia_o__Clostridiales_f__Ruminococcaceae_g__Butyricicoccus_s__pullicaecorum	0	0	10	0	0	0	0	0	0	0	0	0		0	0	0	0	0	0	0	0	0	0	0	0
k__Bacteria_p__Firmicutes_c__Erysipelotrichi_o__Erysipelotrichales_f__Erysipelotrichaceae_g__Clostridium_s__saccharogumia	0	0	2	0	0	0	0	0	0	0	0	0		0	0	0	0	0	0	0	0	0	0	0	0
k__Bacteria_p__Fusobacteria_c__Fusobacteriia_o__Fusobacteriales_f__Fusobacteriaceae_g__Fusobacterium_s__	0	0	0	0	0	0	0	0	0	0	0	0		0	0	0	0	0	7	0	0	0	0	0	0
k__Bacteria_p__Fusobacteria_c__Fusobacteriia_o__Fusobacteriales_f__Fusobacteriaceae_g__Psychrilyobacter_s__	0	0	0	0	0	0	0	0	0	0	0	0		0	0	0	0	0	107	0	0	0	0	0	0
k__Bacteria_p__Gemmatimonadetes_c__Gemm 1_o___f___g___s__	0	0	0	0	0	0	0	0	0	0	0	0		0	0	0	0	0	0	0	0	0	0	0	0
k__Bacteria_p__Gemmatimonadetes_c__Gemmatimonadetes_o__Ellin5290_f___g__ _s__	0	0	0	0	0	0	0	0	0	0	0	0		0	0	0	0	0	0	0	0	0	0	0	0
k__Bacteria_p__GN02_c__GKS2 174_o___f___g___s__	0	0	0	0	0	0	0	0	0	0	0	0		0	0	0	0	0	0	0	0	0	0	0	0
k__Bacteria_p__GN04_c__5bav_B12_o___f___g___s__	0	0	0	0	0	17	0	0	0	0	0	0		0	0	0	0	0	0	0	0	0	0	0	0
k__Bacteria_p__Kazan3B28_c___o___f___g___s__	0	0	0	0	0	0	0	0	0	0	0	0		0	0	0	0	0	0	0	0	0	0	6	0
k__Bacteria_p__Lentisphaerae_c__[Lentisphaeria]_o__Lentisphaerales_f___g___s__	0	0	0	0	0	0	0	0	0	0	0	0		0	0	0	0	0	27	0	0	0	0	0	0
k__Bacteria_p__NC10_c__1224_o___f___g___s__	0	0	0	0	0	0	0	0	0	0	0	0		0	0	0	0	0	0	0	0	0	0	44	0
k__Bacteria_p__Nitrospirae_c__Nitrospira_o__Nitrospirales_f__[Thermodesulfovibrionaceae]_g__HB118_s__	0	0	0	0	8	3	0	0	0	0	0	0		0	0	0	0	0	0	0	0	0	0	0	0
k__Bacteria_p__Nitrospirae_c__Nitrospira_o__Nitrospirales_f__03196A21_g__s__	0	0	0	0	0	0	15	0	0	0	0	0		0	0	0	0	0	0	0	0	0	0	0	0
k__Bacteria_p__Nitrospirae_c__Nitrospira_o__Nitrospirales_f__Nitrospirac eae_g__Nitrospira_s__	0	0	0	0	0	0	0	0	0	0	0	0		0	0	0	0	0	0	0	0	0	0	0	0
k__Bacteria_p__OD1_c__Mb NB09_o___f___g___s__	0	0	0	0	0	0	0	0	0	0	0	0		0	0	0	0	0	0	0	0	0	0	0	0
k__Bacteria_p__OP11_c__OP111_o___f___g___s__	0	0	0	0	0	0	3	0	0	0	0	0		0	0	0	0	0	0	0	0	0	0	0	0
k__Bacteria_p__OP3_c__BD4 9_o___f___g___s__	0	0	0	0	0	0	0	0	0	0	0	0		0	0	0	0	0	0	0	0	0	0	0	0
k__Bacteria_p__OP3_c__PBS 25_o___f___g___s__	0	0	0	0	0	0	0	0	0	0	0	0		0	0	0	0	0	0	0	0	0	0	0	0
k__Bacteria_p__Planctomycetes_c__C6_o__MVS 107_f___g___s__	0	0	0	0	0	0	0	0	0	0	0	0		0	0	0	0	0	0	0	0	0	0	0	0
k__Bacteria_p__Planctomycetes_c__OM190_o__CL500 15_f___g___s__	0	0	0	0	0	0	0	0	0	0	0	0		0	0	0	0	0	0	0	0	0	0	0	0
k__Bacteria_p__Planctomycetes_c__Phycisphaerae_o__CPla3_f___g___s__	0	0	0	3	6	0	0	0	0	0	0	0		0	0	0	0	0	0	0	0	0	0	0	0
k__Bacteria_p__Planctomycetes_c__Phycisphaerae_o__mle1 8_f___g___s__	0	0	0	0	0	0	0	0	0	0	0	0		0	0	0	0	0	0	0	0	0	0	0	0
k__Bacteria_p__Planctomycetes_c__Phycisphaerae_o__Phycisphaerales_f___g_ __s__	0	0	0	0	0	0	0	0	0	0	0	0		0	0	0	0	0	0	0	0	0	0	0	0
k__Bacteria_p__Planctomycetes_c__Planctomycetia_o___f___g___s__	0	0	0	0	0	0	0	0	0	0	0	0		0	0	0	0	0	0	0	0	0	0	0	4
k__Bacteria_p__Planctomycetes_c__Planctomycetia_o__Gemmatales_f__Gemmata ceae_g___s__	0	0	0	0	0	0	0	0	0	0	0	0		0	0	0	0	0	0	0	0	0	0	0	0
k__Bacteria_p__Planctomycetes_c__Planctomycetia_o__Gemmatales_f__Gemmataeae_g___s__	0	0	0	0	0	36	0	0	0	0	0	0		0	0	0	0	0	0	0	0	0	0	0	0
k__Bacteria_p__Planctomycetes_c__Planctomycetia_o__Gemmatales_f__Isospha eraceae_g___s__	0	0	0	0	0	0	0	0	0	0	0	0		0	0	0	0	0	0	0	0	0	0	0	0
k__Bacteria_p__Proteobacteria_c__Alphaproteobacteria_o__BD7 3_f___g___s__	0	0	0	0	0	0	0	0	0	0	0	0		0	0	0	0	0	0	0	0	0	0	0	0
k__Bacteria_p__Proteobacteria_c__Alphaproteobacteria_o__Caulobacterales_ f__Caulobacteraceae_g__Phenylobacterium_s__	0	0	0	0	0	0	0	0	0	0	0	0		0	0	0	0	0	0	0	0	0	0	0	0
k__Bacteria_p__Proteobacteria_c__Alphaproteobacteria_o__Ellin329_f___g__ _s__	0	0	0	0	0	0	0	0	0	0	0	0		0	0	0	0	0	0	0	0	0	0	0	0
k__Bacteria_p__Proteobacteria_c__Alphaproteobacteria_o__Rhizobiales_f___ g___s__	0	0	0	0	0	0	0	0	0	0	0	0		0	0	0	0	0	0	0	0	0	0	0	0
k__Bacteria_p__Proteobacteria_c__Alphaproteobacteria_o__Rhizobiales_f__H yphomicrobiaceae_g__Hyphomicrobium_NA	0	0	0	0	0	0	0	0	0	0	0	0		0	0	0	0	0	0	0	0	0	0	0	0
k__Bacteria_p__Proteobacteria_c__Alphaproteobacteria_o__Rhizobiales_f__Hyphomicrobiaceae_g__Hyphomicrobium_s__zavarzinii	0	0	0	0	0	0	17	0	0	0	0	0		0	0	0	0	0	0	0	0	0	0	0	0
k__Bacteria_p__Proteobacteria_c__Alphaproteobacteria_o__Rhizobiales_NA_N A_NA	0	0	0	0	0	0	0	0	0	0	0	0		0	0	0	0	0	0	0	0	0	0	0	0
k__Bacteria_p__Proteobacteria_c__Alphaproteobacteria_o__Rhodobacterales_ f__Hyphomonadaceae_g___s__	0	0	0	0	0	0	0	0	0	0	0	0		0	0	0	0	0	0	0	0	0	0	0	0
k__Bacteria_p__Proteobacteria_c__Alphaproteobacteria_o__Rhodobacterales_ f__Rhodobacteraceae_g__Amaricoccus_s__	0	0	0	0	0	0	0	0	0	0	0	0		0	0	0	0	0	0	0	0	0	0	0	0
k__Bacteria_p__Proteobacteria_c__Alphaproteobacteria_o__Rhodobacterales_ NA_NA_NA	0	0	0	0	0	0	0	0	0	0	0	0		0	0	0	0	0	0	0	0	0	0	0	0
k__Bacteria_p__Proteobacteria_c__Alphaproteobacteria_o__Rhodobacterales_f__Rhodobacteraceae_g__Octadecabacter_s__	0	0	0	0	0	0	0	0	0	0	0	0		0	0	0	0	0	37	0	0	0	0	0	0
k__Bacteria_p__Proteobacteria_c__Alphaproteobacteria_o__Rhodospirillales _f__Acetobacteraceae_g___s__	0	0	0	0	0	0	0	0	0	0	0	0		0	0	0	0	0	0	0	0	0	0	0	0
k__Bacteria_p__Proteobacteria_c__Alphaproteobacteria_o__Rhodospirillales _f__Acetobacteraceae_g__Roseococcus_s__	0	0	0	0	0	0	0	0	0	0	0	0		0	0	0	0	0	0	0	0	0	0	0	0
k__Bacteria_p__Proteobacteria_c__Alphaproteobacteria_o__Rhodospirillales _f__Rhodospirillaceae_g___s__	0	0	0	0	0	0	0	0	0	0	0	0		0	0	0	0	0	0	0	0	0	0	0	0
k__Bacteria_p__Proteobacteria_c__Alphaproteobacteria_o__Rhodospirillales _f__Rhodospirillaceae_g__Azospirillum_s__irakense	0	0	0	0	0	0	0	0	0	0	0	0		0	0	0	0	0	0	0	0	0	0	0	0
k__Bacteria_p__Proteobacteria_c__Alphaproteobacteria_o__Rhodospirillales _f__Rhodospirillaceae_g__Magnetospirillum_s__	0	0	0	0	0	0	0	0	0	0	0	0		0	0	0	0	0	0	0	0	0	0	0	0
k__Bacteria_p__Proteobacteria_c__Alphaproteobacteria_o__Rhodospirillales _f__Rhodospirillaceae_NA_NA	0	0	0	0	0	0	0	0	0	0	0	0		0	0	0	0	0	0	0	0	0	0	0	0
k__Bacteria_p__Proteobacteria_c__Alphaproteobacteria_o__Rhodospirillales_f__Rhodospirillaceae_g__Inquilinus_NA	0	0	0	0	0	0	0	0	0	0	0	0		0	0	0	0	0	0	0	0	0	0	0	0
k__Bacteria_p__Proteobacteria_c__Alphaproteobacteria_o__Rickettsiales_f_ __g___s__	0	0	0	0	0	0	0	0	0	0	0	0		0	0	0	0	0	0	0	0	0	0	0	0
k__Bacteria_p__Proteobacteria_c__Alphaproteobacteria_o__Rickettsiales_f_ _mitochondria_NA_NA	0	0	0	0	0	0	0	0	0	0	0	0		0	0	0	0	0	0	0	0	0	0	0	0
k__Bacteria_p__Proteobacteria_c__Alphaproteobacteria_o__Rickettsiales_f_ _Rickettsiaceae_g___s__	0	0	0	0	0	0	0	0	0	0	0	0		0	0	0	0	0	0	0	0	0	0	0	0
k__Bacteria_p__Proteobacteria_c__Alphaproteobacteria_o__Rickettsiales_f_ _Rickettsiaceae_g__Rickettsia_s__	0	0	0	0	0	0	0	0	0	0	0	0		0	0	0	0	0	0	0	0	0	0	0	0
k__Bacteria_p__Proteobacteria_c__Alphaproteobacteria_o__Rickettsiales_f__g___s__	0	0	0	0	13	0	0	0	0	0	0	0		0	0	0	0	0	0	0	0	0	0	0	0
k__Bacteria_p__Proteobacteria_c__Alphaproteobacteria_o__Rickettsiales_NA _NA_NA	0	0	0	0	0	0	0	0	0	0	0	0		0	0	0	0	0	0	0	0	0	0	0	0
k__Bacteria_p__Proteobacteria_c__Alphaproteobacteria_o__Sphingomonadales _f__Erythrobacteraceae_g___s__	0	0	0	0	0	0	0	0	0	0	0	0		0	0	0	0	0	0	0	0	0	0	0	0
k__Bacteria_p__Proteobacteria_c__Alphaproteobacteria_o__Sphingomonadales _f__Erythrobacteraceae_NA_NA	0	0	0	0	0	0	0	0	0	0	0	0		0	0	0	0	0	0	0	0	0	0	0	0
k__Bacteria_p__Proteobacteria_c__Alphaproteobacteria_o__Sphingomonadales _f__Sphingomonadaceae_g___s__	0	0	0	0	0	0	0	0	0	0	0	0		0	0	0	0	0	0	0	0	0	0	0	0
k__Bacteria_p__Proteobacteria_c__Alphaproteobacteria_o__Sphingomonadales _f__Sphingomonadaceae_g__Novosphingobium_s__	0	0	0	0	0	0	0	0	0	0	0	0		0	0	0	0	0	0	0	0	0	0	0	0
k__Bacteria_p__Proteobacteria_c__Alphaproteobacteria_o__Sphingomonadales _f__Sphingomonadaceae_g__Sphingopyxis_s__alaskensis	0	0	0	0	0	0	0	0	0	0	0	0		0	0	0	0	0	0	0	0	0	0	0	0
k__Bacteria_p__Proteobacteria_c__Alphaproteobacteria_o__Sphingomonadales _f__Sphingomonadaceae_NA_NA	0	0	0	0	0	0	0	0	0	0	0	0		0	0	0	0	0	0	0	0	0	0	0	0
k__Bacteria_p__Proteobacteria_c__Betaproteobacteria_o__Burkholderiales_f __Comamonadaceae_g___s__	0	0	0	0	0	0	0	0	0	0	0	0		0	0	0	0	0	0	0	0	0	0	0	0
k__Bacteria_p__Proteobacteria_c__Betaproteobacteria_o__Burkholderiales_f __Comamonadaceae_g__Hydrogenophaga_s__	0	0	0	0	0	0	0	0	0	0	0	0		0	0	0	0	0	0	0	0	0	0	0	0
k__Bacteria_p__Proteobacteria_c__Betaproteobacteria_o__Burkholderiales_f __Comamonadaceae_g__Limnohabitans_s__	0	0	0	0	0	0	0	0	0	0	0	0		0	0	0	0	0	0	0	0	0	0	0	0
k__Bacteria_p__Proteobacteria_c__Betaproteobacteria_o__Burkholderiales_f __Comamonadaceae_NA_NA	0	0	0	0	0	0	0	0	0	0	0	0		0	0	0	0	0	0	0	0	0	0	0	0
k__Bacteria_p__Proteobacteria_c__Betaproteobacteria_o__Burkholderiales_f __Oxalobacteraceae_g___s__	0	0	0	0	0	0	0	0	0	0	0	0		0	0	0	0	0	0	0	0	0	0	0	0
k__Bacteria_p__Proteobacteria_c__Betaproteobacteria_o__Burkholderiales_f __Oxalobacteraceae_NA_NA	0	0	0	0	0	0	0	0	0	0	0	0		0	0	0	0	0	0	0	0	0	0	0	0
k__Bacteria_p__Proteobacteria_c__Betaproteobacteria_o__Burkholderiales_f__Comamonadaceae_g__Schlegelella_s__	0	0	0	0	0	0	38	0	0	0	0	0		0	0	0	0	0	0	0	0	0	4	0	0
k__Bacteria_p__Proteobacteria_c__Betaproteobacteria_o__Burkholderiales_f__Oxalobacteraceae_g__Paucimonas_s__lemoignei	0	0	0	0	0	18	0	0	0	0	0	0		0	0	0	0	0	0	0	0	0	0	0	0
k__Bacteria_p__Proteobacteria_c__Betaproteobacteria_o__Ellin6067_f___g__ _s__	0	0	0	0	0	0	0	0	0	0	0	0		0	0	0	0	0	0	0	0	0	0	0	0
k__Bacteria_p__Proteobacteria_c__Betaproteobacteria_o__Methylophilales_f __Methylophilaceae_NA_NA	0	0	0	0	0	0	0	0	0	0	0	0		0	0	0	0	0	0	0	0	0	0	0	0
k__Bacteria_p__Proteobacteria_c__Betaproteobacteria_o__Neisseriales_f__Neisseriaceae_g__Eikenella_s__	0	0	0	0	0	0	7	0	0	0	0	0		0	0	0	0	0	0	0	0	0	0	0	0
k__Bacteria_p__Proteobacteria_c__Betaproteobacteria_o__Neisseriales_f__Neisseriaceae_g__Neisseria_s__	0	0	0	0	0	0	0	0	0	0	0	0		0	0	0	0	0	0	0	0	0	0	0	0
k__Bacteria_p__Proteobacteria_c__Betaproteobacteria_o__Neisseriales_f__Neisseriaceae_g__Neisseria_s__subflava	0	0	0	0	0	0	17	0	0	0	0	0		0	0	0	0	0	0	0	0	0	0	0	0
k__Bacteria_p__Proteobacteria_c__Betaproteobacteria_o__Procabacteriales_ f__Procabacteriaceae_g___s__	0	0	0	0	0	0	0	0	0	0	0	0		0	0	0	0	0	0	0	0	0	0	0	0
k__Bacteria_p__Proteobacteria_c__Betaproteobacteria_o__Rhodocyclales_f__ Rhodocyclaceae_g__C39_s__	0	0	0	0	0	0	0	0	0	0	0	0		0	0	0	0	0	0	0	0	0	0	0	0
k__Bacteria_p__Proteobacteria_c__Betaproteobacteria_o__Rhodocyclales_f__Rhodocyclaceae_g__Petrobacter_s__succinatimandens	0	0	0	0	0	0	0	0	0	0	0	0		0	0	0	0	0	0	0	0	0	4	0	0
k__Bacteria_p__Proteobacteria_c__Betaproteobacteria_o__SC I 84_f___g___s__	0	0	0	0	0	0	0	0	0	0	0	0		0	0	0	0	0	0	0	0	0	0	0	0
k__Bacteria_p__Proteobacteria_c__Deltaproteobacteria_o__Bdellovibrionale s_f__Bacteriovoracaceae_g__Peredibacter_s__starrii	0	0	0	0	0	0	0	0	0	0	0	0		0	0	0	0	0	0	0	0	0	0	0	0
k__Bacteria_p__Proteobacteria_c__Deltaproteobacteria_o__Bdellovibrionale s_f__Bdellovibrionaceae_g__Bdellovibrio_s__	0	0	0	0	0	0	0	0	0	0	0	0		0	0	0	0	0	0	0	0	0	0	0	0
k__Bacteria_p__Proteobacteria_c__Deltaproteobacteria_o__Desulfovibrionales_f__Desulfomicrobiaceae_g__Desulfomicrobium_s__	0	0	0	0	0	0	0	0	0	0	0	0		35	35	0	0	0	0	0	0	0	0	0	0
k__Bacteria_p__Proteobacteria_c__Deltaproteobacteria_o__Desulfuromonadaes_f__Geobacteraceae_g__Geobacter_s__	0	0	0	0	0	0	25	0	0	0	0	0		0	0	0	0	0	0	0	0	0	0	0	0
k__Bacteria_p__Proteobacteria_c__Deltaproteobacteria_o__Desulfuromonadales_f__Desulfuromonadaceae_g___s__	0	0	0	0	0	0	14	0	0	0	0	0		0	0	0	0	0	0	0	0	0	0	0	0
k__Bacteria_p__Proteobacteria_c__Deltaproteobacteria_o__Myxococcales_f__ _g___s__	0	0	0	0	0	0	0	0	0	0	0	0		0	0	0	0	0	0	0	0	0	0	0	0
k__Bacteria_p__Proteobacteria_c__Deltaproteobacteria_o__Myxococcales_f__ Haliangiaceae_g___s__	0	0	0	0	0	0	0	0	0	0	0	0		0	0	0	0	0	0	0	0	0	0	0	0
k__Bacteria_p__Proteobacteria_c__Deltaproteobacteria_o__Myxococcales_f__ OM27_g___s__	0	0	0	0	0	0	0	0	0	0	0	0		0	0	0	0	0	0	0	0	0	0	0	0
k__Bacteria_p__Proteobacteria_c__Deltaproteobacteria_o__Myxococcales_f__Cystobacteraceae_NA_NA	0	0	0	0	11	0	0	0	0	0	0	0		0	0	0	0	0	0	0	0	0	0	0	0
k__Bacteria_p__Proteobacteria_c__Deltaproteobacteria_o__Myxococcales_f__Haliangiaceae_g__Haliangium_s__	0	0	0	0	0	0	0	0	0	0	0	0		0	0	0	0	0	0	0	0	0	0	0	44
k__Bacteria_p__Proteobacteria_c__Deltaproteobacteria_o__Myxococcales_N_NA_NA	0	0	0	0	22	0	0	0	0	0	0	0		0	0	0	0	0	0	0	0	0	0	0	0
k__Bacteria_p__Proteobacteria_c__Deltaproteobacteria_o__NB1 j_f___g___s__	0	0	0	0	0	0	0	0	0	0	0	0		0	0	0	0	0	0	0	0	0	0	0	0
k__Bacteria_p__Proteobacteria_c__Deltaproteobacteria_o__NB1 j_f__JTB38_g___s__	0	0	0	0	0	0	0	0	0	0	0	0		0	0	0	0	0	0	0	0	0	0	0	0
k__Bacteria_p__Proteobacteria_c__Deltaproteobacteria_o__NKB15_f___g___s__	38	0	0	0	0	0	0	0	0	0	0	0		0	0	0	0	0	0	0	0	0	0	0	38
k__Bacteria_p__Proteobacteria_c__Deltaproteobacteria_o__Spirobacillales_ f___g___s__	0	0	0	0	0	0	0	0	0	0	0	0		0	0	0	0	0	0	0	0	0	0	0	0
k__Bacteria_p__Proteobacteria_c__Deltaproteobacteria_o__Syntrophobactera les_f__Syntrophobacteraceae_g___s__	0	0	0	0	0	0	0	0	0	0	0	0		0	0	0	0	0	0	0	0	0	0	0	0
k__Bacteria_p__Proteobacteria_c__Epsilonproteobacteria_NA_NA_NA_NA	0	0	0	0	0	0	28	0	0	0	0	0		15	0	0	0	0	0	0	0	0	0	0	0
k__Bacteria_p__Proteobacteria_c__Gammaproteobacteria_o__Alteromonadales_ f__125ds10_g___s__	0	0	0	0	0	0	0	0	0	0	0	0		0	0	0	0	0	0	0	0	0	0	0	0
k__Bacteria_p__Proteobacteria_c__Gammaproteobacteria_o__Alteromonadales_ f__Alteromonadaceae_g___s__	0	0	0	0	0	0	0	0	0	0	0	0		0	0	0	0	0	0	0	0	0	0	0	0
k__Bacteria_p__Proteobacteria_c__Gammaproteobacteria_o__Alteromonadales_ f__Alteromonadaceae_NA_NA	0	0	0	0	0	0	0	0	0	0	0	0		0	0	0	0	0	0	0	0	0	0	0	0
k__Bacteria_p__Proteobacteria_c__Gammaproteobacteria_o__Alteromonadales_ NA_NA_NA	0	0	0	0	0	0	0	0	0	0	0	0		0	0	0	0	0	0	0	0	0	0	0	0
k__Bacteria_p__Proteobacteria_c__Gammaproteobacteria_o__Alteromonadales_f__Alteromonadaceae_g__nsmpVI18_s__	0	0	0	0	0	0	0	0	0	0	0	0		0	0	0	0	0	3	0	0	0	0	0	0
k__Bacteria_p__Proteobacteria_c__Gammaproteobacteria_o__Alteromonadales_f__Colwelliaceae_g___s__	0	0	0	0	0	0	0	0	0	0	0	0		0	0	0	0	0	27	0	0	0	0	0	0
k__Bacteria_p__Proteobacteria_c__Gammaproteobacteria_o__Alteromonadales_f__Psychromonadaceae_g__Psychromonas_s__	0	0	0	0	0	0	0	0	0	0	0	0		0	0	0	0	0	97	0	0	0	0	0	0
k__Bacteria_p__Proteobacteria_c__Gammaproteobacteria_o__Alteromonadales_f__Shewanellaceae_g__Shewanella_s__benthica	0	0	0	0	0	0	0	0	0	0	0	0		0	0	0	0	0	191	0	0	0	0	0	0
k__Bacteria_p__Proteobacteria_c__Gammaproteobacteria_o__Chromatiales_f__ _g___s__	0	0	0	0	0	0	0	0	0	0	0	0		0	0	0	0	0	0	0	0	0	0	0	0
k__Bacteria_p__Proteobacteria_c__Gammaproteobacteria_o__Enterobacteriales_f__Enterobacteriaceae_g___s__	0	0	0	0	0	0	6	0	0	0	0	0		0	0	0	0	0	0	0	0	0	0	0	0
k__Bacteria_p__Proteobacteria_c__Gammaproteobacteria_o__Enterobacteriales_f__Enterobacteriaceae_g__Pantoea_s__ananatis	0	0	0	0	0	0	20	0	0	0	0	0		0	0	0	0	0	0	0	0	0	0	0	0
k__Bacteria_p__Proteobacteria_c__Gammaproteobacteria_o__HTCC2188_f__HTCC 2089_g___s__	0	0	0	0	0	0	0	0	0	0	0	0		0	0	0	0	0	0	0	0	0	0	0	0
k__Bacteria_p__Proteobacteria_c__Gammaproteobacteria_o__Legionellales_f_ __g___s__	0	0	0	0	0	0	0	0	0	0	0	0		0	0	0	0	0	0	0	0	0	0	0	0
k__Bacteria_p__Proteobacteria_c__Gammaproteobacteria_o__Legionellales_f_ _Coxiellaceae_g___s__	0	0	0	0	0	0	0	0	0	0	0	0		0	0	0	0	0	0	0	0	0	0	0	0
k__Bacteria_p__Proteobacteria_c__Gammaproteobacteria_o__Legionellales_f_ _Legionellaceae_g__Legionella_NA	0	0	0	0	0	0	0	0	0	0	0	0		0	0	0	0	0	0	0	0	0	0	0	0
k__Bacteria_p__Proteobacteria_c__Gammaproteobacteria_o__Legionellales_f__Legionellaceae_g__Legionella_s__pneumophila	0	0	0	0	0	16	0	0	0	0	0	0		0	0	0	0	0	0	0	0	0	0	0	0
k__Bacteria_p__Proteobacteria_c__Gammaproteobacteria_o__Legionellales_NA _NA_NA	0	0	0	0	0	0	0	0	0	0	0	0		0	0	0	0	0	0	0	0	0	0	0	0
k__Bacteria_p__Proteobacteria_c__Gammaproteobacteria_o__Methylococcales_ f__Crenotrichaceae_g__Crenothrix_s__	0	0	0	0	0	0	0	0	0	0	0	0		0	0	0	0	0	0	0	0	0	0	0	0
k__Bacteria_p__Proteobacteria_c__Gammaproteobacteria_o__Oceanospirillale s_NA_NA_NA	0	0	0	0	0	0	0	0	0	0	0	0		0	0	0	0	0	0	0	0	0	0	0	0
k__Bacteria_p__Proteobacteria_c__Gammaproteobacteria_o__Oceanospirillales_f__Halomonadaceae_NA_NA	0	0	0	0	0	0	0	0	0	0	0	0		24	24	0	0	0	0	0	0	0	0	0	0
k__Bacteria_p__Proteobacteria_c__Gammaproteobacteria_o__Pasteurellales_f__Pasteurellaceae_g__Aggregatibacter_s__	0	0	0	0	0	0	0	0	0	0	0	0		0	0	0	0	0	14	0	0	0	0	0	0
k__Bacteria_p__Proteobacteria_c__Gammaproteobacteria_o__Pasteurellales_f__Pasteurellaceae_g__Haemophilus_s__	0	0	0	0	0	0	85	0	0	0	0	0		0	0	0	0	0	0	0	0	0	0	0	0
k__Bacteria_p__Proteobacteria_c__Gammaproteobacteria_o__Pseudomonadales_ f__Moraxellaceae_g__Perlucidibaca_s__	0	0	0	0	0	0	0	0	0	0	0	0		0	0	0	0	0	0	0	0	0	0	0	0
k__Bacteria_p__Proteobacteria_c__Gammaproteobacteria_o__Pseudomonadales_f__Moraxellaceae_g__Acinetobacter_s__rhizosphaera_	0	0	0	0	0	0	0	0	0	0	0	0		0	0	0	0	0	0	0	0	0	0	0	0
k__Bacteria_p__Proteobacteria_c__Gammaproteobacteria_o__Pseudomonadales_f__Moraxellaceae_g__Psychrobacter_s__pulmonis	0	3	0	0	0	0	0	0	0	0	0	0		0	0	0	0	0	0	0	0	0	0	0	0
k__Bacteria_p__Proteobacteria_c__Gammaproteobacteria_o__Thiohalorhabdales_f___g___s__	0	0	0	0	0	0	0	0	0	0	0	0		0	0	0	0	0	59	0	0	0	0	0	0
k__Bacteria_p__Proteobacteria_c__Gammaproteobacteria_o__Thiotrichales_f_ _Piscirickettsiaceae_g___s__	0	0	0	0	0	0	0	0	0	0	0	0		0	0	0	0	0	0	0	0	0	0	0	0
k__Bacteria_p__Proteobacteria_c__Gammaproteobacteria_o__Thiotrichales_f__Thiotrichaceae_g__Cocleimonas_s__	0	0	0	0	0	0	0	0	0	0	0	0		0	0	0	0	0	25	0	0	0	0	0	0
k__Bacteria_p__Proteobacteria_c__Gammaproteobacteria_o__Vibrionales_f__Pseudoalteromonadaceae_g__Pseudoalteromonas_s__	0	0	0	0	0	0	0	0	0	0	0	0		0	0	0	0	0	68	0	0	0	0	0	0
k__Bacteria_p__Proteobacteria_c__Gammaproteobacteria_o__Vibrionales_f__Vibrionaceae_g___s__	0	0	0	0	0	0	0	0	0	0	0	0		0	0	0	0	0	820	0	0	0	0	0	0
k__Bacteria_p__Proteobacteria_c__Gammaproteobacteria_o__Vibrionales_f__Vibrionaceae_g__Photobacterium_s__	0	0	0	0	0	0	0	0	0	0	0	0		0	0	0	0	0	51	0	0	0	0	0	0
k__Bacteria_p__Proteobacteria_c__Gammaproteobacteria_o__Vibrionales_f__Vibrionaceae_g__Vibrio_s__rumoiensis	0	0	0	0	0	0	0	0	0	0	0	0		0	0	0	0	0	237	0	0	0	0	0	0
k__Bacteria_p__Proteobacteria_c__Gammaproteobacteria_o__Xanthomonadales_ f__Sinobacteraceae_g___s__	0	0	0	0	0	0	0	0	0	0	0	0		0	0	0	0	0	0	0	0	0	0	0	0
k__Bacteria_p__Proteobacteria_c__Gammaproteobacteria_o__Xanthomonadales_ f__Xanthomonadaceae_g___s__	0	0	0	0	0	0	0	0	0	0	0	0		0	0	0	0	0	0	0	0	0	0	0	0
k__Bacteria_p__Proteobacteria_c__Gammaproteobacteria_o__Xanthomonadales_ f__Xanthomonadaceae_g__Arenimonas_s__	0	0	0	0	0	0	0	0	0	0	0	0		0	0	0	0	0	0	0	0	0	0	0	0
k__Bacteria_p__Proteobacteria_c__Gammaproteobacteria_o__Xanthomonadales_ f__Xanthomonadaceae_g__Stenotrophomonas_s__acidaminiphila	0	0	0	0	0	0	0	0	0	0	0	0		0	0	0	0	0	0	0	0	0	0	0	0
k__Bacteria_p__Proteobacteria_c__Gammaproteobacteria_o__Xanthomonadales_f__Xanthomonadaceae_g__Pseudoxanthomonas_s__	0	0	0	0	0	0	0	0	0	0	0	0		0	0	0	0	0	4	0	0	0	0	0	0
k__Bacteria_p__Spirochaetes_c__[Leptospirae]_o__[Leptospirales]_f__Leptospiraceae_g__Leptonema_s__	0	0	0	0	0	0	2	0	0	0	0	0		0	0	0	0	0	0	0	0	0	0	0	0
k__Bacteria_p__Tenericutes_c__RF3_o__ML615J28_f___g___s__	0	0	30	0	0	0	0	0	0	0	0	0		0	0	0	0	0	0	0	0	0	0	0	0
k__Bacteria_p__TM6_c__SJA 4_o___f___g___s__	0	0	0	0	0	0	0	0	0	0	0	0		0	0	0	0	0	0	0	0	0	0	0	0
k__Bacteria_p__TM6_c__SJA4_o__YJF248_f___g___s__	0	0	0	0	6	0	0	0	0	0	0	0		0	0	0	0	0	0	0	0	0	0	0	0
k__Bacteria_p__TM7_c__TM7 1_o___f___g___s__	0	0	0	0	0	0	0	0	0	0	0	0		0	0	0	0	0	0	0	0	0	0	0	0
k__Bacteria_p__TM7_NA_NA_NA_NA_NA	14	0	0	0	0	0	5	0	0	0	0	0		0	0	0	0	0	0	0	0	0	0	0	22
k__Bacteria_p__Verrucomicrobia_c__[Pedosphaerae]_o__[Pedosphaerales]_f__ _g___s__	0	0	0	0	0	0	0	0	0	0	0	0		0	0	0	0	0	0	0	0	0	0	0	0
k__Bacteria_p__Verrucomicrobia_c__[Pedosphaerae]_o__[Pedosphaerales]_f__ auto67_4W_g___s__	0	0	0	0	0	0	0	0	0	0	0	0		0	0	0	0	0	0	0	0	0	0	0	0
k__Bacteria_p__Verrucomicrobia_c__[Pedosphaerae]_o__[Pedosphaerales]_f__R4 41B_g___s__	0	0	0	0	0	0	0	0	0	0	0	0		0	0	0	0	0	0	0	0	0	0	0	0
k__Bacteria_p__Verrucomicrobia_c__[Spartobacteria]_o__[Chthoniobacterales]_f__[Chthoniobacteraceae]_g__OR 59_s__	0	0	0	0	0	0	0	0	0	0	0	0		0	0	0	0	0	0	0	0	0	0	0	0
k__Bacteria_p__Verrucomicrobia_c__Opitutae_o__[Cerasicoccales]_f__[Cerasicoccaceae]_NA_NA	0	0	0	0	0	0	0	0	0	0	0	0		4	0	0	0	0	0	0	0	0	0	0	5
k__Bacteria_p__Verrucomicrobia_c__Verruco 5_o__LD1 PB3_f___g___s__	0	0	0	0	0	0	0	0	0	0	0	0		0	0	0	0	0	0	0	0	0	0	0	0
k__Bacteria_p__Verrucomicrobia_c__Verruco 5_o__WCHB1 41_f___g___s__	0	0	0	0	0	0	0	0	0	0	0	0		0	0	0	0	0	0	0	0	0	0	0	0
k__Bacteria_p__Verrucomicrobia_c__Verrucomicrobiae_o__Verrucomicrobiales _f__Verrucomicrobiaceae_g___s__	0	0	0	0	0	0	0	0	0	0	0	0		0	0	0	0	0	0	0	0	0	0	0	0
k__Bacteria_p__Verrucomicrobia_c__Verrucomicrobiae_o__Verrucomicrobiales _f__Verrucomicrobiaceae_g__Prosthecobacter_s__debontii	0	0	0	0	0	0	0	0	0	0	0	0		0	0	0	0	0	0	0	0	0	0	0	0
k__Bacteria_p__Verrucomicrobia_c__Verrucomicrobiae_o__Verrucomicrobiales _f__Verrucomicrobiaceae_NA_NA	0	0	0	0	0	0	0	0	0	0	0	0		0	0	0	0	0	0	0	0	0	0	0	0
k__Bacteria_p__Verrucomicrobia_c__Verrucomicrobiae_o__Verrucomicrobiales_f__Verrucomicrobiaceae_g__Akkermansia_s__muciniphila	0	0	0	0	0	0	0	0	0	0	0	0		0	0	0	0	0	0	0	0	0	87	0	0
k__Bacteria_p__WS3_c__PRR 12_o__GN03_f___g___s__	0	0	0	0	0	0	0	0	0	0	0	0		0	0	0	0	0	0	0	0	0	0	0	0
k__Bacteria_p__WS3_c__PRR 12_o__Sediment 1_f__PRR 10_g___s__	0	0	0	0	0	0	0	0	0	0	0	0		0	0	0	0	0	0	0	0	0	0	0	0
k__Bacteria_p__WWE1_c__[Cloacamonae]_o__[Cloacamonales]_f__SHA116_g___s__	0	0	0	0	0	0	0	0	0	0	0	0		0	0	0	0	0	0	0	0	0	0	0	0
