# Supplementary material for: Longitudinal metabarcode analysis of karst bacterioplankton microbiomes provide evidence of epikarst to cave transport and community succession
Source: PeerJ. 2021 Mar 8;9:e10757. doi: 10.7717/peerj.10757 (PMC7950216; doi:10.7717/peerj.10757)
Supplement: Supplemental Information 6 [file peerj-09-10757-s006.xlsx]

## Sheet: All Surface Taxa
Supplemental Table 3: All Surface Taxa Summary
	Surface - Stock Creek													Surface - Waterfall
	2018-05-29	2018-06-28	2018-07-27	2018-08-03	2018-09-30	2018-11-01	2018-11-29	2019-01-03	2019-02-02	2019-03-02	2019-04-07	2019-05-05		2018-05-29	2018-06-28	2018-07-27	2018-08-03	2018-09-30	2018-11-01	2018-11-29	2019-01-03	2019-02-02	2019-03-02	2019-04-07	2019-05-05
k__Archaea_NA_NA_NA_NA_NA_NA	0	23	0	0	4	23	16	37	37	34	0	0		8	0	nd	nd	nd	0	8	0	11	0	20	0
k__Archaea_p__[Parvarchaeota]_c__[Micrarchaea]_o__[Micrarchaeles]_f___g___s__	0	0	0	0	16	7	0	114	0	18	0	0		0	0	nd	nd	nd	0	46	0	6	0	5	0
k__Archaea_p__[Parvarchaeota]_c__[Parvarchaea]_o__WCHD330_f___g___s__	5	52	112	6	12	32	76	82	68	50	3	5		318	0	nd	nd	nd	0	0	0	0	0	0	0
k__Archaea_p__[Parvarchaeota]_c__[Parvarchaea]_o__YLA114_f___g___s__	40	199	56	10	124	73	254	78	321	173	3	0		434	48	nd	nd	nd	0	291	69	62	95	378	69
k__Archaea_p__Crenarchaeota_c__MCG_o__B10_f___g___s__	0	0	0	0	0	0	0	0	0	4	0	0		0	0	nd	nd	nd	0	0	0	0	0	0	0
k__Archaea_p__Crenarchaeota_c__MCG_o__pGrfC26_f___g___s__	0	0	15	0	0	0	0	0	0	12	0	0		0	0	nd	nd	nd	0	0	0	0	0	0	0
k__Archaea_p__Crenarchaeota_c__Thaumarchaeota_o__Cenarchaeales_f__Cenarchaeaceae_g___s__	0	0	45	0	0	0	0	0	14	20	0	0		0	0	nd	nd	nd	0	0	0	17	18	0	0
k__Archaea_p__Crenarchaeota_c__Thaumarchaeota_o__Cenarchaeales_f__Cenarchaeaceae_g__Nitrosopumilus_NA	0	0	0	0	0	0	0	0	0	17	0	0		0	0	nd	nd	nd	0	0	0	0	0	0	0
k__Archaea_p__Crenarchaeota_c__Thaumarchaeota_o__Cenarchaeales_f__Cenarchaeaceae_g__Nitrosopumilus_s__	0	0	727	0	9	0	15	0	0	6	0	10		0	0	nd	nd	nd	0	0	0	0	0	0	0
k__Archaea_p__Crenarchaeota_c__Thaumarchaeota_o__Cenarchaeales_f__Cenarchaeaceae_g__Nitrosopumilus_s__pIVWA5	0	0	0	0	0	0	0	0	0	13	0	0		0	0	nd	nd	nd	0	0	0	0	0	0	0
k__Archaea_p__Crenarchaeota_c__Thaumarchaeota_o__Cenarchaeales_f__SAGMAX_g___s__	0	11	10	0	19	0	28	0	0	41	5	0		0	0	nd	nd	nd	0	0	0	0	0	0	0
k__Archaea_p__Crenarchaeota_c__Thaumarchaeota_o__Cenarchaeales_f__SAGMAX_g__Nitrosotalea_s__devanaterra	0	0	0	0	0	27	0	0	0	0	0	0		0	0	nd	nd	nd	0	0	0	0	0	0	0
k__Archaea_p__Crenarchaeota_c__Thaumarchaeota_o__Nitrososphaerales_f__Nitrososphaeraceae_g__CandidatusNitrososphaera_s__	9	0	57	0	8	0	0	34	19	36	0	0		180	0	nd	nd	nd	0	0	0	0	0	0	0
k__Archaea_p__Crenarchaeota_c__Thaumarchaeota_o__Nitrososphaerales_f__Nitrososphaeraceae_g__CandidatusNitrososphaera_s__gargensis	0	0	31	0	0	0	0	0	0	8	0	0		0	0	nd	nd	nd	0	0	0	0	0	0	0
k__Archaea_p__Crenarchaeota_c__Thaumarchaeota_o__Nitrososphaerales_f__Nitrososphaeraceae_g__CandidatusNitrososphaera_s__SCA1145	0	0	5	0	0	0	0	0	24	0	0	0		87	0	nd	nd	nd	0	0	0	0	0	0	0
k__Archaea_p__Crenarchaeota_c__Thaumarchaeota_o__Nitrososphaerales_f__Nitrososphaeraceae_g__CandidatusNitrososphaera_s__SCA1170	0	5	106	0	0	0	0	26	40	36	0	0		62	0	nd	nd	nd	0	0	0	0	0	0	0
k__Archaea_p__Euryarchaeota_c__DSEG_o__104A5_f___g___s__	0	9	0	0	9	0	5	0	0	0	0	0		0	0	nd	nd	nd	0	0	0	0	0	0	0
k__Archaea_p__Euryarchaeota_c__DSEG_o__ArcA07_f___g___s__	0	0	0	0	0	0	0	0	13	0	0	0		0	0	nd	nd	nd	0	0	0	0	0	0	0
k__Archaea_p__Euryarchaeota_c__Methanobacteria_o__Methanobacteriales_f___g___s__	0	0	0	0	0	0	0	0	0	3	0	0		0	0	nd	nd	nd	0	0	0	0	0	0	0
k__Archaea_p__Euryarchaeota_c__Methanobacteria_o__Methanobacteriales_f__Methanobacteriaceae_g___s__	0	0	0	0	0	0	0	0	26	0	0	0		0	0	nd	nd	nd	0	0	0	0	0	0	0
k__Archaea_p__Euryarchaeota_c__Methanobacteria_o__Methanobacteriales_f__Methanobacteriaceae_g__Methanobacterium_s__	0	0	0	0	9	0	0	0	0	0	4	0		0	0	nd	nd	nd	0	0	0	0	0	0	0
k__Archaea_p__Euryarchaeota_c__Methanobacteria_o__Methanobacteriales_f__Methanobacteriaceae_g__Methanosphaera_s__	0	0	0	0	0	0	0	0	0	5	0	0		0	0	nd	nd	nd	0	0	0	0	0	0	0
k__Archaea_p__Euryarchaeota_c__Methanomicrobia_o__Methanocellales_f__Methanocellaceae_g__Methanocella_s__	0	0	7	0	0	0	0	0	0	0	0	0		0	0	nd	nd	nd	0	0	0	0	0	0	0
k__Archaea_p__Euryarchaeota_c__Methanomicrobia_o__Methanomicrobiales_f___g___s__	0	0	0	0	0	0	0	0	0	7	0	0		0	0	nd	nd	nd	0	0	0	0	0	0	0
k__Archaea_p__Euryarchaeota_c__Methanomicrobia_o__Methanomicrobiales_f__Methanoregulaceae_g__CandidatusMethanoregula_s__	0	0	0	0	0	0	3	0	0	0	0	0		0	0	nd	nd	nd	0	0	0	0	0	0	0
k__Archaea_p__Euryarchaeota_c__Methanomicrobia_o__Methanomicrobiales_f__Methanospirillaceae_g__Methanospirillum_s__	0	0	0	0	0	0	0	0	12	0	0	0		0	0	nd	nd	nd	0	0	0	0	0	0	0
k__Archaea_p__Euryarchaeota_c__Methanomicrobia_o__Methanosarcinales_f__Methanosaetaceae_g__Methanosaeta_s__	0	0	0	0	0	0	0	0	0	8	0	0		0	0	nd	nd	nd	0	0	0	0	0	0	0
k__Archaea_p__Euryarchaeota_c__Methanomicrobia_o__Methanosarcinales_f__Methanosarcinaceae_g__Methanosarcina_s__	0	0	0	0	0	0	0	4	0	0	0	0		0	0	nd	nd	nd	0	0	0	0	0	0	0
k__Archaea_p__Euryarchaeota_c__Thermoplasmata_NA_NA_NA_NA	0	0	40	0	8	0	0	0	0	0	0	0		0	0	nd	nd	nd	0	0	0	0	0	0	0
k__Archaea_p__Euryarchaeota_c__Thermoplasmata_o__E2_f___g___s__	0	0	0	0	4	0	0	0	0	11	0	0		0	0	nd	nd	nd	0	0	0	0	0	0	0
k__Archaea_p__Euryarchaeota_c__Thermoplasmata_o__E2_f__[Methanomassiliicoccaceae]_g___s__	0	0	0	0	0	0	0	0	0	14	0	0		0	0	nd	nd	nd	0	0	0	0	0	0	0
k__Archaea_p__Euryarchaeota_c__Thermoplasmata_o__E2_f__DHVEG1_g___s__	0	0	0	0	0	0	0	0	0	4	0	0		0	0	nd	nd	nd	0	0	0	0	0	0	0
k__Archaea_p__Euryarchaeota_c__Thermoplasmata_o__E2_f__TMEG_g___s__	0	0	0	0	0	0	7	0	0	0	0	0		0	0	nd	nd	nd	0	0	0	0	0	0	0
k__Bacteria_NA_NA_NA_NA_NA_NA	196	224	913	70	332	488	1182	675	1330	733	286	152		1362	787	nd	nd	nd	46	901	29	672	323	1209	322
k__Bacteria_p__[Thermi]_c__Deinococci_o__Deinococcales_f__Deinococcaceae_g__CM44_s__	0	0	0	0	0	0	17	8	9	13	20	20		163	0	nd	nd	nd	0	0	0	0	20	37	387
k__Bacteria_p__[Thermi]_c__Deinococci_o__Deinococcales_f__Deinococcaceae_g__Deinobacterium_s__	0	0	0	0	0	0	0	0	127	16	0	0		0	0	nd	nd	nd	0	0	0	0	0	0	0
k__Bacteria_p__[Thermi]_c__Deinococci_o__Deinococcales_f__Deinococcaceae_g__Deinococcus_NA	0	0	0	0	0	0	0	0	0	0	4	0		0	0	nd	nd	nd	0	0	0	0	0	0	0
k__Bacteria_p__[Thermi]_c__Deinococci_o__Deinococcales_f__Deinococcaceae_g__Deinococcus_s__	0	0	0	0	0	0	0	0	3	0	0	14		0	0	nd	nd	nd	0	0	0	0	0	0	0
k__Bacteria_p__[Thermi]_c__Deinococci_o__Deinococcales_f__Trueperaceae_g___s__	0	0	0	0	0	0	0	0	0	0	0	0		4	0	nd	nd	nd	0	0	0	0	0	0	0
k__Bacteria_p__[Thermi]_c__Deinococci_o__Deinococcales_f__Trueperaceae_g__Truepera_s__	0	0	46	0	0	0	0	0	0	0	0	0		0	11	nd	nd	nd	11	57	41	10	0	31	0
k__Bacteria_p__[Thermi]_c__Deinococci_o__Deinococcales_f__Trueperaceae_NA_NA	0	0	0	0	3	0	0	0	0	0	0	0		0	0	nd	nd	nd	0	0	0	0	0	0	0
k__Bacteria_p__[Thermi]_c__Deinococci_o__Thermales_f__Thermaceae_g__Thermus_s__	0	2	6	0	3	0	0	40	0	15	0	0		18	0	nd	nd	nd	0	7	0	0	3	6	0
k__Bacteria_p__AC1_c___o___f___g___s__	0	0	0	0	0	0	0	0	0	0	0	0		0	0	nd	nd	nd	0	0	0	0	0	0	0
k__Bacteria_p__AC1_c__HDBWWB69_o___f___g___s__	0	21	0	0	14	0	30	0	0	0	0	0		0	0	nd	nd	nd	0	0	0	0	0	0	0
k__Bacteria_p__AC1_c__SHA114_o___f___g___s__	0	0	0	0	0	0	4	0	0	8	0	0		0	0	nd	nd	nd	0	0	0	0	0	0	0
k__Bacteria_p__Acidobacteria_c___o___f___g___s__	0	40	0	7	10	20	12	0	128	71	14	0		0	0	nd	nd	nd	0	0	0	73	66	27	28
k__Bacteria_p__Acidobacteria_c__[Chloracidobacteria]_o___f___g___s__	8	0	0	0	0	2	0	0	12	0	0	0		0	0	nd	nd	nd	0	0	0	0	0	0	0
k__Bacteria_p__Acidobacteria_c__[Chloracidobacteria]_o__[Chloracidobacterales]_f__[Chloracidobacteraceae]_g___s__	0	0	0	0	0	0	7	0	0	0	0	0		0	0	nd	nd	nd	0	0	0	0	0	0	0
k__Bacteria_p__Acidobacteria_c__[Chloracidobacteria]_o__1124_f___g___s__	77	0	0	0	0	0	5	0	36	0	0	0		0	0	nd	nd	nd	0	0	0	0	0	0	0
k__Bacteria_p__Acidobacteria_c__[Chloracidobacteria]_o__DS100_f___g___s__	0	0	0	0	0	0	3	0	0	40	0	0		0	0	nd	nd	nd	0	0	0	0	0	0	0
k__Bacteria_p__Acidobacteria_c__[Chloracidobacteria]_o__PK29_f___g___s__	13	21	52	69	12	19	107	5	13	49	6	8		272	0	nd	nd	nd	11	0	52	47	30	113	149
k__Bacteria_p__Acidobacteria_c__[Chloracidobacteria]_o__RB41_f___g___s__	0	0	0	0	0	9	0	0	0	20	0	0		54	0	nd	nd	nd	17	79	60	778	48	105	41
k__Bacteria_p__Acidobacteria_c__[Chloracidobacteria]_o__RB41_f__Ellin6075_g___s__	0	17	47	4	0	39	473	253	89	169	10	0		865	38	nd	nd	nd	52	282	0	498	219	639	567
k__Bacteria_p__Acidobacteria_c__Acidobacteria5_o___f___g___s__	9	0	0	0	95	47	20	0	203	210	26	8		13	0	nd	nd	nd	0	0	0	0	0	0	0
k__Bacteria_p__Acidobacteria_c__Acidobacteria6_o___f___g___s__	0	0	0	0	0	0	0	0	0	3	0	0		0	0	nd	nd	nd	0	0	0	0	0	0	0
k__Bacteria_p__Acidobacteria_c__Acidobacteria6_o__BPC015_f___g___s__	0	0	33	0	0	0	0	0	0	20	0	0		9	0	nd	nd	nd	0	0	0	0	0	0	0
k__Bacteria_p__Acidobacteria_c__Acidobacteria6_o__CCU21_f___g___s__	7	3	87	11	23	44	104	18	153	318	26	22		155	0	nd	nd	nd	0	0	0	0	0	0	0
k__Bacteria_p__Acidobacteria_c__Acidobacteria6_o__iii115_f___g___s__	107	37	74	34	524	240	835	417	923	1147	204	113		867	0	nd	nd	nd	0	0	0	0	0	0	0
k__Bacteria_p__Acidobacteria_c__Acidobacteria6_o__iii115_f__mb2424_g___s__	86	5	38	5	15	9	64	63	117	77	20	0		195	0	nd	nd	nd	0	0	0	0	0	0	0
k__Bacteria_p__Acidobacteria_c__Acidobacteria6_o__iii115_f__RB40_g___s__	11	35	60	21	13	33	69	0	22	189	66	62		247	0	nd	nd	nd	0	0	0	0	0	0	0
k__Bacteria_p__Acidobacteria_c__Acidobacteriia_o__Acidobacteriales_f__Acidobacteriaceae_g___s__	0	0	0	0	2	0	12	0	71	57	0	16		0	0	nd	nd	nd	0	13	0	0	0	0	0
k__Bacteria_p__Acidobacteria_c__Acidobacteriia_o__Acidobacteriales_f__Acidobacteriaceae_g__Edaphobacter_s__	0	0	0	0	0	0	0	0	0	22	0	0		0	0	nd	nd	nd	0	0	0	0	0	0	0
k__Bacteria_p__Acidobacteria_c__Acidobacteriia_o__Acidobacteriales_f__Acidobacteriaceae_g__Edaphobacter_s__modestum	0	0	0	0	0	4	0	0	0	0	0	81		0	0	nd	nd	nd	0	0	0	4	0	0	0
k__Bacteria_p__Acidobacteria_c__Acidobacteriia_o__Acidobacteriales_f__Acidobacteriaceae_g__Terriglobus_s__	0	0	0	0	0	6	0	0	3	24	0	73		0	0	nd	nd	nd	14	0	0	0	5	0	12
k__Bacteria_p__Acidobacteria_c__Acidobacteriia_o__Acidobacteriales_f__Koribacteraceae_g___s__	0	0	0	0	0	7	3	0	0	63	3	0		0	21	nd	nd	nd	0	0	0	0	0	0	0
k__Bacteria_p__Acidobacteria_c__Acidobacteriia_o__Acidobacteriales_f__Koribacteraceae_g__CandidatusKoribacter_NA	0	0	0	0	0	11	0	0	0	9	0	0		0	0	nd	nd	nd	0	0	0	0	0	0	0
k__Bacteria_p__Acidobacteria_c__Acidobacteriia_o__Acidobacteriales_f__Koribacteraceae_g__CandidatusKoribacter_s__	0	0	0	0	0	0	7	61	23	17	7	0		0	0	nd	nd	nd	0	0	0	0	0	0	0
k__Bacteria_p__Acidobacteria_c__ATs54_o___f___g___s__	0	28	10	2	0	49	0	0	53	71	14	7		0	0	nd	nd	nd	0	0	0	0	0	0	0
k__Bacteria_p__Acidobacteria_c__BPC102_o___f___g___s__	0	0	0	0	0	0	0	0	2	5	0	0		0	0	nd	nd	nd	0	0	0	0	2	0	0
k__Bacteria_p__Acidobacteria_c__BPC102_o__MVS40_f___g___s__	0	3	0	0	0	0	17	0	10	39	6	0		0	0	nd	nd	nd	0	0	0	0	0	0	0
k__Bacteria_p__Acidobacteria_c__DA052_o__E29_f___g___s__	0	0	19	0	0	0	0	0	0	0	0	0		4	0	nd	nd	nd	0	0	0	0	0	0	0
k__Bacteria_p__Acidobacteria_c__DA052_o__Ellin6513_f___g___s__	0	5	0	0	29	20	13	70	15	103	3	0		0	0	nd	nd	nd	0	0	0	0	5	7	0
k__Bacteria_p__Acidobacteria_c__EC1113_o___f___g___s__	0	0	0	0	0	4	18	0	0	87	0	0		0	0	nd	nd	nd	0	0	0	0	0	0	0
k__Bacteria_p__Acidobacteria_c__Holophagae_o__Holophagales_f__Holophagaceae_g___s__	0	0	0	0	48	36	55	0	85	80	24	24		0	0	nd	nd	nd	0	0	0	0	0	0	0
k__Bacteria_p__Acidobacteria_c__Holophagae_o__Holophagales_f__Holophagaceae_g__Geothrix_s__	0	0	0	0	0	4	0	132	9	69	0	64		0	0	nd	nd	nd	0	0	0	0	0	0	0
k__Bacteria_p__Acidobacteria_c__iii18_o__3220_f___g___s__	0	0	0	0	0	4	0	0	0	91	0	0		0	0	nd	nd	nd	0	0	0	0	0	0	0
k__Bacteria_p__Acidobacteria_c__iii18_o__DS18_f___g___s__	0	0	0	0	8	0	3	0	42	10	0	3		0	0	nd	nd	nd	0	0	0	0	0	0	0
k__Bacteria_p__Acidobacteria_c__iii18_o__SJA36_f___g___s__	0	0	0	0	3	0	0	0	0	42	0	0		0	0	nd	nd	nd	0	0	0	0	0	0	0
k__Bacteria_p__Acidobacteria_c__PAUC37f_o___f___g___s__	0	0	0	0	0	0	34	0	33	39	0	4		19	0	nd	nd	nd	0	6	0	25	44	16	42
k__Bacteria_p__Acidobacteria_c__RB25_o___f___g___s__	0	0	27	0	12	0	13	0	28	89	5	0		74	28	nd	nd	nd	0	5	0	72	87	224	77
k__Bacteria_p__Acidobacteria_c__S035_o___f___g___s__	0	0	0	0	0	15	3	0	0	4	0	0		0	0	nd	nd	nd	0	0	0	0	13	29	5
k__Bacteria_p__Acidobacteria_c__Solibacteres_o__JHWHS99_f___g___s__	0	0	0	0	0	0	0	0	0	7	13	0		0	0	nd	nd	nd	0	0	0	0	0	0	0
k__Bacteria_p__Acidobacteria_c__Solibacteres_o__Solibacterales_f___g___s__	0	14	5	6	21	24	70	45	212	84	14	0		170	37	nd	nd	nd	5	46	25	123	0	33	71
k__Bacteria_p__Acidobacteria_c__Solibacteres_o__Solibacterales_f__[Bryobacteraceae]_g___s__	0	8	0	0	0	0	23	0	10	22	11	0		186	6	nd	nd	nd	0	0	0	62	52	45	86
k__Bacteria_p__Acidobacteria_c__Solibacteres_o__Solibacterales_f__AKIW659_g___s__	0	0	0	0	0	0	14	0	0	0	0	0		0	0	nd	nd	nd	0	0	0	0	0	0	0
k__Bacteria_p__Acidobacteria_c__Solibacteres_o__Solibacterales_f__PAUC26f_g___s__	0	0	0	0	0	0	0	0	0	9	0	0		0	0	nd	nd	nd	0	0	0	0	0	0	0
k__Bacteria_p__Acidobacteria_c__Solibacteres_o__Solibacterales_f__Solibacteraceae_g___s__	0	0	0	0	0	0	0	0	0	21	0	0		40	0	nd	nd	nd	0	6	0	0	3	0	0
k__Bacteria_p__Acidobacteria_c__Solibacteres_o__Solibacterales_f__Solibacteraceae_g__CandidatusSolibacter_s__	0	0	0	0	0	0	9	26	0	28	0	0		32	0	nd	nd	nd	0	0	0	0	0	0	0
k__Bacteria_p__Acidobacteria_c__Sva0725_o__Sva0725_f___g___s__	19	0	105	4	10	19	46	71	64	125	6	10		74	0	nd	nd	nd	0	6	0	91	115	190	14
k__Bacteria_p__Acidobacteria_c__TM1_o___f___g___s__	0	0	0	0	12	3	4	0	0	9	0	0		0	0	nd	nd	nd	0	0	0	0	0	0	0
k__Bacteria_p__Acidobacteria_NA_NA_NA_NA_NA	0	0	0	0	0	0	0	0	0	22	2	0		0	0	nd	nd	nd	0	0	0	0	0	0	0
k__Bacteria_p__Actinobacteria_c___o___f___g___s__	0	0	0	0	0	0	10	0	0	0	0	0		0	0	nd	nd	nd	0	0	0	0	0	0	0
k__Bacteria_p__Actinobacteria_c__Acidimicrobiia_o__Acidimicrobiales_f___g___s__	4	67	152	41	96	272	346	670	350	276	17	46		1929	249	nd	nd	nd	20	225	68	329	206	705	131
k__Bacteria_p__Actinobacteria_c__Acidimicrobiia_o__Acidimicrobiales_f__AKIW874_g___s__	0	0	32	0	0	0	0	52	0	25	0	0		37	0	nd	nd	nd	0	0	0	15	12	68	0
k__Bacteria_p__Actinobacteria_c__Acidimicrobiia_o__Acidimicrobiales_f__C111_g___s__	0	12	314	79	23	145	172	387	208	97	8	32		1581	106	nd	nd	nd	126	525	88	188	144	515	140
k__Bacteria_p__Actinobacteria_c__Acidimicrobiia_o__Acidimicrobiales_f__EB1017_g___s__	0	0	145	4	10	9	62	128	106	74	20	0		555	26	nd	nd	nd	0	41	11	106	81	249	38
k__Bacteria_p__Actinobacteria_c__Acidimicrobiia_o__Acidimicrobiales_f__Iamiaceae_g__Iamia_s__	0	0	48	0	0	0	0	19	145	30	0	0		331	0	nd	nd	nd	0	15	11	103	63	82	44
k__Bacteria_p__Actinobacteria_c__Acidimicrobiia_o__Acidimicrobiales_f__JdFBGBact_g___s__	0	4	0	0	0	0	0	0	0	0	0	0		0	0	nd	nd	nd	0	0	0	0	0	0	0
k__Bacteria_p__Actinobacteria_c__Acidimicrobiia_o__Acidimicrobiales_f__koll13_g___s__	0	0	31	0	2	20	0	0	0	16	0	0		252	17	nd	nd	nd	6	47	0	37	9	139	0
k__Bacteria_p__Actinobacteria_c__Acidimicrobiia_o__Acidimicrobiales_f__Microthrixaceae_g___s__	0	10	113	28	0	13	0	79	0	16	0	0		15	22	nd	nd	nd	0	0	0	10	0	0	0
k__Bacteria_p__Actinobacteria_c__Acidimicrobiia_o__Acidimicrobiales_f__TK06_g___s__	0	0	0	0	0	0	0	0	0	8	0	0		18	0	nd	nd	nd	2	11	0	0	0	0	0
k__Bacteria_p__Actinobacteria_c__Acidimicrobiia_o__Acidimicrobiales_f__ZA3409c_g___s__	0	0	0	0	0	0	4	0	0	0	0	0		0	0	nd	nd	nd	0	0	0	0	0	0	0
k__Bacteria_p__Actinobacteria_c__Acidimicrobiia_o__Acidimicrobiales_NA_NA_NA	0	0	92	0	6	0	0	0	11	0	9	0		139	0	nd	nd	nd	0	20	0	11	0	33	0
k__Bacteria_p__Actinobacteria_c__Actinobacteria_o___f___g___s__	0	60	0	0	37	151	32	21	37	36	15	29		10	0	nd	nd	nd	0	27	0	5	0	0	23
k__Bacteria_p__Actinobacteria_c__Actinobacteria_o__Actinomycetales_f___g___s__	0	80	539	256	183	325	178	142	149	120	56	78		455	113	nd	nd	nd	0	109	0	44	66	79	60
k__Bacteria_p__Actinobacteria_c__Actinobacteria_o__Actinomycetales_f__ACKM1_g___s__	0	3893	2853	7545	885	2592	360	15	162	75	334	592		0	0	nd	nd	nd	0	0	0	0	0	0	0
k__Bacteria_p__Actinobacteria_c__Actinobacteria_o__Actinomycetales_f__Actinomycetaceae_g___s__	0	0	103	0	0	0	0	0	0	0	0	0		0	0	nd	nd	nd	0	0	0	0	0	0	0
k__Bacteria_p__Actinobacteria_c__Actinobacteria_o__Actinomycetales_f__Actinomycetaceae_g__Actinomyces_s__	0	0	15	0	0	0	0	0	0	15	0	0		7	0	nd	nd	nd	0	0	0	0	0	17	0
k__Bacteria_p__Actinobacteria_c__Actinobacteria_o__Actinomycetales_f__Actinomycetaceae_g__N09_s__	0	0	22	0	0	0	0	0	0	0	0	0		0	0	nd	nd	nd	0	0	0	0	0	0	0
k__Bacteria_p__Actinobacteria_c__Actinobacteria_o__Actinomycetales_f__Actinospicaceae_g___s__	0	0	0	0	3	0	0	0	0	0	0	0		0	0	nd	nd	nd	0	0	0	0	0	0	0
k__Bacteria_p__Actinobacteria_c__Actinobacteria_o__Actinomycetales_f__Actinosynnemataceae_g___s__	0	0	9	0	0	0	0	0	0	0	0	0		0	0	nd	nd	nd	0	0	0	0	0	0	0
k__Bacteria_p__Actinobacteria_c__Actinobacteria_o__Actinomycetales_f__Actinosynnemataceae_NA_NA	0	0	25	0	0	0	0	0	0	0	0	0		0	0	nd	nd	nd	0	0	0	0	0	0	0
k__Bacteria_p__Actinobacteria_c__Actinobacteria_o__Actinomycetales_f__Brevibacteriaceae_g__Brevibacterium_s__	0	0	3	0	0	0	0	0	0	0	0	0		0	0	nd	nd	nd	0	0	0	0	0	0	0
k__Bacteria_p__Actinobacteria_c__Actinobacteria_o__Actinomycetales_f__Cellulomonadaceae_g__Cellulomonas_NA	0	0	0	0	0	12	0	0	0	0	0	0		0	0	nd	nd	nd	0	0	0	0	0	0	0
k__Bacteria_p__Actinobacteria_c__Actinobacteria_o__Actinomycetales_f__Cellulomonadaceae_g__Cellulomonas_s__	0	20	0	0	0	0	3	0	0	13	0	0		25	0	nd	nd	nd	0	120	7	0	0	0	0
k__Bacteria_p__Actinobacteria_c__Actinobacteria_o__Actinomycetales_f__Cellulomonadaceae_g__Demequina_s__	0	0	0	0	0	0	24	0	0	14	0	0		0	0	nd	nd	nd	0	45	0	0	0	0	0
k__Bacteria_p__Actinobacteria_c__Actinobacteria_o__Actinomycetales_f__Corynebacteriaceae_g__Corynebacterium_NA	0	0	0	0	0	0	16	0	18	0	0	0		0	0	nd	nd	nd	0	0	0	0	0	0	0
k__Bacteria_p__Actinobacteria_c__Actinobacteria_o__Actinomycetales_f__Corynebacteriaceae_g__Corynebacterium_s__	0	17	20	0	0	0	0	0	0	15	0	0		15	0	nd	nd	nd	0	0	0	0	0	0	0
k__Bacteria_p__Actinobacteria_c__Actinobacteria_o__Actinomycetales_f__Corynebacteriaceae_g__Corynebacterium_s__variabile	0	0	0	0	0	10	0	0	0	0	0	0		0	0	nd	nd	nd	0	0	0	0	0	0	0
k__Bacteria_p__Actinobacteria_c__Actinobacteria_o__Actinomycetales_f__Cryptosporangiaceae_g__Cryptosporangium_s__	0	0	0	6	28	0	0	0	0	0	0	20		0	0	nd	nd	nd	0	0	0	0	0	0	0
k__Bacteria_p__Actinobacteria_c__Actinobacteria_o__Actinomycetales_f__Dermabacteraceae_g__Brachybacterium_s__	0	4	0	0	0	0	0	0	0	0	0	0		0	0	nd	nd	nd	0	0	0	0	0	0	0
k__Bacteria_p__Actinobacteria_c__Actinobacteria_o__Actinomycetales_f__Frankiaceae_g___s__	0	0	0	0	0	23	0	0	0	40	0	37		0	0	nd	nd	nd	0	7	46	0	0	0	0
k__Bacteria_p__Actinobacteria_c__Actinobacteria_o__Actinomycetales_f__Frankiaceae_g__Frankia_s__	0	0	0	0	0	0	0	55	0	0	0	0		0	0	nd	nd	nd	0	120	0	28	22	27	0
k__Bacteria_p__Actinobacteria_c__Actinobacteria_o__Actinomycetales_f__Geodermatophilaceae_g___s__	0	0	30	6	5	69	0	0	11	0	0	0		0	0	nd	nd	nd	523	114	14	0	0	33	0
k__Bacteria_p__Actinobacteria_c__Actinobacteria_o__Actinomycetales_f__Geodermatophilaceae_NA_NA	0	0	0	0	0	0	0	0	0	10	0	0		0	0	nd	nd	nd	0	0	0	0	0	0	0
k__Bacteria_p__Actinobacteria_c__Actinobacteria_o__Actinomycetales_f__Glycomycetaceae_g__Glycomyces_s__	0	0	6	0	4	0	0	0	0	0	0	0		0	0	nd	nd	nd	0	0	0	0	0	0	0
k__Bacteria_p__Actinobacteria_c__Actinobacteria_o__Actinomycetales_f__Gordoniaceae_g__Gordonia_s__	0	0	23	0	0	0	17	0	0	0	0	0		0	0	nd	nd	nd	0	0	0	0	0	0	0
k__Bacteria_p__Actinobacteria_c__Actinobacteria_o__Actinomycetales_f__Intrasporangiaceae_g___s__	53	0	306	0	0	0	0	45	0	0	0	0		0	0	nd	nd	nd	0	0	0	0	0	0	0
k__Bacteria_p__Actinobacteria_c__Actinobacteria_o__Actinomycetales_f__Intrasporangiaceae_g__Phycicoccus_s__	28	13	0	0	12	29	0	0	27	42	0	0		0	0	nd	nd	nd	0	29	9	0	10	0	0
k__Bacteria_p__Actinobacteria_c__Actinobacteria_o__Actinomycetales_f__Intrasporangiaceae_NA_NA	0	0	368	0	0	0	0	0	0	0	0	0		8	50	nd	nd	nd	0	0	0	0	0	9	0
k__Bacteria_p__Actinobacteria_c__Actinobacteria_o__Actinomycetales_f__Kineosporiaceae_g___s__	0	11	0	0	42	0	42	0	85	69	24	0		66	0	nd	nd	nd	93	297	22	104	48	45	0
k__Bacteria_p__Actinobacteria_c__Actinobacteria_o__Actinomycetales_f__Kineosporiaceae_g__Kineococcus_s__	0	0	0	0	0	11	0	0	0	0	0	0		0	0	nd	nd	nd	29	13	0	0	0	0	0
k__Bacteria_p__Actinobacteria_c__Actinobacteria_o__Actinomycetales_f__Kineosporiaceae_g__Kineosporia_s__	0	0	0	0	0	47	56	17	0	0	0	0		18	0	nd	nd	nd	223	110	0	13	0	0	0
k__Bacteria_p__Actinobacteria_c__Actinobacteria_o__Actinomycetales_f__Microbacteriaceae_g___s__	0	728	956	595	252	960	138	49	168	40	147	290		341	0	nd	nd	nd	34	32	0	0	0	64	114
k__Bacteria_p__Actinobacteria_c__Actinobacteria_o__Actinomycetales_f__Microbacteriaceae_g__Agromyces_s__	0	13	85	0	0	0	11	0	0	0	0	0		44	96	nd	nd	nd	0	24	0	0	0	0	0
k__Bacteria_p__Actinobacteria_c__Actinobacteria_o__Actinomycetales_f__Microbacteriaceae_g__CandidatusAquiluna_s__rubra	0	1357	921	546	137	222	0	0	0	0	0	381		0	0	nd	nd	nd	0	0	0	0	0	0	0
k__Bacteria_p__Actinobacteria_c__Actinobacteria_o__Actinomycetales_f__Microbacteriaceae_g__CandidatusRhodoluna_s__	0	3799	1458	1620	814	3508	965	17	416	37	1759	1068		0	0	nd	nd	nd	0	0	0	0	0	0	0
k__Bacteria_p__Actinobacteria_c__Actinobacteria_o__Actinomycetales_f__Microbacteriaceae_g__Clavibacter_s__	0	543	113	94	109	209	0	0	0	22	48	124		0	0	nd	nd	nd	0	0	0	0	0	0	0
k__Bacteria_p__Actinobacteria_c__Actinobacteria_o__Actinomycetales_f__Microbacteriaceae_g__Cryocola_s__	0	0	0	0	0	0	5	47	23	28	0	0		34	0	nd	nd	nd	276	42	0	0	0	0	0
k__Bacteria_p__Actinobacteria_c__Actinobacteria_o__Actinomycetales_f__Microbacteriaceae_g__Leucobacter_s__	0	12	66	0	24	0	0	0	0	0	0	0		53	31	nd	nd	nd	0	95	0	0	0	0	0
k__Bacteria_p__Actinobacteria_c__Actinobacteria_o__Actinomycetales_f__Microbacteriaceae_g__Microbacterium_s__	10	0	41	0	0	0	0	0	0	13	0	0		0	0	nd	nd	nd	297	71	0	0	0	0	0
k__Bacteria_p__Actinobacteria_c__Actinobacteria_o__Actinomycetales_f__Microbacteriaceae_g__Salinibacterium_s__	0	16	24	0	112	138	146	60	227	153	40	30		290	146	nd	nd	nd	1262	1527	66	344	90	334	233
k__Bacteria_p__Actinobacteria_c__Actinobacteria_o__Actinomycetales_f__Microbacteriaceae_g__Yonghaparkia_s__	0	15	136	0	0	0	0	0	0	0	0	0		0	0	nd	nd	nd	0	0	0	0	0	0	0
k__Bacteria_p__Actinobacteria_c__Actinobacteria_o__Actinomycetales_f__Microbacteriaceae_NA_NA	0	243	114	347	0	325	97	43	12	15	23	30		112	311	nd	nd	nd	469	226	0	154	56	0	0
k__Bacteria_p__Actinobacteria_c__Actinobacteria_o__Actinomycetales_f__Micrococcaceae_g___s__	0	0	99	0	0	0	11	0	0	11	0	0		0	63	nd	nd	nd	0	48	0	0	0	10	0
k__Bacteria_p__Actinobacteria_c__Actinobacteria_o__Actinomycetales_f__Micrococcaceae_g__Arthrobacter_s__	0	0	81	0	0	0	0	15	0	28	0	0		0	354	nd	nd	nd	0	0	0	8	0	0	0
k__Bacteria_p__Actinobacteria_c__Actinobacteria_o__Actinomycetales_f__Micrococcaceae_g__Arthrobacter_s__psychrolactophilus	0	0	163	0	0	0	28	0	0	18	0	32		0	286	nd	nd	nd	14	0	34	0	0	27	0
k__Bacteria_p__Actinobacteria_c__Actinobacteria_o__Actinomycetales_f__Micrococcaceae_g__Kocuria_s__palustris	0	0	0	0	0	0	25	0	0	0	0	0		0	0	nd	nd	nd	0	0	0	0	0	0	0
k__Bacteria_p__Actinobacteria_c__Actinobacteria_o__Actinomycetales_f__Micrococcaceae_g__Micrococcus_s__	0	0	14	0	0	0	0	0	0	0	0	0		0	0	nd	nd	nd	0	0	42	7	0	0	0
k__Bacteria_p__Actinobacteria_c__Actinobacteria_o__Actinomycetales_f__Micrococcaceae_g__Micrococcus_s__lylae	27	0	0	0	0	0	0	0	0	16	0	0		0	0	nd	nd	nd	0	0	0	0	0	0	0
k__Bacteria_p__Actinobacteria_c__Actinobacteria_o__Actinomycetales_f__Micrococcaceae_g__Nesterenkonia_s__	0	17	0	0	0	0	0	0	0	0	0	0		0	0	nd	nd	nd	0	23	0	0	0	0	0
k__Bacteria_p__Actinobacteria_c__Actinobacteria_o__Actinomycetales_f__Micrococcaceae_NA_NA	0	14	69	0	0	0	7	0	31	0	0	0		0	0	nd	nd	nd	0	0	0	0	0	0	0
k__Bacteria_p__Actinobacteria_c__Actinobacteria_o__Actinomycetales_f__Micromonosporaceae_g___s__	0	0	51	12	55	0	169	39	60	49	0	0		78	27	nd	nd	nd	103	131	0	15	0	98	29
k__Bacteria_p__Actinobacteria_c__Actinobacteria_o__Actinomycetales_f__Micromonosporaceae_g__Actinoplanes_s__	0	20	0	137	56	311	39	26	57	48	25	27		152	216	nd	nd	nd	601	9	0	0	13	21	0
k__Bacteria_p__Actinobacteria_c__Actinobacteria_o__Actinomycetales_f__Micromonosporaceae_g__Catellatospora_s__	0	0	0	3	5	0	0	0	0	0	0	0		0	0	nd	nd	nd	0	0	0	0	4	31	0
k__Bacteria_p__Actinobacteria_c__Actinobacteria_o__Actinomycetales_f__Micromonosporaceae_g__Couchioplanes_s__	0	0	0	0	0	0	33	0	0	16	18	0		0	0	nd	nd	nd	0	0	0	36	0	0	0
k__Bacteria_p__Actinobacteria_c__Actinobacteria_o__Actinomycetales_f__Micromonosporaceae_g__Dactylosporangium_s__	0	0	22	0	0	0	0	0	0	25	0	0		0	0	nd	nd	nd	0	21	0	17	0	0	0
k__Bacteria_p__Actinobacteria_c__Actinobacteria_o__Actinomycetales_f__Micromonosporaceae_g__Pilimelia_s__	0	0	0	0	80	22	0	76	28	41	0	0		0	0	nd	nd	nd	0	167	0	10	12	114	0
k__Bacteria_p__Actinobacteria_c__Actinobacteria_o__Actinomycetales_f__Micromonosporaceae_g__Virgisporangium_s__ochraceum	0	0	0	0	0	0	0	0	0	0	0	0		11	0	nd	nd	nd	0	0	0	0	0	20	30
k__Bacteria_p__Actinobacteria_c__Actinobacteria_o__Actinomycetales_f__Micromonosporaceae_NA_NA	0	0	170	0	23	0	0	0	0	57	0	23		0	66	nd	nd	nd	25	100	0	57	49	44	0
k__Bacteria_p__Actinobacteria_c__Actinobacteria_o__Actinomycetales_f__Mycobacteriaceae_g__Mycobacterium_NA	6	0	0	0	0	17	0	0	0	0	0	0		12	0	nd	nd	nd	0	0	0	0	0	0	0
k__Bacteria_p__Actinobacteria_c__Actinobacteria_o__Actinomycetales_f__Mycobacteriaceae_g__Mycobacterium_s__	37	96	648	195	252	204	256	134	259	199	39	91		284	128	nd	nd	nd	1089	602	8	318	85	337	58
k__Bacteria_p__Actinobacteria_c__Actinobacteria_o__Actinomycetales_f__Mycobacteriaceae_g__Mycobacterium_s__celatum	0	0	0	0	0	0	0	0	0	20	0	0		0	0	nd	nd	nd	0	0	0	0	21	0	0
k__Bacteria_p__Actinobacteria_c__Actinobacteria_o__Actinomycetales_f__Nakamurellaceae_g___s__	0	0	70	0	0	8	7	164	54	45	0	0		173	0	nd	nd	nd	32	505	4	59	0	0	0
k__Bacteria_p__Actinobacteria_c__Actinobacteria_o__Actinomycetales_f__Nocardiaceae_g___s__	0	0	0	0	0	0	0	0	0	18	0	0		0	0	nd	nd	nd	0	0	0	0	0	0	0
k__Bacteria_p__Actinobacteria_c__Actinobacteria_o__Actinomycetales_f__Nocardiaceae_g__Nocardia_s__	0	0	50	0	0	0	12	0	0	0	0	0		11	0	nd	nd	nd	0	38	0	0	0	0	0
k__Bacteria_p__Actinobacteria_c__Actinobacteria_o__Actinomycetales_f__Nocardiaceae_g__Rhodococcus_NA	0	0	17	0	0	0	0	0	0	0	0	0		0	0	nd	nd	nd	0	0	0	0	0	0	0
k__Bacteria_p__Actinobacteria_c__Actinobacteria_o__Actinomycetales_f__Nocardiaceae_g__Rhodococcus_s__	0	8	60	13	0	0	0	38	0	31	0	0		36	0	nd	nd	nd	22	0	0	0	0	11	0
k__Bacteria_p__Actinobacteria_c__Actinobacteria_o__Actinomycetales_f__Nocardiaceae_g__Rhodococcus_s__fascians	0	0	0	0	0	0	0	0	0	0	0	0		20	0	nd	nd	nd	0	14	0	0	0	0	0
k__Bacteria_p__Actinobacteria_c__Actinobacteria_o__Actinomycetales_f__Nocardiaceae_g__Smaragdicoccus_s__niigatensis	0	0	28	0	0	0	0	0	0	0	0	0		0	0	nd	nd	nd	0	0	0	0	0	0	0
k__Bacteria_p__Actinobacteria_c__Actinobacteria_o__Actinomycetales_f__Nocardioidaceae_g___s__	0	13	150	0	21	55	42	13	16	34	0	0		257	112	nd	nd	nd	836	385	58	97	23	227	0
k__Bacteria_p__Actinobacteria_c__Actinobacteria_o__Actinomycetales_f__Nocardioidaceae_g__Aeromicrobium_s__	0	0	0	0	12	0	0	27	60	15	0	0		71	29	nd	nd	nd	33	39	0	0	0	0	0
k__Bacteria_p__Actinobacteria_c__Actinobacteria_o__Actinomycetales_f__Nocardioidaceae_g__Nocardioides_NA	0	0	16	0	0	0	0	0	17	0	0	0		0	0	nd	nd	nd	0	0	0	0	0	0	0
k__Bacteria_p__Actinobacteria_c__Actinobacteria_o__Actinomycetales_f__Nocardioidaceae_g__Nocardioides_s__	0	21	30	0	40	0	48	32	0	18	0	24		59	0	nd	nd	nd	99	0	0	21	22	0	25
k__Bacteria_p__Actinobacteria_c__Actinobacteria_o__Actinomycetales_f__Nocardioidaceae_g__Nocardioides_s__furvisabuli	0	8	0	0	0	0	0	0	0	0	0	0		0	0	nd	nd	nd	0	0	0	0	0	0	0
k__Bacteria_p__Actinobacteria_c__Actinobacteria_o__Actinomycetales_f__Nocardioidaceae_g__Nocardioides_s__plantarum	0	0	0	0	0	0	13	0	0	0	0	0		0	0	nd	nd	nd	44	0	0	0	0	0	0
k__Bacteria_p__Actinobacteria_c__Actinobacteria_o__Actinomycetales_f__Promicromonosporaceae_g__Cellulosimicrobium_s__	0	6	28	0	5	0	0	0	0	0	0	0		0	0	nd	nd	nd	0	0	0	0	0	0	0
k__Bacteria_p__Actinobacteria_c__Actinobacteria_o__Actinomycetales_f__Promicromonosporaceae_g__Promicromonospora_s__	0	0	0	0	0	0	0	0	0	8	0	0		0	0	nd	nd	nd	0	0	0	0	0	0	0
k__Bacteria_p__Actinobacteria_c__Actinobacteria_o__Actinomycetales_f__Promicromonosporaceae_g__Xylanimicrobium_s__	0	0	0	0	0	0	0	0	0	0	0	0		0	0	nd	nd	nd	0	0	0	0	0	0	0
k__Bacteria_p__Actinobacteria_c__Actinobacteria_o__Actinomycetales_f__Propionibacteriaceae_g___s__	0	0	53	0	0	0	0	0	0	0	0	0		0	0	nd	nd	nd	0	0	0	0	0	0	0
k__Bacteria_p__Actinobacteria_c__Actinobacteria_o__Actinomycetales_f__Propionibacteriaceae_g__Microlunatus_s__	0	0	12	0	0	5	0	0	0	0	0	0		0	12	nd	nd	nd	0	0	0	0	0	0	0
k__Bacteria_p__Actinobacteria_c__Actinobacteria_o__Actinomycetales_f__Propionibacteriaceae_g__Propionibacterium_s__acnes	0	0	53	0	4	0	0	0	18	0	0	0		0	0	nd	nd	nd	0	3	0	0	0	0	0
k__Bacteria_p__Actinobacteria_c__Actinobacteria_o__Actinomycetales_f__Pseudonocardiaceae_g___s__	0	0	145	0	0	0	0	26	0	23	0	0		62	7	nd	nd	nd	50	24	0	8	0	43	0
k__Bacteria_p__Actinobacteria_c__Actinobacteria_o__Actinomycetales_f__Pseudonocardiaceae_g__Actinomycetospora_s__	0	20	0	0	0	0	0	0	0	0	0	0		0	0	nd	nd	nd	0	0	0	0	0	0	0
k__Bacteria_p__Actinobacteria_c__Actinobacteria_o__Actinomycetales_f__Pseudonocardiaceae_g__Amycolatopsis_s__	0	0	0	0	0	0	19	0	0	0	0	0		0	16	nd	nd	nd	0	0	0	0	0	0	0
k__Bacteria_p__Actinobacteria_c__Actinobacteria_o__Actinomycetales_f__Pseudonocardiaceae_g__Pseudonocardia_s__	0	25	46	0	0	0	46	0	11	31	0	0		183	30	nd	nd	nd	0	44	0	24	0	113	0
k__Bacteria_p__Actinobacteria_c__Actinobacteria_o__Actinomycetales_f__Pseudonocardiaceae_NA_NA	0	0	45	0	0	0	0	0	0	0	0	0		67	0	nd	nd	nd	0	0	0	0	0	0	0
k__Bacteria_p__Actinobacteria_c__Actinobacteria_o__Actinomycetales_f__Sanguibacteraceae_g__Sanguibacter_s__	0	0	0	0	0	0	0	0	0	6	0	0		0	78	nd	nd	nd	0	104	0	0	0	34	0
k__Bacteria_p__Actinobacteria_c__Actinobacteria_o__Actinomycetales_f__Sporichthyaceae_g___s__	0	0	16	0	0	0	0	0	0	0	0	0		21	0	nd	nd	nd	0	0	0	0	0	0	0
k__Bacteria_p__Actinobacteria_c__Actinobacteria_o__Actinomycetales_f__Streptomycetaceae_g___s__	0	0	34	17	82	0	29	0	0	12	0	0		21	34	nd	nd	nd	0	49	0	15	0	16	0
k__Bacteria_p__Actinobacteria_c__Actinobacteria_o__Actinomycetales_f__Streptomycetaceae_g__Streptacidiphilus_s__	0	0	55	0	0	0	0	0	0	0	0	0		0	0	nd	nd	nd	0	0	0	0	0	0	0
k__Bacteria_p__Actinobacteria_c__Actinobacteria_o__Actinomycetales_f__Streptomycetaceae_g__Streptomyces_NA	0	5	0	0	0	0	22	0	0	0	0	0		0	0	nd	nd	nd	0	0	0	5	0	0	0
k__Bacteria_p__Actinobacteria_c__Actinobacteria_o__Actinomycetales_f__Streptomycetaceae_g__Streptomyces_s__	0	0	27	0	93	0	0	0	0	32	0	0		31	0	nd	nd	nd	0	0	0	10	0	7	0
k__Bacteria_p__Actinobacteria_c__Actinobacteria_o__Actinomycetales_f__Streptomycetaceae_NA_NA	0	0	0	54	18	0	0	0	0	0	0	0		0	0	nd	nd	nd	0	0	0	0	0	0	0
k__Bacteria_p__Actinobacteria_c__Actinobacteria_o__Actinomycetales_f__Streptosporangiaceae_g___s__	0	0	0	0	0	0	0	0	5	0	0	0		0	0	nd	nd	nd	0	8	0	0	0	0	0
k__Bacteria_p__Actinobacteria_c__Actinobacteria_o__Actinomycetales_f__Streptosporangiaceae_g__Sphaerisporangium_s__	0	0	75	0	0	0	0	0	0	29	0	0		0	0	nd	nd	nd	0	0	0	0	0	0	0
k__Bacteria_p__Actinobacteria_c__Actinobacteria_o__Actinomycetales_f__Streptosporangiaceae_g__Streptosporangium_s__	0	0	0	0	0	0	0	0	0	10	9	0		0	0	nd	nd	nd	0	99	0	0	0	0	0
k__Bacteria_p__Actinobacteria_c__Actinobacteria_o__Actinomycetales_f__Streptosporangiaceae_g__Streptosporangium_s__pseudovulgare	0	0	0	0	0	0	11	0	0	0	0	0		0	0	nd	nd	nd	0	0	0	0	0	0	0
k__Bacteria_p__Actinobacteria_c__Actinobacteria_o__Actinomycetales_f__Streptosporangiaceae_NA_NA	0	0	0	0	0	2	0	0	0	0	0	0		8	0	nd	nd	nd	0	0	0	0	0	7	6
k__Bacteria_p__Actinobacteria_c__Actinobacteria_o__Actinomycetales_f__Thermomonosporaceae_g___s__	0	0	0	0	0	0	0	34	0	20	0	0		0	0	nd	nd	nd	0	0	0	0	0	0	0
k__Bacteria_p__Actinobacteria_c__Actinobacteria_o__Actinomycetales_f__Thermomonosporaceae_g__Actinoallomurus_s__iriomotensis	0	0	0	0	0	0	0	0	0	0	0	0		0	0	nd	nd	nd	0	0	0	0	0	0	0
k__Bacteria_p__Actinobacteria_c__Actinobacteria_o__Actinomycetales_f__Thermomonosporaceae_g__Actinocorallia_s__	0	0	10	0	0	0	0	0	0	0	0	0		0	0	nd	nd	nd	0	0	0	0	0	0	0
k__Bacteria_p__Actinobacteria_c__Actinobacteria_o__Actinomycetales_f__Williamsiaceae_g__Williamsia_s__	0	0	0	0	9	52	20	0	83	8	18	0		0	16	nd	nd	nd	109	132	0	68	0	42	0
k__Bacteria_p__Actinobacteria_c__Actinobacteria_o__Actinomycetales_NA_NA_NA	0	371	337	83	50	44	264	84	0	0	0	0		246	71	nd	nd	nd	0	60	11	190	13	65	0
k__Bacteria_p__Actinobacteria_c__Actinobacteria_o__Bifidobacteriales_f__Bifidobacteriaceae_g__Bifidobacterium_s__	0	15	0	0	0	0	0	0	8	0	7	0		0	0	nd	nd	nd	0	0	0	0	0	0	0
k__Bacteria_p__Actinobacteria_c__Actinobacteria_o__Micrococcales_f___g___s__	0	0	0	0	0	5	0	0	0	0	0	0		29	0	nd	nd	nd	0	0	0	10	7	62	0
k__Bacteria_p__Actinobacteria_c__Actinobacteria_o__WCHB181_f__At425_EubF1_g___s__	0	0	31	0	0	0	0	0	8	4	0	0		0	0	nd	nd	nd	0	0	0	0	0	0	0
k__Bacteria_p__Actinobacteria_c__MBA2108_o___f___g___s__	0	0	33	0	0	0	0	0	0	0	0	0		0	0	nd	nd	nd	0	0	0	0	0	0	0
k__Bacteria_p__Actinobacteria_c__MBA2108_o__03197L14_f___g___s__	3	14	161	0	42	31	83	57	36	257	25	0		433	0	nd	nd	nd	0	0	0	0	0	0	0
k__Bacteria_p__Actinobacteria_c__Nitriliruptoria_o__Euzebyales_f__Euzebyaceae_g__Euzebya_s__	0	0	84	0	0	0	0	0	0	0	0	0		22	0	nd	nd	nd	7	0	0	144	2	12	0
k__Bacteria_p__Actinobacteria_c__OPB41_o___f___g___s__	0	11	12	6	36	70	77	168	130	46	0	23		2	0	nd	nd	nd	0	24	0	6	12	6	0
k__Bacteria_p__Actinobacteria_c__Rubrobacteria_o__Rubrobacterales_f__Rubrobacteraceae_g___s__	0	0	0	0	0	0	0	0	0	15	0	0		45	0	nd	nd	nd	6	0	0	0	56	213	57
k__Bacteria_p__Actinobacteria_c__Rubrobacteria_o__Rubrobacterales_f__Rubrobacteraceae_g__Rubrobacter_s__	0	0	0	0	0	0	14	0	0	5	0	0		0	0	nd	nd	nd	0	9	0	0	0	86	0
k__Bacteria_p__Actinobacteria_c__Thermoleophilia_o___f___g___s__	0	9	0	0	4	27	12	0	3	27	4	0		0	0	nd	nd	nd	0	0	0	0	0	0	0
k__Bacteria_p__Actinobacteria_c__Thermoleophilia_o__Gaiellales_f___g___s__	0	8	85	20	47	49	95	103	28	114	21	0		347	81	nd	nd	nd	19	86	0	166	60	196	37
k__Bacteria_p__Actinobacteria_c__Thermoleophilia_o__Gaiellales_f__AK1AB1_02E_g___s__	0	7	0	0	6	32	12	46	0	8	0	0		161	0	nd	nd	nd	0	46	0	24	9	56	0
k__Bacteria_p__Actinobacteria_c__Thermoleophilia_o__Gaiellales_f__Gaiellaceae_g___s__	9	79	1152	21	189	83	330	516	365	548	38	21		2989	384	nd	nd	nd	58	243	361	517	919	2502	352
k__Bacteria_p__Actinobacteria_c__Thermoleophilia_o__Solirubrobacterales_f___g___s__	0	33	491	26	56	213	145	268	42	308	6	0		1591	463	nd	nd	nd	61	568	95	475	194	1185	34
k__Bacteria_p__Actinobacteria_c__Thermoleophilia_o__Solirubrobacterales_f__Conexibacteraceae_g___s__	0	0	0	7	0	9	7	0	13	0	0	0		23	16	nd	nd	nd	0	40	0	14	0	26	0
k__Bacteria_p__Actinobacteria_c__Thermoleophilia_o__Solirubrobacterales_f__Conexibacteraceae_g__Conexibacter_s__	0	0	12	5	63	17	42	0	14	29	0	0		47	0	nd	nd	nd	0	43	0	0	0	0	0
k__Bacteria_p__Actinobacteria_c__Thermoleophilia_o__Solirubrobacterales_f__Conexibacteraceae_NA_NA	0	87	31	13	0	11	25	0	0	0	0	0		0	0	nd	nd	nd	0	19	0	19	0	55	0
k__Bacteria_p__Actinobacteria_c__Thermoleophilia_o__Solirubrobacterales_f__Patulibacteraceae_g___s__	0	14	82	0	13	13	69	112	85	45	0	0		99	70	nd	nd	nd	42	148	0	126	43	101	0
k__Bacteria_p__Actinobacteria_c__Thermoleophilia_o__Solirubrobacterales_f__Patulibacteraceae_g__Patulibacter_s__	0	0	0	0	0	0	0	16	0	0	0	0		0	0	nd	nd	nd	0	5	0	0	0	0	0
k__Bacteria_p__Actinobacteria_c__Thermoleophilia_o__Solirubrobacterales_f__Solirubrobacteraceae_g___s__	0	26	0	0	22	0	26	0	22	26	0	0		378	270	nd	nd	nd	99	273	10	152	74	103	0
k__Bacteria_p__Actinobacteria_c__Thermoleophilia_o__Solirubrobacterales_f__Solirubrobacteraceae_NA_NA	0	0	0	0	0	0	0	0	0	28	0	0		0	0	nd	nd	nd	0	0	0	0	0	0	0
k__Bacteria_p__Actinobacteria_c__Thermoleophilia_o__Solirubrobacterales_NA__0	0	0	0	0	0	0	0	0	0	0	0	0		0	0	nd	nd	nd	0	0	0	0	0	0	0
k__Bacteria_p__Actinobacteria_c__Thermoleophilia_o__Solirubrobacterales_NA_NA_NA	0	0	4	0	0	0	0	27	34	13	21	14		73	0	nd	nd	nd	16	0	0	0	0	15	0
k__Bacteria_p__Actinobacteria_NA_NA_NA_NA_NA	5	0	0	0	0	0	2	0	0	0	0	0		0	0	nd	nd	nd	0	0	0	0	5	0	0
k__Bacteria_p__AD3_c__ABS6_o___f___g___s__	0	0	0	0	19	0	0	0	28	23	0	0		0	0	nd	nd	nd	0	0	0	0	0	0	0
k__Bacteria_p__AD3_c__JG37AG4_o___f___g___s__	0	0	0	0	19	3	0	0	0	8	0	0		0	0	nd	nd	nd	0	0	0	0	0	0	0
k__Bacteria_p__Aquificae_c__Aquificae_o__Aquificales_f__Aquificaceae_g___s__	0	0	0	0	5	0	0	9	0	0	0	0		0	0	nd	nd	nd	0	0	0	0	0	0	0
k__Bacteria_p__Armatimonadetes_c__[Fimbriimonadia]_o___f___g___s__	0	0	0	0	9	0	0	0	0	24	0	0		16	16	nd	nd	nd	0	0	0	0	22	0	0
k__Bacteria_p__Armatimonadetes_c__[Fimbriimonadia]_o__[Fimbriimonadales]_f__[Fimbriimonadaceae]_g___s__	0	0	11	3	0	0	0	0	0	15	0	0		99	42	nd	nd	nd	2	0	0	17	25	25	4
k__Bacteria_p__Armatimonadetes_c__[Fimbriimonadia]_o__[Fimbriimonadales]_f__[Fimbriimonadaceae]_g__Fimbriimonas_s__	0	24	94	7	31	42	21	35	78	54	16	39		208	79	nd	nd	nd	29	0	0	11	12	90	115
k__Bacteria_p__Armatimonadetes_c__03196E2_o___f___g___s__	31	0	45	0	9	0	10	0	79	7	0	0		33	0	nd	nd	nd	0	0	0	0	0	0	0
k__Bacteria_p__Armatimonadetes_c__Armatimonadia_o__Armatimonadales_f__Armatimonadaceae_g___s__	0	54	34	235	17	32	0	0	0	0	0	0		42	0	nd	nd	nd	24	2	0	4	0	0	0
k__Bacteria_p__Armatimonadetes_c__Armatimonadia_o__Armatimonadales_f__Armatimonadaceae_g__Armatimonas_s__	0	23	29	90	6	30	0	0	55	5	0	27		152	6	nd	nd	nd	0	0	0	0	0	24	75
k__Bacteria_p__Armatimonadetes_c__Armatimonadia_o__FW68_f___g___s__	0	0	0	0	6	0	0	0	6	27	21	0		0	20	nd	nd	nd	0	0	0	0	0	0	0
k__Bacteria_p__Armatimonadetes_c__Chthonomonadetes_o__Chthonomonadales_f__Chthonomonadaceae_g___s__	0	0	97	0	0	0	0	0	0	0	0	0		0	0	nd	nd	nd	0	0	0	0	0	0	0
k__Bacteria_p__Armatimonadetes_c__Chthonomonadetes_o__SJA22_f___g___s__	0	0	0	0	0	0	0	0	2	36	0	0		0	0	nd	nd	nd	0	0	0	0	0	0	0
k__Bacteria_p__Armatimonadetes_c__SJA176_o__GABB06_f___g___s__	0	0	0	0	5	0	0	0	0	0	0	0		0	0	nd	nd	nd	0	0	0	0	0	0	0
k__Bacteria_p__Armatimonadetes_c__SJA176_o__RB046_f___g___s__	0	4	0	0	0	0	12	0	60	0	0	0		0	0	nd	nd	nd	0	0	0	0	0	0	0
k__Bacteria_p__Bacteroidetes_c__[Rhodothermi]_o__[Rhodothermales]_f__Rhodothermaceae_g___s__	0	0	0	0	0	0	13	0	28	83	10	3		32	0	nd	nd	nd	0	0	0	0	0	157	0
k__Bacteria_p__Bacteroidetes_c__[Rhodothermi]_o__[Rhodothermales]_NA_NA_NA	0	0	0	2	0	0	0	0	0	0	0	2		0	0	nd	nd	nd	4	0	0	0	0	0	0
k__Bacteria_p__Bacteroidetes_c__[Saprospirae]_o__[Saprospirales]_f___g___s__	0	29	152	26	40	150	31	182	228	95	109	69		72	8	nd	nd	nd	0	51	0	20	17	12	86
k__Bacteria_p__Bacteroidetes_c__[Saprospirae]_o__[Saprospirales]_f__Chitinophagaceae_g___s__	5	438	2765	731	571	606	455	72	589	772	157	531		1145	115	nd	nd	nd	1011	441	58	716	462	608	786
k__Bacteria_p__Bacteroidetes_c__[Saprospirae]_o__[Saprospirales]_f__Chitinophagaceae_g__Chitinophaga_s__	0	14	0	0	0	24	53	0	0	18	0	0		0	0	nd	nd	nd	0	0	0	23	0	0	0
k__Bacteria_p__Bacteroidetes_c__[Saprospirae]_o__[Saprospirales]_f__Chitinophagaceae_g__Ferruginibacter_s__lapsinanis	0	0	0	0	0	0	0	0	0	11	0	0		0	0	nd	nd	nd	0	0	0	36	31	0	0
k__Bacteria_p__Bacteroidetes_c__[Saprospirae]_o__[Saprospirales]_f__Chitinophagaceae_g__Filimonas_s__lacunae	0	0	0	0	0	4	15	0	0	0	0	0		0	0	nd	nd	nd	8	83	0	9	0	0	0
k__Bacteria_p__Bacteroidetes_c__[Saprospirae]_o__[Saprospirales]_f__Chitinophagaceae_g__Flavihumibacter_s__	0	0	0	0	0	0	0	0	0	0	0	8		0	0	nd	nd	nd	0	0	0	0	0	0	15
k__Bacteria_p__Bacteroidetes_c__[Saprospirae]_o__[Saprospirales]_f__Chitinophagaceae_g__Lacibacter_s__cauensis	0	0	0	2	0	0	0	0	0	0	0	0		0	0	nd	nd	nd	0	0	0	0	6	0	11
k__Bacteria_p__Bacteroidetes_c__[Saprospirae]_o__[Saprospirales]_f__Chitinophagaceae_g__Niabella_s__	0	0	32	0	46	46	35	0	84	97	32	55		134	18	nd	nd	nd	0	100	0	167	110	103	214
k__Bacteria_p__Bacteroidetes_c__[Saprospirae]_o__[Saprospirales]_f__Chitinophagaceae_g__Niastella_s__	0	0	0	10	0	0	0	0	0	9	0	0		0	0	nd	nd	nd	0	0	0	0	0	0	7
k__Bacteria_p__Bacteroidetes_c__[Saprospirae]_o__[Saprospirales]_f__Chitinophagaceae_g__Sediminibacterium_s__	0	1282	573	430	381	561	306	83	189	319	465	694		296	20	nd	nd	nd	301	399	39	146	60	117	270
k__Bacteria_p__Bacteroidetes_c__[Saprospirae]_o__[Saprospirales]_f__Chitinophagaceae_g__Segetibacter_s__	0	0	0	0	0	16	0	0	0	0	0	0		0	0	nd	nd	nd	0	10	0	0	0	0	0
k__Bacteria_p__Bacteroidetes_c__[Saprospirae]_o__[Saprospirales]_f__Chitinophagaceae_g__Terrimonas_NA	0	0	0	0	0	0	0	0	0	0	5	0		0	0	nd	nd	nd	0	0	0	0	0	0	0
k__Bacteria_p__Bacteroidetes_c__[Saprospirae]_o__[Saprospirales]_f__Chitinophagaceae_g__Terrimonas_s__ferruginea	0	0	0	0	0	0	0	0	0	0	2	0		0	0	nd	nd	nd	0	0	0	0	0	0	0
k__Bacteria_p__Bacteroidetes_c__[Saprospirae]_o__[Saprospirales]_f__Chitinophagaceae_NA_NA	0	0	0	0	0	9	57	0	50	19	0	22		78	0	nd	nd	nd	150	5	0	0	5	11	49
k__Bacteria_p__Bacteroidetes_c__[Saprospirae]_o__[Saprospirales]_f__Saprospiraceae_g___s__	5	163	320	137	50	453	806	362	1413	522	698	480		1206	69	nd	nd	nd	60	31	64	534	418	682	821
k__Bacteria_p__Bacteroidetes_c__[Saprospirae]_o__[Saprospirales]_f__Saprospiraceae_g__Haliscomenobacter_s__	0	0	61	7	5	59	71	0	16	18	14	110		221	0	nd	nd	nd	3	0	0	67	28	100	341
k__Bacteria_p__Bacteroidetes_c__[Saprospirae]_o__[Saprospirales]_f__Saprospiraceae_g__Saprospira_s__	0	31	141	166	0	11	15	0	0	0	5	6		14	0	nd	nd	nd	0	0	0	0	0	3	0
k__Bacteria_p__Bacteroidetes_c__[Saprospirae]_o__[Saprospirales]_f__Saprospiraceae_NA_NA	0	29	83	28	0	45	23	5	69	17	2	43		100	19	nd	nd	nd	0	0	0	0	44	23	88
k__Bacteria_p__Bacteroidetes_c__[Saprospirae]_o__[Saprospirales]_NA_NA_NA	0	43	53	16	74	16	18	19	6	13	5	0		2	0	nd	nd	nd	0	0	0	0	20	16	5
k__Bacteria_p__Bacteroidetes_c__Bacteroidia_o__Bacteroidales_f___g___s__	0	46	0	28	73	265	277	101	482	431	114	103		0	0	nd	nd	nd	0	25	0	18	18	38	0
k__Bacteria_p__Bacteroidetes_c__Bacteroidia_o__Bacteroidales_f__[Paraprevotellaceae]_g__[Prevotella]_s__	0	0	0	0	0	0	0	0	14	9	0	0		0	0	nd	nd	nd	0	0	0	0	0	0	0
k__Bacteria_p__Bacteroidetes_c__Bacteroidia_o__Bacteroidales_f__BA008_g___s__	0	0	0	0	0	22	31	0	0	0	0	0		0	0	nd	nd	nd	0	0	0	0	0	0	0
k__Bacteria_p__Bacteroidetes_c__Bacteroidia_o__Bacteroidales_f__Bacteroidaceae_g___s__	0	0	43	0	0	24	171	0	8	17	0	0		0	0	nd	nd	nd	0	0	0	56	0	0	0
k__Bacteria_p__Bacteroidetes_c__Bacteroidia_o__Bacteroidales_f__Bacteroidaceae_g__Bacteroides_s__	0	0	9	0	16	8	65	8	84	69	18	14		0	0	nd	nd	nd	0	0	0	0	21	0	17
k__Bacteria_p__Bacteroidetes_c__Bacteroidia_o__Bacteroidales_f__Bacteroidaceae_g__Bacteroides_s__coprosuis	0	15	0	0	0	0	0	0	0	0	0	0		0	0	nd	nd	nd	0	0	0	0	0	0	0
k__Bacteria_p__Bacteroidetes_c__Bacteroidia_o__Bacteroidales_f__Bacteroidaceae_g__Bacteroides_s__ovatus	0	0	89	0	0	0	0	0	0	0	0	0		0	0	nd	nd	nd	0	0	0	0	0	0	15
k__Bacteria_p__Bacteroidetes_c__Bacteroidia_o__Bacteroidales_f__Bacteroidaceae_NA_NA	0	0	48	0	5	0	95	48	7	0	0	0		0	0	nd	nd	nd	0	0	0	0	0	0	0
k__Bacteria_p__Bacteroidetes_c__Bacteroidia_o__Bacteroidales_f__GZKB119_g___s__	0	0	0	0	0	0	9	0	0	0	0	0		0	0	nd	nd	nd	0	0	0	0	0	0	0
k__Bacteria_p__Bacteroidetes_c__Bacteroidia_o__Bacteroidales_f__Marinilabiaceae_g___s__	0	14	22	0	0	0	12	27	0	0	0	0		0	0	nd	nd	nd	0	0	0	0	0	0	0
k__Bacteria_p__Bacteroidetes_c__Bacteroidia_o__Bacteroidales_f__Marinilabiaceae_NA_NA	0	0	0	0	0	6	0	0	6	0	0	0		0	0	nd	nd	nd	0	0	0	0	0	0	0
k__Bacteria_p__Bacteroidetes_c__Bacteroidia_o__Bacteroidales_f__ML635J40_g___s__	0	0	0	0	0	0	35	0	5	21	0	0		0	0	nd	nd	nd	0	0	0	0	0	0	0
k__Bacteria_p__Bacteroidetes_c__Bacteroidia_o__Bacteroidales_f__p253418B5_g___s__	0	0	0	3	0	0	0	0	17	4	0	0		0	0	nd	nd	nd	0	0	0	0	0	0	0
k__Bacteria_p__Bacteroidetes_c__Bacteroidia_o__Bacteroidales_f__Porphyromonadaceae_g___s__	0	0	16	0	0	38	0	0	17	0	0	0		0	0	nd	nd	nd	0	0	0	0	0	0	0
k__Bacteria_p__Bacteroidetes_c__Bacteroidia_o__Bacteroidales_f__Porphyromonadaceae_g__Dysgonomonas_s__	0	0	12	7	0	17	41	0	21	10	11	0		121	5	nd	nd	nd	0	12	0	0	6	15	27
k__Bacteria_p__Bacteroidetes_c__Bacteroidia_o__Bacteroidales_f__Porphyromonadaceae_g__Paludibacter_s__	0	11	0	0	38	77	2042	31	559	251	77	105		30	0	nd	nd	nd	4	0	0	21	0	0	0
k__Bacteria_p__Bacteroidetes_c__Bacteroidia_o__Bacteroidales_f__Porphyromonadaceae_g__Parabacteroides_NA	0	0	0	7	0	0	6	0	0	0	0	0		0	0	nd	nd	nd	0	0	0	0	0	0	0
k__Bacteria_p__Bacteroidetes_c__Bacteroidia_o__Bacteroidales_f__Porphyromonadaceae_g__Parabacteroides_s__	0	6	0	0	0	0	0	0	0	0	0	0		0	0	nd	nd	nd	0	0	0	12	25	9	11
k__Bacteria_p__Bacteroidetes_c__Bacteroidia_o__Bacteroidales_f__Porphyromonadaceae_g__Parabacteroides_s__gordonii	0	0	0	0	0	0	0	0	0	11	0	0		10	0	nd	nd	nd	0	0	0	0	0	0	0
k__Bacteria_p__Bacteroidetes_c__Bacteroidia_o__Bacteroidales_f__Porphyromonadaceae_NA_NA	0	0	0	0	0	0	0	0	0	0	6	7		0	0	nd	nd	nd	0	0	0	0	15	0	0
k__Bacteria_p__Bacteroidetes_c__Bacteroidia_o__Bacteroidales_f__Prevotellaceae_g__Prevotella_s__	0	0	0	0	0	0	35	0	0	16	0	3		0	0	nd	nd	nd	0	0	0	0	0	0	6
k__Bacteria_p__Bacteroidetes_c__Bacteroidia_o__Bacteroidales_f__Rikenellaceae_g___s__	0	15	179	15	7	0	25	0	7	44	15	0		40	2	nd	nd	nd	0	3	0	0	0	18	0
k__Bacteria_p__Bacteroidetes_c__Bacteroidia_o__Bacteroidales_f__Rikenellaceae_g__AF12_s__	0	0	0	0	2	0	0	0	0	0	0	0		0	0	nd	nd	nd	0	0	0	0	0	0	0
k__Bacteria_p__Bacteroidetes_c__Bacteroidia_o__Bacteroidales_f__Rikenellaceae_g__Alistipes_s__indistinctus	0	0	0	0	0	0	0	6	0	0	0	0		2	0	nd	nd	nd	0	0	0	0	0	0	0
k__Bacteria_p__Bacteroidetes_c__Bacteroidia_o__Bacteroidales_f__Rikenellaceae_g__Blvii28_s__	0	0	0	0	0	27	0	41	0	0	0	5		0	0	nd	nd	nd	0	21	0	0	0	0	0
k__Bacteria_p__Bacteroidetes_c__Bacteroidia_o__Bacteroidales_f__Rikenellaceae_g__PW3_s__	0	8	90	9	4	21	33	8	21	12	37	18		0	0	nd	nd	nd	0	0	0	0	0	0	0
k__Bacteria_p__Bacteroidetes_c__Bacteroidia_o__Bacteroidales_f__Rikenellaceae_NA_NA	0	0	0	0	0	3	0	0	0	22	0	2		0	0	nd	nd	nd	0	0	0	0	4	0	0
k__Bacteria_p__Bacteroidetes_c__Bacteroidia_o__Bacteroidales_f__SB1_g___s__	9	0	0	0	25	33	9	86	83	49	6	9		0	0	nd	nd	nd	0	0	0	0	0	0	0
k__Bacteria_p__Bacteroidetes_c__Bacteroidia_o__Bacteroidales_NA_NA_NA	0	0	0	0	12	27	49	16	88	27	4	2		19	7	nd	nd	nd	113	16	0	31	56	132	108
k__Bacteria_p__Bacteroidetes_c__BME43_o___f___g___s__	0	0	15	0	7	11	0	0	0	5	16	23		12	0	nd	nd	nd	0	0	0	13	4	59	68
k__Bacteria_p__Bacteroidetes_c__Cytophagia_o__Cytophagales_f___g___s__	0	0	0	12	0	43	68	7	169	95	20	21		87	19	nd	nd	nd	133	37	0	63	49	0	48
k__Bacteria_p__Bacteroidetes_c__Cytophagia_o__Cytophagales_f__[Amoebophilaceae]_g__CandidatusAmoebophilus_s__	0	2	0	0	0	3	0	0	5	0	0	0		0	0	nd	nd	nd	0	0	0	0	0	0	0
k__Bacteria_p__Bacteroidetes_c__Cytophagia_o__Cytophagales_f__[Amoebophilaceae]_g__SC356_s__	0	0	0	0	3	0	0	74	0	12	0	0		0	0	nd	nd	nd	0	0	0	0	0	0	0
k__Bacteria_p__Bacteroidetes_c__Cytophagia_o__Cytophagales_f__[Amoebophilaceae]_NA_NA	0	0	0	0	0	0	8	0	0	0	0	0		0	0	nd	nd	nd	0	4	0	0	0	0	0
k__Bacteria_p__Bacteroidetes_c__Cytophagia_o__Cytophagales_f__Cyclobacteriaceae_g___s__	0	74	82	0	5	95	0	0	0	11	63	7		29	0	nd	nd	nd	0	0	0	0	0	0	0
k__Bacteria_p__Bacteroidetes_c__Cytophagia_o__Cytophagales_f__Cyclobacteriaceae_g__Algoriphagus_s__hitonicola	0	0	0	0	5	0	0	0	14	80	13	81		0	0	nd	nd	nd	0	0	0	0	0	0	0
k__Bacteria_p__Bacteroidetes_c__Cytophagia_o__Cytophagales_f__Cyclobacteriaceae_NA_NA	0	0	0	0	0	0	44	0	0	0	0	52		13	0	nd	nd	nd	0	0	0	0	0	0	0
k__Bacteria_p__Bacteroidetes_c__Cytophagia_o__Cytophagales_f__Cytophagaceae_g___s__	14	7603	4699	5755	8463	4580	1193	497	766	771	2810	2220		2391	108	nd	nd	nd	40	313	149	656	386	1177	1767
k__Bacteria_p__Bacteroidetes_c__Cytophagia_o__Cytophagales_f__Cytophagaceae_g__Cytophaga_s__	0	3	56	8	87	102	436	0	455	261	37	29		62	0	nd	nd	nd	315	561	0	177	233	72	253
k__Bacteria_p__Bacteroidetes_c__Cytophagia_o__Cytophagales_f__Cytophagaceae_g__Dyadobacter_s__	0	0	0	0	0	34	18	53	0	61	0	0		3	0	nd	nd	nd	946	542	10	116	17	0	11
k__Bacteria_p__Bacteroidetes_c__Cytophagia_o__Cytophagales_f__Cytophagaceae_g__Emticicia_s__	0	19	35	106	78	210	82	0	143	115	1014	135		0	0	nd	nd	nd	438	58	11	35	13	126	151
k__Bacteria_p__Bacteroidetes_c__Cytophagia_o__Cytophagales_f__Cytophagaceae_g__Flectobacillus_s__	0	60	0	103	87	839	293	156	263	119	86	551		69	33	nd	nd	nd	6108	1275	0	60	126	109	591
k__Bacteria_p__Bacteroidetes_c__Cytophagia_o__Cytophagales_f__Cytophagaceae_g__Flexibacter_s__ruber	0	2	22	0	0	0	11	0	0	0	0	8		31	0	nd	nd	nd	0	0	0	0	0	0	2
k__Bacteria_p__Bacteroidetes_c__Cytophagia_o__Cytophagales_f__Cytophagaceae_g__Hymenobacter_s__	0	0	0	0	2	7	22	0	5	27	6	59		0	0	nd	nd	nd	417	7	0	0	5	0	18
k__Bacteria_p__Bacteroidetes_c__Cytophagia_o__Cytophagales_f__Cytophagaceae_g__Leadbetterella_s__	0	41	35	94	366	521	183	0	21	144	39	254		39	5	nd	nd	nd	125	109	29	44	58	35	178
k__Bacteria_p__Bacteroidetes_c__Cytophagia_o__Cytophagales_f__Cytophagaceae_g__Rhodocytophaga_s__	0	0	0	0	0	0	0	0	6	0	0	0		0	0	nd	nd	nd	0	0	0	0	0	0	0
k__Bacteria_p__Bacteroidetes_c__Cytophagia_o__Cytophagales_f__Cytophagaceae_g__Rudanella_s__	0	16	76	17	11	18	73	49	0	0	20	0		230	38	nd	nd	nd	2417	477	41	376	498	257	114
k__Bacteria_p__Bacteroidetes_c__Cytophagia_o__Cytophagales_f__Cytophagaceae_g__Runella_s__	0	0	0	0	4	2	8	0	12	0	29	13		0	0	nd	nd	nd	37	0	0	0	39	18	99
k__Bacteria_p__Bacteroidetes_c__Cytophagia_o__Cytophagales_f__Cytophagaceae_g__Siphonobacter_s__aquaeclarae	0	0	0	0	0	0	6	0	0	8	0	0		0	0	nd	nd	nd	0	0	0	0	0	0	0
k__Bacteria_p__Bacteroidetes_c__Cytophagia_o__Cytophagales_f__Cytophagaceae_g__Spirosoma_s__	0	0	0	0	3	26	51	0	3	24	0	0		100	0	nd	nd	nd	1912	339	4	54	113	123	39
k__Bacteria_p__Bacteroidetes_c__Cytophagia_o__Cytophagales_f__Cytophagaceae_g__Sporocytophaga_s__	0	0	45	0	0	0	13	0	70	9	6	0		29	45	nd	nd	nd	0	0	0	0	22	91	8
k__Bacteria_p__Bacteroidetes_c__Cytophagia_o__Cytophagales_f__Cytophagaceae_NA_NA	0	2838	140	54	2	23	55	15	78	119	35	40		16	11	nd	nd	nd	0	0	0	0	189	184	352
k__Bacteria_p__Bacteroidetes_c__Cytophagia_o__Cytophagales_f__Flammeovirgaceae_g___s__	0	9	48	102	5	18	54	14	0	11	6	4		33	0	nd	nd	nd	0	12	0	0	45	33	72
k__Bacteria_p__Bacteroidetes_c__Cytophagia_o__Cytophagales_f__Flammeovirgaceae_g__Marinoscillum_s__furvescens	0	0	0	0	0	0	0	0	0	0	0	0		0	0	nd	nd	nd	0	0	0	0	0	0	0
k__Bacteria_p__Bacteroidetes_c__Cytophagia_o__Cytophagales_f__Flammeovirgaceae_g__Reichenbachiella_s__	0	0	0	0	0	0	0	6	0	0	0	0		10	0	nd	nd	nd	0	0	0	0	0	17	8
k__Bacteria_p__Bacteroidetes_c__Cytophagia_o__Cytophagales_f__Flammeovirgaceae_NA_NA	0	0	0	0	0	0	9	0	12	0	2	0		0	0	nd	nd	nd	0	0	0	8	0	0	4
k__Bacteria_p__Bacteroidetes_c__Cytophagia_o__Cytophagales_NA_NA_NA	0	17	43	6	9	46	102	25	90	92	31	33		529	17	nd	nd	nd	22	68	0	39	44	72	210
k__Bacteria_p__Bacteroidetes_c__Flavobacteriia_o__Flavobacteriales_f___g___s__	0	0	34	0	0	4	0	0	0	0	0	0		31	0	nd	nd	nd	8	10	0	0	0	0	10
k__Bacteria_p__Bacteroidetes_c__Flavobacteriia_o__Flavobacteriales_f__[Weeksellaceae]_g___s__	0	4	0	0	0	5	0	0	291	97	27	0		0	0	nd	nd	nd	0	0	0	0	11	57	0
k__Bacteria_p__Bacteroidetes_c__Flavobacteriia_o__Flavobacteriales_f__[Weeksellaceae]_g__Chryseobacterium_s__	0	4	19	15	0	13	5	100	15	8	22	33		123	0	nd	nd	nd	121	75	17	45	4	17	13
k__Bacteria_p__Bacteroidetes_c__Flavobacteriia_o__Flavobacteriales_f__[Weeksellaceae]_g__Cloacibacterium_s__	0	0	102	0	0	7	2	0	0	0	0	0		18	23	nd	nd	nd	0	0	0	0	0	0	0
k__Bacteria_p__Bacteroidetes_c__Flavobacteriia_o__Flavobacteriales_f__[Weeksellaceae]_g__Elizabethkingia_s__meningoseptica	0	12	0	0	0	0	0	0	0	0	0	0		0	0	nd	nd	nd	0	129	0	0	0	0	0
k__Bacteria_p__Bacteroidetes_c__Flavobacteriia_o__Flavobacteriales_f__[Weeksellaceae]_g__Weeksella_NA	0	0	0	0	0	0	0	0	6	0	0	0		0	0	nd	nd	nd	0	0	0	30	24	23	0
k__Bacteria_p__Bacteroidetes_c__Flavobacteriia_o__Flavobacteriales_f__[Weeksellaceae]_g__Weeksella_s__virosa	0	0	0	0	0	0	0	0	0	13	9	0		0	0	nd	nd	nd	0	0	0	42	51	0	4
k__Bacteria_p__Bacteroidetes_c__Flavobacteriia_o__Flavobacteriales_f__[Weeksellaceae]_NA_NA	0	0	0	0	0	8	0	0	0	0	0	0		0	0	nd	nd	nd	0	0	0	0	0	0	0
k__Bacteria_p__Bacteroidetes_c__Flavobacteriia_o__Flavobacteriales_f__Cryomorphaceae_g___s__	0	785	422	693	936	286	45	0	26	74	59	169		84	15	nd	nd	nd	0	15	0	39	11	287	417
k__Bacteria_p__Bacteroidetes_c__Flavobacteriia_o__Flavobacteriales_f__Cryomorphaceae_g__Crocinitomix_s__	0	6	0	0	0	0	23	0	0	0	0	0		0	0	nd	nd	nd	0	0	0	7	0	3	19
k__Bacteria_p__Bacteroidetes_c__Flavobacteriia_o__Flavobacteriales_f__Cryomorphaceae_g__Fluviicola_s__	0	13886	6599	10852	3564	6368	1128	494	1286	521	5316	2386		67	12	nd	nd	nd	28	176	244	67	42	15	44
k__Bacteria_p__Bacteroidetes_c__Flavobacteriia_o__Flavobacteriales_f__Cryomorphaceae_g__Wandonia_s__	0	0	0	0	0	0	0	0	0	6	0	0		0	0	nd	nd	nd	0	0	0	0	0	0	0
k__Bacteria_p__Bacteroidetes_c__Flavobacteriia_o__Flavobacteriales_f__Cryomorphaceae_NA_NA	0	0	8	7	0	0	0	0	0	0	0	0		3	0	nd	nd	nd	0	0	0	0	0	0	0
k__Bacteria_p__Bacteroidetes_c__Flavobacteriia_o__Flavobacteriales_f__Flavobacteriaceae_g___s__	0	0	0	0	0	0	0	0	0	4	0	0		0	0	nd	nd	nd	0	0	0	0	2	0	0
k__Bacteria_p__Bacteroidetes_c__Flavobacteriia_o__Flavobacteriales_f__Flavobacteriaceae_g__Flavobacterium_NA	0	34	61	0	0	70	11	0	252	61	0	70		0	0	nd	nd	nd	0	0	0	0	0	98	21
k__Bacteria_p__Bacteroidetes_c__Flavobacteriia_o__Flavobacteriales_f__Flavobacteriaceae_g__Flavobacterium_s__	4	1421	330	1432	2394	3722	1519	234	1508	1099	1524	4829		182	0	nd	nd	nd	1108	966	66	350	219	513	449
k__Bacteria_p__Bacteroidetes_c__Flavobacteriia_o__Flavobacteriales_f__Flavobacteriaceae_g__Flavobacterium_s__columnare	0	27	341	88	17	33	24	146	0	51	0	0		0	95	nd	nd	nd	249	0	0	0	0	0	0
k__Bacteria_p__Bacteroidetes_c__Flavobacteriia_o__Flavobacteriales_f__Flavobacteriaceae_g__Flavobacterium_s__frigidarium	0	0	107	0	0	13	0	0	115	65	28	0		0	0	nd	nd	nd	0	0	0	0	0	0	0
k__Bacteria_p__Bacteroidetes_c__Flavobacteriia_o__Flavobacteriales_f__Flavobacteriaceae_g__Flavobacterium_s__gelidilacus	0	0	0	32	0	22	0	0	0	0	7	30		0	0	nd	nd	nd	0	0	0	0	0	0	0
k__Bacteria_p__Bacteroidetes_c__Flavobacteriia_o__Flavobacteriales_f__Flavobacteriaceae_g__Flavobacterium_s__succinicans	39	5896	2572	7539	3092	14439	1811	985	6354	2848	9687	6092		346	113	nd	nd	nd	2523	4729	1340	689	358	377	820
k__Bacteria_p__Bacteroidetes_c__Flavobacteriia_o__Flavobacteriales_f__Flavobacteriaceae_g__Myroides_s__	0	0	0	0	0	0	0	0	0	0	0	0		0	0	nd	nd	nd	0	0	0	0	0	0	0
k__Bacteria_p__Bacteroidetes_c__Flavobacteriia_o__Flavobacteriales_f__Flavobacteriaceae_NA_NA	0	0	0	0	5	8	3	0	0	14	12	0		19	0	nd	nd	nd	0	0	0	0	0	0	6
k__Bacteria_p__Bacteroidetes_c__Flavobacteriia_o__Flavobacteriales_NA_NA_NA	0	0	4	0	0	17	0	35	0	31	0	3		0	0	nd	nd	nd	53	0	0	0	3	0	0
k__Bacteria_p__Bacteroidetes_c__SM1A07_o___f___g___s__	0	0	0	9	0	0	0	0	0	0	0	0		31	0	nd	nd	nd	0	0	0	0	3	0	0
k__Bacteria_p__Bacteroidetes_c__Sphingobacteriia_o__Sphingobacteriales____g___s__	0	0	0	0	0	0	0	0	0	0	0	0		0	0	nd	nd	nd	0	0	0	0	0	0	0
k__Bacteria_p__Bacteroidetes_c__Sphingobacteriia_o__Sphingobacteriales_f___g___s__	258	6565	3467	5467	1445	1094	2160	810	1962	2019	769	1219		3223	577	nd	nd	nd	212	1230	29	952	883	1648	1424
k__Bacteria_p__Bacteroidetes_c__Sphingobacteriia_o__Sphingobacteriales_f__Sphingobacteriaceae_g___s__	0	18	123	8	111	89	138	0	438	293	90	73		95	87	nd	nd	nd	1333	1136	67	135	19	42	0
k__Bacteria_p__Bacteroidetes_c__Sphingobacteriia_o__Sphingobacteriales_f__Sphingobacteriaceae_g__Mucilaginibacter_s__daejeonensis	0	5	0	0	0	0	0	0	0	0	0	0		0	0	nd	nd	nd	127	61	0	0	0	0	0
k__Bacteria_p__Bacteroidetes_c__Sphingobacteriia_o__Sphingobacteriales_f__Sphingobacteriaceae_g__Mucilaginibacter_s__gracilis	0	0	0	0	0	0	0	0	0	24	0	0		0	0	nd	nd	nd	0	0	0	0	0	0	0
k__Bacteria_p__Bacteroidetes_c__Sphingobacteriia_o__Sphingobacteriales_f__Sphingobacteriaceae_g__Mucilaginibacter_s__ximonensis	0	0	0	0	0	0	0	0	0	14	0	0		0	0	nd	nd	nd	0	0	0	0	0	0	0
k__Bacteria_p__Bacteroidetes_c__Sphingobacteriia_o__Sphingobacteriales_f__Sphingobacteriaceae_g__Pedobacter_NA	0	0	0	0	0	0	0	102	53	0	0	0		0	0	nd	nd	nd	4	473	0	106	0	0	0
k__Bacteria_p__Bacteroidetes_c__Sphingobacteriia_o__Sphingobacteriales_f__Sphingobacteriaceae_g__Pedobacter_s__	0	104	16	141	59	111	91	47	119	165	57	396		79	49	nd	nd	nd	1459	691	228	705	124	191	0
k__Bacteria_p__Bacteroidetes_c__Sphingobacteriia_o__Sphingobacteriales_f__Sphingobacteriaceae_g__Pedobacter_s__cryoconitis	0	0	0	0	0	18	0	0	84	19	0	0		0	42	nd	nd	nd	82	322	0	623	38	39	146
k__Bacteria_p__Bacteroidetes_c__Sphingobacteriia_o__Sphingobacteriales_f__Sphingobacteriaceae_g__Pedobacter_s__glucosidilyticus	0	0	0	0	0	0	0	0	0	0	0	69		0	0	nd	nd	nd	0	0	0	0	0	0	0
k__Bacteria_p__Bacteroidetes_c__Sphingobacteriia_o__Sphingobacteriales_f__Sphingobacteriaceae_g__Solitalea_s__canadensis	0	0	46	0	0	0	0	0	0	0	0	0		0	4	nd	nd	nd	5	2	0	0	24	0	0
k__Bacteria_p__Bacteroidetes_c__Sphingobacteriia_o__Sphingobacteriales_f__Sphingobacteriaceae_g__Sphingobacterium_s__	0	0	0	0	0	0	0	0	0	7	0	0		0	0	nd	nd	nd	0	0	0	10	0	0	0
k__Bacteria_p__Bacteroidetes_c__Sphingobacteriia_o__Sphingobacteriales_f__Sphingobacteriaceae_g__Sphingobacterium_s__faecium	0	0	67	0	0	0	0	0	0	0	0	0		0	0	nd	nd	nd	0	0	0	9	0	0	6
k__Bacteria_p__Bacteroidetes_c__Sphingobacteriia_o__Sphingobacteriales_f__Sphingobacteriaceae_g__Sphingobacterium_s__multivorum	0	0	0	0	3	15	0	0	0	0	0	0		0	0	nd	nd	nd	0	0	0	0	0	0	0
k__Bacteria_p__Bacteroidetes_c__Sphingobacteriia_o__Sphingobacteriales_f__Sphingobacteriaceae_NA_NA	0	0	0	0	11	17	0	0	60	0	0	0		0	0	nd	nd	nd	0	52	0	37	0	0	0
k__Bacteria_p__Bacteroidetes_c__Sphingobacteriia_o__Sphingobacteriales_NA_NA_NA	0	0	0	0	0	5	0	0	0	0	0	0		0	0	nd	nd	nd	0	0	0	10	0	0	0
k__Bacteria_p__Bacteroidetes_c__VC2_1_Bac22_o___f___g___s__	0	0	42	0	2	0	0	0	0	0	3	0		0	0	nd	nd	nd	0	41	0	4	0	12	3
k__Bacteria_p__Bacteroidetes_NA_NA_NA_NA_NA	0	66	185	69	41	65	420	101	245	157	64	90		530	47	nd	nd	nd	1131	279	71	72	123	533	229
k__Bacteria_p__BHI80139_c___o___f___g___s__	57	0	0	0	0	0	0	0	13	16	0	0		0	0	nd	nd	nd	0	0	0	0	0	0	0
k__Bacteria_p__BRC1_c__PRR11_o___f___g___s__	0	0	19	0	0	0	0	0	29	9	0	0		21	0	nd	nd	nd	0	0	0	0	0	0	0
k__Bacteria_p__Caldiserica_c__OP5_o__WCHB102_f___g___s__	0	0	0	0	0	0	0	0	0	0	0	2		0	0	nd	nd	nd	0	0	0	0	0	0	0
k__Bacteria_p__Chlamydiae_c__Chlamydiia_NA_NA_NA_NA	4	0	0	0	5	23	0	0	0	0	0	0		0	0	nd	nd	nd	0	0	0	0	0	0	0
k__Bacteria_p__Chlamydiae_c__Chlamydiia_o___f___g___s__	0	0	0	0	0	0	0	66	0	6	0	0		0	0	nd	nd	nd	0	0	0	7	0	0	0
k__Bacteria_p__Chlamydiae_c__Chlamydiia_o__Chlamydiales_f___g___s__	108	6	57	17	98	86	159	0	140	170	0	0		143	48	nd	nd	nd	7	22	0	97	59	243	0
k__Bacteria_p__Chlamydiae_c__Chlamydiia_o__Chlamydiales_f__Chlamydiaceae_g__Chlamydia_NA	0	0	0	0	2	0	0	0	0	0	0	0		0	17	nd	nd	nd	0	0	0	0	0	0	0
k__Bacteria_p__Chlamydiae_c__Chlamydiia_o__Chlamydiales_f__Chlamydiaceae_g__Chlamydia_s__pneumoniae	0	0	0	0	0	0	0	0	0	8	0	0		0	0	nd	nd	nd	0	0	0	0	0	0	0
k__Bacteria_p__Chlamydiae_c__Chlamydiia_o__Chlamydiales_f__Criblamydiaceae_g__Estrella_s__lausannensis	0	0	0	0	0	6	5	0	0	0	0	0		0	0	nd	nd	nd	0	0	0	0	0	0	0
k__Bacteria_p__Chlamydiae_c__Chlamydiia_o__Chlamydiales_f__Parachlamydiaceae_g___s__	0	0	17	21	0	20	73	6	36	62	16	7		66	0	nd	nd	nd	0	69	0	21	2	5	0
k__Bacteria_p__Chlamydiae_c__Chlamydiia_o__Chlamydiales_f__Parachlamydiaceae_g__CandidatusProtochlamydia_s__	0	0	0	2	10	0	0	0	11	41	17	0		8	0	nd	nd	nd	0	0	0	0	0	0	0
k__Bacteria_p__Chlamydiae_c__Chlamydiia_o__Chlamydiales_f__Parachlamydiaceae_g__Parachlamydia_NA	0	0	0	0	0	0	0	0	0	0	11	7		0	0	nd	nd	nd	0	0	39	0	0	32	0
k__Bacteria_p__Chlamydiae_c__Chlamydiia_o__Chlamydiales_f__Parachlamydiaceae_g__Parachlamydia_s__	0	0	0	0	0	0	34	15	0	0	6	14		6	0	nd	nd	nd	0	0	0	0	15	188	15
k__Bacteria_p__Chlamydiae_c__Chlamydiia_o__Chlamydiales_f__Parachlamydiaceae_NA_NA	0	0	0	6	22	10	13	0	34	60	8	0		15	42	nd	nd	nd	0	20	0	0	0	0	25
k__Bacteria_p__Chlamydiae_c__Chlamydiia_o__Chlamydiales_f__Rhabdochlamydiaceae_g__CandidatusRhabdochlamydia_s__	62	21	31	4	172	17	160	0	90	126	9	9		8	0	nd	nd	nd	0	0	0	0	0	0	0
k__Bacteria_p__Chlamydiae_c__Chlamydiia_o__Chlamydiales_f__Simkaniaceae_g__Simkania_s__negevensis	0	8	0	0	0	0	0	0	0	0	0	0		0	0	nd	nd	nd	0	0	0	0	0	0	0
k__Bacteria_p__Chlamydiae_c__Chlamydiia_o__Chlamydiales_f__Simkaniaceae_NA_NA	0	0	0	8	6	25	15	0	0	19	0	0		0	0	nd	nd	nd	0	0	0	5	0	0	0
k__Bacteria_p__Chlamydiae_c__Chlamydiia_o__Chlamydiales_f__Waddliaceae_NA_NA	0	0	8	0	0	0	0	0	3	0	0	0		0	0	nd	nd	nd	0	0	0	0	0	0	0
k__Bacteria_p__Chlamydiae_c__Chlamydiia_o__Chlamydiales_NA_NA_NA	50	66	51	0	50	11	48	0	48	77	0	27		89	162	nd	nd	nd	7	63	20	34	20	70	25
k__Bacteria_p__Chlorobi_c___o___f___g___s__	0	0	0	0	17	10	0	0	0	0	0	0		40	0	nd	nd	nd	4	0	0	18	5	0	0
k__Bacteria_p__Chlorobi_c__BSV26_o__A89_f___g___s__	10	0	123	0	3	0	8	0	0	76	0	0		0	0	nd	nd	nd	0	0	0	4	0	0	3
k__Bacteria_p__Chlorobi_c__BSV26_o__C20_f___g___s__	0	0	0	0	5	3	0	0	0	26	0	0		0	0	nd	nd	nd	0	0	0	0	0	0	0
k__Bacteria_p__Chlorobi_c__BSV26_o__PK329_f___g___s__	0	0	24	0	0	0	2	0	28	79	0	0		9	0	nd	nd	nd	0	0	29	23	8	14	17
k__Bacteria_p__Chlorobi_c__BSV26_o__VC38_f___g___s__	0	0	0	0	2	0	12	0	36	13	0	0		0	0	nd	nd	nd	0	0	0	0	0	0	0
k__Bacteria_p__Chlorobi_c__Chlorobia_o__[Chloroherpetales]_f___g___s__	0	0	0	3	0	0	0	0	0	0	0	0		0	0	nd	nd	nd	0	0	0	0	0	0	0
k__Bacteria_p__Chlorobi_c__Chlorobia_o__Chlorobiales_f__Chlorobiaceae_g___s__	0	0	0	0	0	0	0	0	0	0	0	0		0	0	nd	nd	nd	0	0	0	0	0	0	0
k__Bacteria_p__Chlorobi_c__Ignavibacteria_o__Ignavibacteriales_f__[Melioribacteraceae]_g___s__	0	0	0	0	0	4	0	0	0	0	0	0		0	0	nd	nd	nd	0	0	0	0	0	0	0
k__Bacteria_p__Chlorobi_c__Ignavibacteria_o__Ignavibacteriales_f__Ignavibacteriaceae_g___s__	0	0	0	0	4	0	22	0	0	28	0	0		48	0	nd	nd	nd	0	0	0	0	0	21	0
k__Bacteria_p__Chlorobi_c__Ignavibacteria_o__Ignavibacteriales_NA_NA_NA	0	0	0	0	0	0	10	0	0	0	0	0		0	0	nd	nd	nd	0	0	0	0	0	0	0
k__Bacteria_p__Chlorobi_c__OPB56_o___f___g___s__	4	0	78	6	27	53	40	0	15	92	34	26		507	62	nd	nd	nd	27	16	0	21	4	58	98
k__Bacteria_p__Chlorobi_c__SJA28_o___f___g___s__	0	0	2	0	9	0	2	0	23	14	3	0		0	0	nd	nd	nd	0	0	0	0	0	0	0
k__Bacteria_p__Chlorobi_NA_NA_NA_NA_NA	0	0	0	0	0	0	0	0	0	0	5	0		0	0	nd	nd	nd	0	0	0	0	0	0	0
k__Bacteria_p__Chloroflexi_c___o___f___g___s__	0	0	0	0	0	24	0	8	0	7	0	0		75	8	nd	nd	nd	6	0	0	10	12	0	0
k__Bacteria_p__Chloroflexi_c__Anaerolineae_NA_NA_NA_NA	0	0	0	0	6	24	26	34	32	26	4	0		38	171	nd	nd	nd	0	0	0	18	20	46	8
k__Bacteria_p__Chloroflexi_c__Anaerolineae_o___f___g___s__	0	0	24	0	0	0	0	0	0	24	0	0		23	8	nd	nd	nd	0	0	0	31	36	0	17
k__Bacteria_p__Chloroflexi_c__Anaerolineae_o__A31_f___g___s__	0	0	0	0	0	0	0	0	50	26	0	0		0	0	nd	nd	nd	0	0	0	0	0	0	0
k__Bacteria_p__Chloroflexi_c__Anaerolineae_o__A31_f__S47_g___s__	0	0	7	0	0	0	11	0	25	77	0	0		69	0	nd	nd	nd	0	15	0	20	21	131	6
k__Bacteria_p__Chloroflexi_c__Anaerolineae_o__Anaerolineales_f__Anaerolinaceae_g___s__	0	0	0	0	0	0	0	0	0	16	0	0		0	0	nd	nd	nd	0	0	0	12	0	0	0
k__Bacteria_p__Chloroflexi_c__Anaerolineae_o__Anaerolineales_f__Anaerolinaceae_g__Anaerolinea_s__	0	0	0	0	0	0	10	0	0	0	0	0		0	0	nd	nd	nd	0	0	0	0	0	0	0
k__Bacteria_p__Chloroflexi_c__Anaerolineae_o__Anaerolineales_f__Anaerolinaceae_g__Anaerolinea_s__thermolimosa	0	0	0	0	0	0	0	0	0	8	0	0		0	0	nd	nd	nd	0	0	0	0	0	0	0
k__Bacteria_p__Chloroflexi_c__Anaerolineae_o__Anaerolineales_f__Anaerolinaceae_g__SHD231_s__	0	0	0	0	0	3	0	0	0	0	0	0		0	0	nd	nd	nd	0	0	0	0	0	0	0
k__Bacteria_p__Chloroflexi_c__Anaerolineae_o__Ardenscatenales_f__Ardenscatenaceae_g__Ardenscatena_s__	0	0	0	5	0	0	19	0	0	0	0	0		5	0	nd	nd	nd	0	6	0	36	0	0	0
k__Bacteria_p__Chloroflexi_c__Anaerolineae_o__Caldilineales_f__Caldilineaceae_g___s__	0	0	0	6	0	0	30	0	4	0	0	0		49	0	nd	nd	nd	17	52	0	4	8	21	0
k__Bacteria_p__Chloroflexi_c__Anaerolineae_o__Caldilineales_f__Caldilineaceae_g__Caldilinea_s__	0	0	0	0	0	9	0	0	0	25	0	0		24	0	nd	nd	nd	0	7	0	9	0	0	10
k__Bacteria_p__Chloroflexi_c__Anaerolineae_o__Caldilineales_f__Caldilineaceae_NA_NA	0	0	0	0	0	0	0	0	0	0	0	2		0	0	nd	nd	nd	0	0	0	0	0	0	0
k__Bacteria_p__Chloroflexi_c__Anaerolineae_o__CFB26_f___g___s__	0	0	4	0	5	0	3	0	0	14	2	0		3	0	nd	nd	nd	0	0	0	0	0	0	0
k__Bacteria_p__Chloroflexi_c__Anaerolineae_o__DRC31_f___g___s__	0	0	32	0	0	0	5	0	0	0	0	0		13	0	nd	nd	nd	0	0	0	4	7	12	0
k__Bacteria_p__Chloroflexi_c__Anaerolineae_o__envOPS12_f___g___s__	0	4	72	0	6	11	0	0	0	45	0	0		0	0	nd	nd	nd	0	12	0	5	0	0	0
k__Bacteria_p__Chloroflexi_c__Anaerolineae_o__GCA004_f___g___s__	0	2	83	0	18	11	2	0	25	79	0	0		34	0	nd	nd	nd	0	48	0	13	0	89	6
k__Bacteria_p__Chloroflexi_c__Anaerolineae_o__H39_f___g___s__	0	3	27	0	26	29	36	99	0	50	0	0		14	0	nd	nd	nd	5	9	46	133	43	90	40
k__Bacteria_p__Chloroflexi_c__Anaerolineae_o__pLW97_f___g___s__	0	0	15	0	0	0	0	0	12	0	0	0		0	0	nd	nd	nd	0	0	0	0	0	0	0
k__Bacteria_p__Chloroflexi_c__Anaerolineae_o__S0208_f___g___s__	0	0	15	0	8	0	2	0	0	8	0	0		0	0	nd	nd	nd	0	19	0	27	19	18	0
k__Bacteria_p__Chloroflexi_c__Anaerolineae_o__SB34_f___g___s__	0	0	129	0	0	0	0	0	0	10	0	0		0	0	nd	nd	nd	0	0	0	0	0	0	0
k__Bacteria_p__Chloroflexi_c__Anaerolineae_o__SBR1031_f__A4b_g___s__	0	126	231	36	59	73	84	137	150	190	8	2		957	579	nd	nd	nd	166	667	27	533	143	665	114
k__Bacteria_p__Chloroflexi_c__Anaerolineae_o__SBR1031_f__oc28_g___s__	0	0	2	2	0	0	16	0	4	28	0	0		38	45	nd	nd	nd	47	118	0	22	42	35	2
k__Bacteria_p__Chloroflexi_c__Anaerolineae_o__SBR1031_f__SJA101_g___s__	0	0	64	0	3	0	19	0	0	5	0	0		45	0	nd	nd	nd	0	0	0	0	0	0	0
k__Bacteria_p__Chloroflexi_c__Anaerolineae_o__SBR1031_NA_NA_NA	0	0	0	0	0	3	0	0	0	9	0	0		0	0	nd	nd	nd	0	0	0	18	0	0	0
k__Bacteria_p__Chloroflexi_c__Anaerolineae_o__SHA20_f___g___s__	0	0	0	0	0	0	28	0	0	6	0	0		0	0	nd	nd	nd	0	0	0	0	0	0	0
k__Bacteria_p__Chloroflexi_c__Anaerolineae_o__SJA15_f___g___s__	0	0	0	0	0	0	6	0	20	7	0	0		5	0	nd	nd	nd	0	0	0	0	0	0	0
k__Bacteria_p__Chloroflexi_c__Anaerolineae_o__WCHB150_f___g___s__	0	0	0	0	2	0	50	0	4	0	0	0		157	0	nd	nd	nd	0	0	0	0	0	0	0
k__Bacteria_p__Chloroflexi_c__C0119_o___f___g___s__	0	0	0	9	2	0	4	0	0	2	0	0		0	0	nd	nd	nd	0	212	0	0	0	0	0
k__Bacteria_p__Chloroflexi_c__Chloroflexi_o__[Roseiflexales]_f___g___s__	0	0	38	0	11	16	0	0	6	22	0	0		16	21	nd	nd	nd	0	0	0	7	9	43	0
k__Bacteria_p__Chloroflexi_c__Chloroflexi_o__[Roseiflexales]_f__[Kouleothrixaceae]_g___s__	0	0	0	0	0	0	0	0	0	27	0	0		0	0	nd	nd	nd	4	33	0	8	0	10	0
k__Bacteria_p__Chloroflexi_c__Chloroflexi_o__[Roseiflexales]_NA_NA_NA	0	0	0	0	9	0	0	31	0	0	0	0		165	0	nd	nd	nd	0	0	0	38	3	164	0
k__Bacteria_p__Chloroflexi_c__Chloroflexi_o__Chloroflexales_f__Chloroflexaceae_g___s__	0	0	0	0	0	0	0	116	0	0	0	0		27	0	nd	nd	nd	0	9	0	5	4	123	0
k__Bacteria_p__Chloroflexi_c__Chloroflexi_o__Chloroflexales_f__Chloroflexaceae_g__Chloronema_s__	0	0	0	0	5	0	0	0	0	0	0	0		306	26	nd	nd	nd	27	72	0	82	44	141	16
k__Bacteria_p__Chloroflexi_c__Chloroflexi_o__Chloroflexales_f__Chloroflexaceae_NA_NA	0	0	0	0	0	0	8	0	0	0	0	3		0	0	nd	nd	nd	0	0	0	58	0	0	0
k__Bacteria_p__Chloroflexi_c__Chloroflexi_o__Chloroflexales_f__FFCH7168_g___s__	0	0	0	0	0	0	4	0	0	0	0	0		0	0	nd	nd	nd	0	0	0	0	0	0	0
k__Bacteria_p__Chloroflexi_c__Chloroflexi_o__Chloroflexales_f__Oscillochloridaceae_g__Oscillochloris_s__	0	0	0	0	0	14	0	0	0	0	0	0		43	0	nd	nd	nd	0	18	0	24	21	0	9
k__Bacteria_p__Chloroflexi_c__Chloroflexi_o__Chloroflexales_NA_NA_NA	0	0	0	0	0	0	0	17	0	0	0	0		16	0	nd	nd	nd	0	9	0	15	6	36	0
k__Bacteria_p__Chloroflexi_c__Chloroflexi_o__Herpetosiphonales_f___g___s__	0	0	0	6	0	0	11	0	0	0	0	0		3	169	nd	nd	nd	0	0	0	0	0	37	0
k__Bacteria_p__Chloroflexi_c__Dehalococcoidetes_NA_NA_NA_NA	0	0	0	0	0	5	0	0	0	0	0	0		0	0	nd	nd	nd	0	0	0	0	0	0	0
k__Bacteria_p__Chloroflexi_c__Dehalococcoidetes_o___f___g___s__	0	0	0	0	0	0	0	0	0	6	0	4		0	0	nd	nd	nd	0	0	0	0	0	0	0
k__Bacteria_p__Chloroflexi_c__Dehalococcoidetes_o__Dehalococcoidales_f___g___s__	0	0	0	0	8	15	0	0	0	41	0	0		0	0	nd	nd	nd	0	0	20	0	0	3	0
k__Bacteria_p__Chloroflexi_c__Dehalococcoidetes_o__Dehalococcoidales_f__Dehalococcoidaceae_g___s__	0	11	0	0	0	0	0	0	52	10	0	0		0	0	nd	nd	nd	0	0	0	0	0	0	0
k__Bacteria_p__Chloroflexi_c__Dehalococcoidetes_o__Dehalococcoidales_NA_NA_NA	0	0	0	0	2	0	0	0	0	0	0	0		0	0	nd	nd	nd	0	0	0	0	0	0	0
k__Bacteria_p__Chloroflexi_c__Dehalococcoidetes_o__GIF9_f___g___s__	0	0	0	0	7	0	0	0	0	9	0	0		0	0	nd	nd	nd	0	0	0	0	0	0	0
k__Bacteria_p__Chloroflexi_c__Ellin6529_o___f____0	0	0	0	0	0	0	0	0	0	0	0	0		0	0	nd	nd	nd	0	0	0	0	0	0	0
k__Bacteria_p__Chloroflexi_c__Ellin6529_o___f___g___s__	46	72	130	0	82	170	179	438	102	153	13	0		738	137	nd	nd	nd	5	170	139	295	298	480	26
k__Bacteria_p__Chloroflexi_c__GittGS136_o___f___g___s__	0	0	16	2	2	14	13	0	6	43	5	0		7	0	nd	nd	nd	0	0	0	0	0	0	0
k__Bacteria_p__Chloroflexi_c__Ktedonobacteria_NA_NA_NA_NA	0	0	0	0	0	0	0	0	0	0	0	0		0	0	nd	nd	nd	0	0	0	0	0	0	0
k__Bacteria_p__Chloroflexi_c__Ktedonobacteria_o__JG30KFAS9_f___g___s__	0	0	0	0	0	12	0	0	0	0	0	0		0	0	nd	nd	nd	0	0	0	0	0	0	0
k__Bacteria_p__Chloroflexi_c__Ktedonobacteria_o__Ktedonobacterales_f__Ktedonobacteraceae_g___s__	0	0	6	0	0	0	0	0	7	0	3	0		0	0	nd	nd	nd	0	0	0	0	0	0	0
k__Bacteria_p__Chloroflexi_c__Ktedonobacteria_o__Thermogemmatisporales_f__Thermogemmatisporaceae_g___s__	0	0	0	0	0	0	0	0	0	3	0	0		0	0	nd	nd	nd	0	0	0	0	0	0	0
k__Bacteria_p__Chloroflexi_c__P211E_o___f___g___s__	0	0	0	0	5	0	0	0	0	0	0	0		0	0	nd	nd	nd	0	0	0	0	0	0	0
k__Bacteria_p__Chloroflexi_c__S085_o___f___g___s__	0	0	120	9	15	36	43	0	76	170	7	0		307	92	nd	nd	nd	7	107	88	120	93	359	28
k__Bacteria_p__Chloroflexi_c__SAR202_o___f___g___s__	0	0	0	0	0	0	7	19	23	0	0	2		0	0	nd	nd	nd	0	6	0	0	0	0	0
k__Bacteria_p__Chloroflexi_c__Thermomicrobia_o___f___g___s__	0	0	0	0	14	0	9	0	0	30	0	0		0	0	nd	nd	nd	0	0	0	0	0	0	0
k__Bacteria_p__Chloroflexi_c__Thermomicrobia_o__AKYG1722_f___g___s__	0	0	23	0	0	0	0	0	0	0	0	0		18	0	nd	nd	nd	0	0	0	0	0	7	0
k__Bacteria_p__Chloroflexi_c__Thermomicrobia_o__Ellin6537_f___g___s__	0	0	0	0	0	0	6	47	0	8	0	0		13	0	nd	nd	nd	119	142	0	34	2	24	0
k__Bacteria_p__Chloroflexi_c__Thermomicrobia_o__JG30KFCM45_f___g___s__	0	6	46	4	4	0	34	74	29	42	4	0		57	0	nd	nd	nd	0	0	0	0	0	0	0
k__Bacteria_p__Chloroflexi_c__TK10_o___f___g___s__	0	0	0	0	0	0	6	0	18	17	0	0		0	0	nd	nd	nd	4	0	0	0	0	6	0
k__Bacteria_p__Chloroflexi_c__TK10_o__AKYG885_f___g___s__	0	0	17	0	0	0	0	0	0	0	0	0		0	0	nd	nd	nd	0	63	0	27	0	0	0
k__Bacteria_p__Chloroflexi_c__TK10_o__AKYG885_f__5B12_g___s__	0	0	20	0	0	0	0	0	0	0	0	0		0	0	nd	nd	nd	0	0	0	0	0	0	0
k__Bacteria_p__Chloroflexi_c__TK10_o__AKYG885_f__Dolo_23_g___s__	0	0	0	0	0	0	31	0	87	29	0	0		43	18	nd	nd	nd	62	248	7	76	39	115	0
k__Bacteria_p__Chloroflexi_c__TK10_o__B07_WMSP1_f__FFCH4570_g___s__	0	0	0	0	0	0	0	0	11	0	0	0		0	0	nd	nd	nd	0	0	0	5	0	0	0
k__Bacteria_p__Chloroflexi_c__TK17_o___f___g___s__	0	0	0	0	14	0	0	0	26	7	0	0		0	0	nd	nd	nd	0	0	0	3	8	0	0
k__Bacteria_p__Chloroflexi_c__TK17_o__mle148_f___g___s__	0	0	24	0	0	6	18	0	0	30	0	0		29	0	nd	nd	nd	0	0	0	0	0	0	0
k__Bacteria_p__Chloroflexi_NA_NA_NA_NA_NA	0	3	0	6	3	6	13	19	4	29	5	0		146	45	nd	nd	nd	14	16	0	90	11	42	13
k__Bacteria_p__Cyanobacteria_c___o___f___g___s__	0	0	0	0	42	0	11	0	0	10	4	0		0	0	nd	nd	nd	0	0	88	0	0	0	0
k__Bacteria_p__Cyanobacteria_c__4C0d2_o__MLE112_f___g___s__	40	6	0	0	21	41	55	0	121	210	3	7		52	0	nd	nd	nd	0	0	0	0	0	0	0
k__Bacteria_p__Cyanobacteria_c__4C0d2_o__SM1D11_f___g___s__	0	24	0	0	45	0	0	29	0	91	0	0		0	0	nd	nd	nd	0	0	0	0	0	0	0
k__Bacteria_p__Cyanobacteria_c__4C0d2_o__SM2F09_f___g___s__	0	0	0	0	0	0	0	0	0	7	0	0		0	0	nd	nd	nd	0	0	0	0	0	0	0
k__Bacteria_p__Cyanobacteria_c__4C0d2_o__YS2_f___g___s__	0	16	0	0	11	71	57	0	64	53	10	19		4	0	nd	nd	nd	0	0	0	0	0	0	0
k__Bacteria_p__Cyanobacteria_c__ML635J21_o___f___g___s__	0	0	3	0	3	14	42	0	59	55	7	20		108	0	nd	nd	nd	0	0	0	0	0	0	0
k__Bacteria_p__Cyanobacteria_c__Nostocophycideae_o___f___g___s__	0	0	0	0	0	0	23	0	0	13	0	2		14	0	nd	nd	nd	0	0	0	160	44	78	15
k__Bacteria_p__Cyanobacteria_c__Nostocophycideae_o__Nostocales_f___g___s__	0	0	0	0	0	0	0	0	0	0	0	0		0	0	nd	nd	nd	0	0	0	0	0	0	0
k__Bacteria_p__Cyanobacteria_c__Nostocophycideae_o__Nostocales_f__Nostocaceae_g___s__	0	0	29	0	13	0	80	0	15	22	25	19		520	0	nd	nd	nd	0	0	0	17	25	236	689
k__Bacteria_p__Cyanobacteria_c__Nostocophycideae_o__Nostocales_f__Nostocaceae_g__Nostoc_s__	0	0	0	0	0	0	0	23	0	0	0	0		0	0	nd	nd	nd	0	113	0	48	0	0	0
k__Bacteria_p__Cyanobacteria_c__Nostocophycideae_o__Nostocales_f__Nostocaceae_NA_NA	0	0	34	0	0	0	22	0	120	45	26	0		0	0	nd	nd	nd	0	0	0	0	0	0	0
k__Bacteria_p__Cyanobacteria_c__Nostocophycideae_o__Nostocales_f__Scytonemataceae_g___s__	0	0	0	0	0	0	24	0	0	0	0	0		0	0	nd	nd	nd	0	0	0	0	0	0	0
k__Bacteria_p__Cyanobacteria_c__Nostocophycideae_o__Nostocales_f__Scytonemataceae_g__Scytonema_s__	0	0	0	0	2	0	0	0	0	0	0	0		0	0	nd	nd	nd	0	0	0	0	0	0	0
k__Bacteria_p__Cyanobacteria_c__Nostocophycideae_o__Stigonematales_f__Rivulariaceae_g___s__	0	0	0	0	0	0	6	17	0	19	0	0		31	0	nd	nd	nd	0	0	12	66	19	35	0
k__Bacteria_p__Cyanobacteria_c__Nostocophycideae_o__Stigonematales_f__Rivulariaceae_g__Calothrix_s__	0	0	0	0	0	0	14	15	0	0	0	0		67	0	nd	nd	nd	5	0	19	52	63	108	16
k__Bacteria_p__Cyanobacteria_c__Oscillatoriophycideae_NA_NA_NA_NA	0	0	0	0	0	7	12	0	0	0	0	0		9	0	nd	nd	nd	0	8	0	104	16	129	0
k__Bacteria_p__Cyanobacteria_c__Oscillatoriophycideae_o__Chroococcales_f__Xenococcaceae_g___s__	0	0	0	6	0	6	52	134	0	24	7	9		338	4	nd	nd	nd	7	108	0	79	8	149	10
k__Bacteria_p__Cyanobacteria_c__Oscillatoriophycideae_o__Chroococcales_NA_NA_NA	0	0	0	0	11	0	3	0	0	0	0	0		2	0	nd	nd	nd	0	0	0	3	0	0	0
k__Bacteria_p__Cyanobacteria_c__Oscillatoriophycideae_o__Oscillatoriales_f___g___s__	0	0	0	0	0	0	0	0	0	0	0	0		0	0	nd	nd	nd	0	0	0	0	0	0	0
k__Bacteria_p__Cyanobacteria_c__Oscillatoriophycideae_o__Oscillatoriales_f__Phormidiaceae_g___s__	0	0	0	0	0	0	4	0	0	0	0	0		0	0	nd	nd	nd	0	0	0	0	0	0	0
k__Bacteria_p__Cyanobacteria_c__Oscillatoriophycideae_o__Oscillatoriales_f__Phormidiaceae_g__Phormidium_NA	0	0	43	0	0	10	0	0	0	0	6	0		0	0	nd	nd	nd	0	0	0	0	0	0	0
k__Bacteria_p__Cyanobacteria_c__Oscillatoriophycideae_o__Oscillatoriales_f__Phormidiaceae_g__Phormidium_s__	0	0	0	0	17	49	786	201	763	463	2426	36		129	0	nd	nd	nd	28	30	38	194	75	252	24
k__Bacteria_p__Cyanobacteria_c__Oscillatoriophycideae_o__Oscillatoriales_f__Phormidiaceae_NA_NA	0	0	0	0	0	0	28	0	0	3	0	4		0	0	nd	nd	nd	0	0	0	64	0	0	0
k__Bacteria_p__Cyanobacteria_c__Synechococcophycideae_o__Pseudanabaenales_f__Pseudanabaenaceae_g__Leptolyngbya_s__	0	0	0	0	0	0	0	0	5	0	6	0		16	0	nd	nd	nd	3	0	0	0	26	37	0
k__Bacteria_p__Cyanobacteria_c__Synechococcophycideae_o__Pseudanabaenales_f__Pseudanabaenaceae_g__Nodosilinea_s__nodulosa	0	0	0	0	0	0	13	0	0	0	0	0		0	0	nd	nd	nd	0	0	0	0	0	0	0
k__Bacteria_p__Cyanobacteria_c__Synechococcophycideae_o__Pseudanabaenales_f__Pseudanabaenaceae_g__Pseudanabaena_s__	0	0	0	0	2	25	214	0	78	32	38	6		13	2	nd	nd	nd	0	0	0	34	135	215	0
k__Bacteria_p__Cyanobacteria_c__Synechococcophycideae_o__Pseudanabaenales_f__Pseudanabaenaceae_NA_NA	0	0	0	0	0	0	34	0	0	0	0	0		0	0	nd	nd	nd	0	5	0	0	0	0	0
k__Bacteria_p__Cyanobacteria_c__Synechococcophycideae_o__Synechococcales_f___g___s__	0	0	0	0	0	0	0	0	0	7	0	0		0	0	nd	nd	nd	0	0	0	0	0	0	0
k__Bacteria_p__Cyanobacteria_c__Synechococcophycideae_o__Synechococcales_f__Acaryochloridaceae_g__Acaryochloris_s__	0	0	0	0	0	0	0	181	0	0	0	0		696	5	nd	nd	nd	153	7650	25	53	2	6	0
k__Bacteria_p__Cyanobacteria_NA_NA_NA_NA_NA	56	0	0	0	0	14	2	42	78	26	4	0		2	0	nd	nd	nd	7	0	52	8	6	18	0
k__Bacteria_p__Deferribacteres_c__Deferribacteres_o__Deferribacterales_f__Deferribacteraceae_g__Mucispirillum_s__	0	0	0	0	0	0	19	0	7	0	0	0		0	0	nd	nd	nd	0	0	0	0	0	0	0
k__Bacteria_p__Elusimicrobia_c___o___f___g___s__	0	0	0	0	0	8	0	0	0	19	0	0		0	0	nd	nd	nd	0	0	0	0	0	0	0
k__Bacteria_p__Elusimicrobia_c__Elusimicrobia_NA_NA_NA_NA	0	0	0	0	8	17	43	19	9	16	6	0		22	3	nd	nd	nd	0	0	0	0	0	8	0
k__Bacteria_p__Elusimicrobia_c__Elusimicrobia_o__Elusimicrobiales_f___g___s__	0	18	152	0	35	55	119	0	25	40	7	2		0	7	nd	nd	nd	0	55	0	19	6	18	0
k__Bacteria_p__Elusimicrobia_c__Elusimicrobia_o__Elusimicrobiales_f__Elusimicrobiaceae_g___s__	0	0	0	0	0	0	0	0	5	3	0	0		0	0	nd	nd	nd	0	0	0	0	0	0	0
k__Bacteria_p__Elusimicrobia_c__Elusimicrobia_o__Elusimicrobiales_f__Elusimicrobiaceae_g__Elusimicrobium_s__minutum	0	0	0	0	0	0	25	0	0	0	0	0		0	0	nd	nd	nd	0	0	0	0	0	0	0
k__Bacteria_p__Elusimicrobia_c__Elusimicrobia_o__FAC88_f___g___s__	0	62	0	3	224	12	53	0	124	193	13	0		109	0	nd	nd	nd	0	0	0	120	44	242	7
k__Bacteria_p__Elusimicrobia_c__Elusimicrobia_o__IIb_f___g___s__	10	0	19	0	118	14	76	0	22	123	4	14		56	51	nd	nd	nd	18	29	0	31	25	245	94
k__Bacteria_p__Elusimicrobia_c__Elusimicrobia_o__MD2894B20_f___g___s__	0	0	0	0	0	18	0	0	0	0	0	0		0	0	nd	nd	nd	0	0	0	0	0	0	0
k__Bacteria_p__Elusimicrobia_c__Elusimicrobia_o__MVP88_f___g___s__	17	27	0	0	6	0	28	0	53	24	0	0		0	0	nd	nd	nd	0	0	0	0	0	0	0
k__Bacteria_p__Elusimicrobia_c__Endomicrobia_o___f___g___s__	0	31	11	10	73	25	41	0	55	74	0	9		8	0	nd	nd	nd	0	247	0	39	0	35	14
k__Bacteria_p__Elusimicrobia_c__OP2_o___f___g___s__	0	0	0	0	0	13	0	0	0	0	0	0		0	0	nd	nd	nd	0	0	0	0	0	0	0
k__Bacteria_p__Elusimicrobia_NA_NA_NA_NA_NA	0	6	0	0	0	0	0	0	0	0	0	10		0	0	nd	nd	nd	0	0	0	0	5	0	0
k__Bacteria_p__FBP_c___o___f___g___s__	0	0	162	106	8	15	12	18	0	2	5	2		21	0	nd	nd	nd	17	106	0	16	0	85	0
k__Bacteria_p__FCPU426_c___o___f___g___s__	0	0	0	0	22	0	76	0	97	5	16	0		0	0	nd	nd	nd	4	44	0	76	27	27	23
k__Bacteria_p__Fibrobacteres_c___o___f___g___s__	0	0	0	0	3	0	12	0	23	0	39	28		0	0	nd	nd	nd	0	0	0	0	0	0	0
k__Bacteria_p__Fibrobacteres_c__Fibrobacteria_o__258ds10_f___g___s__	0	11	31	0	51	129	91	10	247	166	28	42		99	26	nd	nd	nd	11	151	14	19	71	157	88
k__Bacteria_p__Fibrobacteres_c__Fibrobacteria_o__Fibrobacterales_f___g___s__	0	2	0	0	0	0	0	0	0	0	0	0		0	0	nd	nd	nd	0	0	0	0	0	0	0
k__Bacteria_p__Fibrobacteres_c__Fibrobacteria_o__Ucp1540_f___g___s__	0	0	0	0	0	0	6	0	0	0	0	0		13	0	nd	nd	nd	0	0	0	0	0	0	0
k__Bacteria_p__Fibrobacteres_c__SBZC_2415_o___f___g___s__	0	0	0	0	4	0	7	0	4	0	0	0		0	0	nd	nd	nd	0	0	0	0	0	0	0
k__Bacteria_p__Fibrobacteres_c__TG3_o___f___g___s__	0	0	0	0	0	0	0	0	0	0	0	0		0	0	nd	nd	nd	0	0	0	0	0	0	0
k__Bacteria_p__Fibrobacteres_c__TG3_o__TG31_f___g___s__	0	7	0	0	0	0	7	0	8	29	0	0		0	0	nd	nd	nd	0	0	0	0	0	0	0
k__Bacteria_p__Fibrobacteres_c__TG3_o__TG31_f__B122_g___s__	0	4	0	0	0	0	0	0	0	0	0	0		0	0	nd	nd	nd	0	0	0	0	0	0	0
k__Bacteria_p__Fibrobacteres_c__TG3_o__TG32_f___g___s__	0	0	0	0	2	3	0	0	5	5	0	0		0	0	nd	nd	nd	0	0	0	0	0	0	0
k__Bacteria_p__Fibrobacteres_NA_NA_NA_NA_NA	0	0	0	0	0	5	0	0	0	0	0	0		0	0	nd	nd	nd	0	0	0	0	0	0	0
k__Bacteria_p__Firmicutes_c__AHT28_o___f___g___s__	0	0	0	0	0	4	0	0	0	0	0	0		0	0	nd	nd	nd	0	0	0	0	0	0	0
k__Bacteria_p__Firmicutes_c__Bacilli_NA_NA_NA_NA	0	0	0	0	0	0	0	0	0	0	0	0		0	0	nd	nd	nd	0	0	0	0	0	0	0
k__Bacteria_p__Firmicutes_c__Bacilli_o__Bacillales_f___g___s__	0	0	89	24	0	0	0	0	0	0	0	0		0	0	nd	nd	nd	0	0	0	0	0	0	0
k__Bacteria_p__Firmicutes_c__Bacilli_o__Bacillales_f__[Exiguobacteraceae]_g___s__	0	0	0	0	0	0	365	0	0	0	0	0		0	0	nd	nd	nd	100	32	0	11	0	0	0
k__Bacteria_p__Firmicutes_c__Bacilli_o__Bacillales_f__[Exiguobacteraceae]_g__Exiguobacterium_s__	0	71	23	0	0	0	0	0	0	0	0	33		0	0	nd	nd	nd	0	0	0	0	0	0	0
k__Bacteria_p__Firmicutes_c__Bacilli_o__Bacillales_f__Alicyclobacillaceae_g__Alicyclobacillus_s__	0	0	0	0	0	0	0	0	0	0	4	0		0	3	nd	nd	nd	0	0	0	0	0	0	0
k__Bacteria_p__Firmicutes_c__Bacilli_o__Bacillales_f__Bacillaceae_g__Bacillus_NA	0	0	0	0	0	0	0	0	0	0	14	15		0	0	nd	nd	nd	0	12	0	0	0	0	0
k__Bacteria_p__Firmicutes_c__Bacilli_o__Bacillales_f__Bacillaceae_g__Bacillus_s__	17	0	0	0	0	25	0	0	0	0	0	43		0	0	nd	nd	nd	0	0	0	31	0	0	0
k__Bacteria_p__Firmicutes_c__Bacilli_o__Bacillales_f__Bacillaceae_g__Bacillus_s__cereus	0	0	29	6	23	13	0	0	0	0	0	0		166	49	nd	nd	nd	101	34	0	0	0	0	0
k__Bacteria_p__Firmicutes_c__Bacilli_o__Bacillales_f__Bacillaceae_g__Bacillus_s__coagulans	0	0	0	0	0	0	0	0	0	32	0	0		0	0	nd	nd	nd	0	0	0	0	0	0	0
k__Bacteria_p__Firmicutes_c__Bacilli_o__Bacillales_f__Bacillaceae_g__Bacillus_s__halodurans	0	0	30	0	0	0	0	0	0	0	0	0		63	0	nd	nd	nd	0	0	0	0	0	0	0
k__Bacteria_p__Firmicutes_c__Bacilli_o__Bacillales_f__Bacillaceae_g__Bacillus_s__humi	0	0	57	0	0	0	0	0	0	0	0	0		0	0	nd	nd	nd	0	0	0	0	0	0	0
k__Bacteria_p__Firmicutes_c__Bacilli_o__Bacillales_f__Bacillaceae_NA_NA	0	13	8	0	0	0	0	0	17	21	0	0		0	0	nd	nd	nd	0	0	0	0	0	0	0
k__Bacteria_p__Firmicutes_c__Bacilli_o__Bacillales_f__Paenibacillaceae_g__Ammoniphilus_s__	0	0	38	0	0	0	0	0	0	0	0	0		0	0	nd	nd	nd	0	0	0	0	0	0	0
k__Bacteria_p__Firmicutes_c__Bacilli_o__Bacillales_f__Paenibacillaceae_g__Aneurinibacillus_s__	0	0	0	0	0	0	0	24	0	0	0	0		0	0	nd	nd	nd	0	0	0	0	0	0	0
k__Bacteria_p__Firmicutes_c__Bacilli_o__Bacillales_f__Paenibacillaceae_g__Paenibacillus_s__	0	0	0	0	0	0	0	7	0	0	0	0		0	0	nd	nd	nd	0	0	0	0	0	0	0
k__Bacteria_p__Firmicutes_c__Bacilli_o__Bacillales_f__Planococcaceae_g__Planomicrobium_s__	0	0	0	0	0	0	76	0	17	0	0	0		0	0	nd	nd	nd	0	0	64	0	0	0	0
k__Bacteria_p__Firmicutes_c__Bacilli_o__Bacillales_f__Planococcaceae_g__Solibacillus_s__	0	9	0	0	0	0	11	0	0	0	0	0		8	0	nd	nd	nd	0	0	0	0	10	0	0
k__Bacteria_p__Firmicutes_c__Bacilli_o__Bacillales_f__Planococcaceae_g__Sporosarcina_s__	0	0	0	0	0	0	0	0	0	8	0	0		0	0	nd	nd	nd	0	0	0	0	0	0	0
k__Bacteria_p__Firmicutes_c__Bacilli_o__Bacillales_f__Planococcaceae_g__Sporosarcina_s__ginsengi	0	0	393	0	0	0	16	0	0	0	0	0		0	0	nd	nd	nd	0	0	0	0	0	0	0
k__Bacteria_p__Firmicutes_c__Bacilli_o__Bacillales_f__Planococcaceae_NA_NA	0	5	120	0	0	0	0	0	0	0	0	0		20	0	nd	nd	nd	0	15	0	0	0	0	0
k__Bacteria_p__Firmicutes_c__Bacilli_o__Bacillales_f__Staphylococcaceae_g__Jeotgalicoccus_s__	0	0	17	0	0	0	0	0	0	0	0	0		0	0	nd	nd	nd	0	0	0	0	0	0	0
k__Bacteria_p__Firmicutes_c__Bacilli_o__Bacillales_f__Staphylococcaceae_g__Staphylococcus_s__	0	0	118	5	0	0	34	0	0	0	0	0		0	0	nd	nd	nd	0	6	5	60	0	0	0
k__Bacteria_p__Firmicutes_c__Bacilli_o__Bacillales_f__Thermoactinomycetaceae_g___s__	0	0	0	0	0	0	0	0	0	0	3	0		0	0	nd	nd	nd	0	0	0	0	0	0	0
k__Bacteria_p__Firmicutes_c__Bacilli_o__Bacillales_NA_NA_NA	0	0	17	0	0	10	0	37	0	0	0	0		0	0	nd	nd	nd	0	0	0	0	6	90	0
k__Bacteria_p__Firmicutes_c__Bacilli_o__Lactobacillales_f__Aerococcaceae_g__Aerococcus_s__	0	0	0	0	0	0	20	0	0	0	0	0		0	0	nd	nd	nd	0	0	0	0	0	0	0
k__Bacteria_p__Firmicutes_c__Bacilli_o__Lactobacillales_f__Carnobacteriaceae_g___s__	0	0	73	0	0	0	0	0	0	0	0	0		0	0	nd	nd	nd	0	0	0	0	0	0	0
k__Bacteria_p__Firmicutes_c__Bacilli_o__Lactobacillales_f__Carnobacteriaceae_g__Carnobacterium_s__	0	0	0	0	0	0	0	0	79	0	0	0		35	0	nd	nd	nd	0	0	0	0	0	19	0
k__Bacteria_p__Firmicutes_c__Bacilli_o__Lactobacillales_f__Enterococcaceae_g__Enterococcus_s__	0	0	13	0	0	18	0	0	0	0	0	0		0	6	nd	nd	nd	0	0	0	0	0	0	0
k__Bacteria_p__Firmicutes_c__Bacilli_o__Lactobacillales_f__Enterococcaceae_g__Vagococcus_s__	0	0	0	0	0	0	0	0	18	0	0	0		75	0	nd	nd	nd	0	0	0	0	0	36	0
k__Bacteria_p__Firmicutes_c__Bacilli_o__Lactobacillales_f__Lactobacillaceae_g__Lactobacillus_s__	0	0	0	0	0	0	0	0	0	2	0	0		0	0	nd	nd	nd	0	0	0	0	0	0	0
k__Bacteria_p__Firmicutes_c__Bacilli_o__Lactobacillales_f__Lactobacillaceae_g__Lactobacillus_s__iners	0	0	15	0	0	0	0	0	0	0	0	0		0	0	nd	nd	nd	0	0	0	0	0	0	0
k__Bacteria_p__Firmicutes_c__Bacilli_o__Lactobacillales_f__Lactobacillaceae_g__Lactobacillus_s__reuteri	0	0	0	0	0	0	0	46	0	0	0	0		0	0	nd	nd	nd	0	0	0	0	0	0	0
k__Bacteria_p__Firmicutes_c__Bacilli_o__Lactobacillales_f__Leuconostocaceae_g___s__	0	0	0	0	0	0	0	0	0	24	0	0		0	0	nd	nd	nd	0	0	0	0	0	0	0
k__Bacteria_p__Firmicutes_c__Bacilli_o__Lactobacillales_f__Leuconostocaceae_g__Leuconostoc_s__	0	0	0	0	0	0	0	0	15	0	0	0		0	0	nd	nd	nd	0	0	0	0	0	0	0
k__Bacteria_p__Firmicutes_c__Bacilli_o__Lactobacillales_f__Leuconostocaceae_g__Leuconostoc_s__mesenteroides	0	0	0	0	0	4	0	0	0	0	0	0		0	0	nd	nd	nd	0	0	0	0	0	0	0
k__Bacteria_p__Firmicutes_c__Bacilli_o__Lactobacillales_f__Leuconostocaceae_g__Weissella_s__	0	0	0	0	4	0	0	0	0	0	0	0		0	0	nd	nd	nd	0	0	0	0	0	0	0
k__Bacteria_p__Firmicutes_c__Bacilli_o__Lactobacillales_f__Streptococcaceae_g__Lactococcus_s__garvieae	0	0	0	0	2	0	0	0	0	0	0	0		0	0	nd	nd	nd	0	0	0	0	0	0	0
k__Bacteria_p__Firmicutes_c__Bacilli_o__Turicibacterales_f__Turicibacteraceae_g__Turicibacter_s__	0	0	0	0	0	0	0	0	5	0	0	0		0	0	nd	nd	nd	0	0	0	0	0	0	0
k__Bacteria_p__Firmicutes_c__Clostridia_NA_NA_NA_NA	0	0	0	0	22	4	0	0	3	0	3	0		0	0	nd	nd	nd	0	0	0	0	0	0	0
k__Bacteria_p__Firmicutes_c__Clostridia_o__Clostridiales_f___g___s__	0	29	562	0	0	72	60	0	213	75	0	0		3	0	nd	nd	nd	0	8	0	5	5	13	10
k__Bacteria_p__Firmicutes_c__Clostridia_o__Clostridiales_f__[Tissierellaceae]_g__WAL_1855D_s__	0	0	43	0	0	0	0	0	0	0	0	0		0	0	nd	nd	nd	0	0	0	0	0	0	0
k__Bacteria_p__Firmicutes_c__Clostridia_o__Clostridiales_f__Christensenellaceae_g___s__	0	0	0	0	18	27	3	0	7	0	9	6		19	0	nd	nd	nd	0	0	0	0	3	0	0
k__Bacteria_p__Firmicutes_c__Clostridia_o__Clostridiales_f__Christensenellaceae_g__Christensenella_s__	0	0	0	0	0	0	0	0	0	22	0	0		0	0	nd	nd	nd	0	0	0	0	0	0	0
k__Bacteria_p__Firmicutes_c__Clostridia_o__Clostridiales_f__Clostridiaceae_g___s__	0	0	0	0	10	0	0	0	42	0	0	0		0	18	nd	nd	nd	0	0	0	0	0	0	0
k__Bacteria_p__Firmicutes_c__Clostridia_o__Clostridiales_f__Clostridiaceae_g__Caloramator_s__	0	0	0	4	13	9	4	0	0	6	0	23		0	0	nd	nd	nd	0	0	0	0	0	0	0
k__Bacteria_p__Firmicutes_c__Clostridia_o__Clostridiales_f__Clostridiaceae_g__Clostridium_NA	0	7	0	0	0	0	42	0	79	13	0	0		4	116	nd	nd	nd	0	0	0	0	0	8	0
k__Bacteria_p__Firmicutes_c__Clostridia_o__Clostridiales_f__Clostridiaceae_g__Clostridium_s__	0	16	20	0	35	37	69	0	79	54	67	98		0	5	nd	nd	nd	4	0	0	12	5	0	0
k__Bacteria_p__Firmicutes_c__Clostridia_o__Clostridiales_f__Clostridiaceae_g__Clostridium_s__bowmanii	0	0	21	0	0	17	173	0	0	97	0	56		10	19	nd	nd	nd	0	0	0	5	0	0	0
k__Bacteria_p__Firmicutes_c__Clostridia_o__Clostridiales_f__Clostridiaceae_g__Clostridium_s__butyricum	0	17	52	0	15	0	108	0	14	37	15	20		0	17	nd	nd	nd	5	3	0	6	4	0	0
k__Bacteria_p__Firmicutes_c__Clostridia_o__Clostridiales_f__Clostridiaceae_g__Clostridium_s__celatum	0	0	0	0	0	0	0	0	0	28	0	0		0	0	nd	nd	nd	0	0	0	0	0	0	0
k__Bacteria_p__Firmicutes_c__Clostridia_o__Clostridiales_f__Clostridiaceae_g__Clostridium_s__cellulovorans	0	0	0	0	0	0	0	27	0	0	0	0		0	0	nd	nd	nd	0	0	0	0	0	0	0
k__Bacteria_p__Firmicutes_c__Clostridia_o__Clostridiales_f__Clostridiaceae_g__Clostridium_s__gasigenes	0	0	0	0	0	0	0	0	24	0	0	0		0	0	nd	nd	nd	0	0	0	0	0	0	0
k__Bacteria_p__Firmicutes_c__Clostridia_o__Clostridiales_f__Clostridiaceae_g__Clostridium_s__intestinale	0	0	11	0	0	0	6	0	0	0	0	0		3	0	nd	nd	nd	0	11	0	0	0	0	0
k__Bacteria_p__Firmicutes_c__Clostridia_o__Clostridiales_f__Clostridiaceae_g__Clostridium_s__pasteurianum	0	0	5	0	0	0	0	0	0	0	0	0		0	0	nd	nd	nd	0	0	0	0	0	0	0
k__Bacteria_p__Firmicutes_c__Clostridia_o__Clostridiales_f__Clostridiaceae_g__Clostridium_s__perfringens	0	0	124	0	0	16	0	0	6	0	0	0		0	0	nd	nd	nd	6	0	0	0	0	0	0
k__Bacteria_p__Firmicutes_c__Clostridia_o__Clostridiales_f__Clostridiaceae_g__Proteiniclasticum_s__	0	0	17	0	0	0	0	0	0	0	0	0		0	0	nd	nd	nd	0	0	0	0	0	0	0
k__Bacteria_p__Firmicutes_c__Clostridia_o__Clostridiales_f__Clostridiaceae_g__Thermoanaerobacterium_s__saccharolyticum	103	46	127	0	14	3	17	360	22	43	0	0		106	184	nd	nd	nd	0	135	230	27	0	30	0
k__Bacteria_p__Firmicutes_c__Clostridia_o__Clostridiales_f__Clostridiaceae_NA_NA	0	0	60	12	7	0	0	0	0	0	0	0		12	0	nd	nd	nd	0	0	0	0	0	0	0
k__Bacteria_p__Firmicutes_c__Clostridia_o__Clostridiales_f__Dehalobacteriaceae_g__Dehalobacterium_s__	0	0	0	0	0	0	0	0	0	9	0	0		0	0	nd	nd	nd	0	0	0	0	0	0	0
k__Bacteria_p__Firmicutes_c__Clostridia_o__Clostridiales_f__Eubacteriaceae_g__Pseudoramibacter_Eubacterium_s__	0	0	0	0	0	0	0	0	9	0	0	0		0	0	nd	nd	nd	0	0	0	0	0	0	0
k__Bacteria_p__Firmicutes_c__Clostridia_o__Clostridiales_f__Gracilibacteraceae_g___s__	0	0	0	0	0	0	0	0	0	29	0	0		0	0	nd	nd	nd	3	0	0	0	0	4	0
k__Bacteria_p__Firmicutes_c__Clostridia_o__Clostridiales_f__Lachnospiraceae_g___s__	0	0	200	0	0	35	70	0	0	46	22	26		0	0	nd	nd	nd	0	0	0	0	0	0	57
k__Bacteria_p__Firmicutes_c__Clostridia_o__Clostridiales_f__Lachnospiraceae_g__[Ruminococcus]_s__	0	7	0	0	0	0	0	0	0	0	0	0		0	0	nd	nd	nd	0	0	0	0	0	0	0
k__Bacteria_p__Firmicutes_c__Clostridia_o__Clostridiales_f__Lachnospiraceae_g__Anaerostipes_s__	0	0	0	0	0	0	22	0	0	0	0	0		0	0	nd	nd	nd	0	0	0	0	0	0	0
k__Bacteria_p__Firmicutes_c__Clostridia_o__Clostridiales_f__Lachnospiraceae_g__Blautia_NA	0	0	0	0	0	0	0	0	20	0	0	0		0	0	nd	nd	nd	0	0	0	0	0	0	0
k__Bacteria_p__Firmicutes_c__Clostridia_o__Clostridiales_f__Lachnospiraceae_g__Blautia_s__	0	0	0	0	0	0	34	0	79	0	0	0		0	0	nd	nd	nd	0	0	0	0	0	0	0
k__Bacteria_p__Firmicutes_c__Clostridia_o__Clostridiales_f__Lachnospiraceae_g__Blautia_s__producta	0	0	0	0	0	0	0	0	0	0	0	0		0	0	nd	nd	nd	0	0	0	0	0	0	0
k__Bacteria_p__Firmicutes_c__Clostridia_o__Clostridiales_f__Lachnospiraceae_g__Catonella_s__	0	0	15	0	0	0	0	0	0	0	0	0		0	0	nd	nd	nd	0	0	0	0	0	0	0
k__Bacteria_p__Firmicutes_c__Clostridia_o__Clostridiales_f__Lachnospiraceae_g__Clostridium_NA	0	0	0	0	0	5	32	0	20	10	13	0		0	0	nd	nd	nd	0	0	0	4	8	0	11
k__Bacteria_p__Firmicutes_c__Clostridia_o__Clostridiales_f__Lachnospiraceae_g__Clostridium_s__colinum	0	0	22	20	0	0	33	42	29	22	8	6		0	0	nd	nd	nd	0	0	0	0	14	31	0
k__Bacteria_p__Firmicutes_c__Clostridia_o__Clostridiales_f__Lachnospiraceae_g__Clostridium_s__fimetarium	0	0	0	0	0	0	20	0	0	21	0	0		0	0	nd	nd	nd	8	0	0	0	0	0	0
k__Bacteria_p__Firmicutes_c__Clostridia_o__Clostridiales_f__Lachnospiraceae_g__Clostridium_s__piliforme	0	0	0	2	0	0	0	0	0	0	6	0		38	0	nd	nd	nd	0	9	0	12	0	36	0
k__Bacteria_p__Firmicutes_c__Clostridia_o__Clostridiales_f__Lachnospiraceae_g__Coprococcus_s__	0	0	27	0	0	0	70	0	46	5	0	0		37	0	nd	nd	nd	0	0	0	10	0	24	4
k__Bacteria_p__Firmicutes_c__Clostridia_o__Clostridiales_f__Lachnospiraceae_g__Coprococcus_s__eutactus	0	0	0	0	0	0	0	0	77	5	6	0		0	0	nd	nd	nd	0	0	0	0	0	0	0
k__Bacteria_p__Firmicutes_c__Clostridia_o__Clostridiales_f__Lachnospiraceae_g__Epulopiscium_s__	0	0	17	0	0	0	12	0	9	0	17	0		0	0	nd	nd	nd	0	0	0	0	0	0	0
k__Bacteria_p__Firmicutes_c__Clostridia_o__Clostridiales_f__Lachnospiraceae_g__Lachnospira_s__	0	0	0	0	0	0	32	0	0	45	0	0		0	0	nd	nd	nd	0	0	0	0	0	0	0
k__Bacteria_p__Firmicutes_c__Clostridia_o__Clostridiales_f__Lachnospiraceae_g__Roseburia_s__	0	0	0	0	38	0	0	0	103	21	16	0		0	0	nd	nd	nd	0	0	0	0	0	0	0
k__Bacteria_p__Firmicutes_c__Clostridia_o__Clostridiales_f__Lachnospiraceae_NA_NA	0	28	156	18	0	40	163	0	110	85	0	6		13	0	nd	nd	nd	9	136	31	12	48	72	49
k__Bacteria_p__Firmicutes_c__Clostridia_o__Clostridiales_f__Peptococcaceae_g___s__	0	0	11	0	5	16	11	4	0	0	0	0		0	0	nd	nd	nd	0	0	0	0	0	0	0
k__Bacteria_p__Firmicutes_c__Clostridia_o__Clostridiales_f__Peptococcaceae_g__Desulfosporosinus_s__meridiei	0	0	0	0	0	5	17	0	0	11	0	0		0	4	nd	nd	nd	0	7	0	0	3	0	0
k__Bacteria_p__Firmicutes_c__Clostridia_o__Clostridiales_f__Peptococcaceae_g__WCHB184_s__	0	0	0	0	0	0	0	18	0	10	0	0		0	0	nd	nd	nd	0	0	0	0	0	0	0
k__Bacteria_p__Firmicutes_c__Clostridia_o__Clostridiales_f__Ruminococcaceae_g___s__	0	0	0	10	15	26	24	0	147	57	5	0		12	0	nd	nd	nd	0	16	0	0	6	7	5
k__Bacteria_p__Firmicutes_c__Clostridia_o__Clostridiales_f__Ruminococcaceae_g__Anaerotruncus_s__	0	0	0	0	0	0	0	0	0	15	0	0		0	0	nd	nd	nd	0	0	0	0	0	0	0
k__Bacteria_p__Firmicutes_c__Clostridia_o__Clostridiales_f__Ruminococcaceae_g__Clostridium_NA	0	0	12	0	18	10	11	0	23	19	0	0		59	0	nd	nd	nd	0	18	0	9	0	0	0
k__Bacteria_p__Firmicutes_c__Clostridia_o__Clostridiales_f__Ruminococcaceae_g__Clostridium_s__hungatei	28	0	2	0	0	0	0	0	31	9	0	0		0	0	nd	nd	nd	0	0	0	9	0	0	0
k__Bacteria_p__Firmicutes_c__Clostridia_o__Clostridiales_f__Ruminococcaceae_g__Faecalibacterium_s__prausnitzii	0	0	0	0	0	0	0	0	9	0	0	0		0	0	nd	nd	nd	0	0	31	0	0	0	0
k__Bacteria_p__Firmicutes_c__Clostridia_o__Clostridiales_f__Ruminococcaceae_g__Oscillospira_s__	0	0	0	0	5	0	16	0	62	25	0	0		0	0	nd	nd	nd	0	17	0	0	0	4	13
k__Bacteria_p__Firmicutes_c__Clostridia_o__Clostridiales_f__Ruminococcaceae_g__Ruminococcus_NA	0	0	0	0	0	0	3	0	29	9	0	5		0	0	nd	nd	nd	0	0	0	0	0	0	0
k__Bacteria_p__Firmicutes_c__Clostridia_o__Clostridiales_f__Ruminococcaceae_g__Ruminococcus_s__	0	0	0	4	8	0	56	0	124	58	8	18		54	0	nd	nd	nd	0	0	0	0	3	6	0
k__Bacteria_p__Firmicutes_c__Clostridia_o__Clostridiales_f__Ruminococcaceae_g__Ruminococcus_s__albus	0	0	0	0	0	0	0	0	0	0	8	0		0	0	nd	nd	nd	0	0	0	0	0	0	0
k__Bacteria_p__Firmicutes_c__Clostridia_o__Clostridiales_f__Ruminococcaceae_g__Ruminococcus_s__callidus	0	0	0	0	0	0	7	0	0	9	0	0		0	0	nd	nd	nd	0	0	0	0	0	0	0
k__Bacteria_p__Firmicutes_c__Clostridia_o__Clostridiales_f__Ruminococcaceae_g__Ruminococcus_s__flavefaciens	0	0	0	0	0	0	0	0	35	29	0	0		0	0	nd	nd	nd	0	0	0	0	0	0	0
k__Bacteria_p__Firmicutes_c__Clostridia_o__Clostridiales_f__Ruminococcaceae_NA_NA	0	13	0	5	14	15	62	16	43	33	10	41		36	9	nd	nd	nd	11	12	0	142	13	8	0
k__Bacteria_p__Firmicutes_c__Clostridia_o__Clostridiales_f__Syntrophomonadaceae_g__Syntrophomonas_s__	0	2	0	0	0	0	0	0	0	0	0	0		0	0	nd	nd	nd	0	0	0	0	0	0	0
k__Bacteria_p__Firmicutes_c__Clostridia_o__Clostridiales_f__Veillonellaceae_g___s__	0	13	0	0	2	6	24	0	5	0	0	0		0	0	nd	nd	nd	0	0	0	10	0	0	0
k__Bacteria_p__Firmicutes_c__Clostridia_o__Clostridiales_f__Veillonellaceae_g__Pelosinus_s__	0	0	0	0	0	0	87	0	25	4	0	0		0	0	nd	nd	nd	0	5	0	0	0	3	0
k__Bacteria_p__Firmicutes_c__Clostridia_o__Clostridiales_f__Veillonellaceae_g__Propionispira_s__arboris	0	0	0	0	0	0	0	0	54	0	0	0		0	0	nd	nd	nd	0	0	0	0	0	0	0
k__Bacteria_p__Firmicutes_c__Clostridia_o__Clostridiales_f__Veillonellaceae_g__Sporomusa_s__	0	0	0	0	0	0	0	0	4	0	0	0		0	3	nd	nd	nd	0	4	0	4	4	0	0
k__Bacteria_p__Firmicutes_c__Clostridia_o__Clostridiales_f__Veillonellaceae_g__Veillonella_s__dispar	0	0	3	0	0	0	0	0	0	0	0	0		0	0	nd	nd	nd	0	0	0	0	0	0	0
k__Bacteria_p__Firmicutes_c__Clostridia_o__Clostridiales_f__Veillonellaceae_NA_NA	0	0	0	0	0	0	0	0	27	0	12	0		0	0	nd	nd	nd	0	0	0	0	0	0	0
k__Bacteria_p__Firmicutes_c__Clostridia_o__Clostridiales_NA_NA_NA	0	19	97	0	21	50	174	55	176	91	13	58		47	0	nd	nd	nd	0	0	0	0	6	45	2
k__Bacteria_p__Firmicutes_c__Clostridia_o__Natranaerobiales_f__Anaerobrancaceae_g__Dethiobacter_s__	0	0	0	0	0	0	0	0	0	37	0	0		0	0	nd	nd	nd	0	0	0	0	0	0	0
k__Bacteria_p__Firmicutes_c__Clostridia_o__Natranaerobiales_f__ML1228J1_g___s__	0	0	0	0	0	0	0	0	0	36	0	0		0	0	nd	nd	nd	0	0	0	0	0	0	0
k__Bacteria_p__Firmicutes_c__Clostridia_o__OPB54_f___g___s__	0	0	0	0	0	6	0	71	0	8	0	0		0	4	nd	nd	nd	0	85	0	0	7	0	0
k__Bacteria_p__Firmicutes_c__Clostridia_o__Thermoanaerobacterales_f___g___s__	0	0	0	0	0	0	0	0	0	24	4	0		0	0	nd	nd	nd	0	0	0	0	0	0	0
k__Bacteria_p__Firmicutes_c__Clostridia_o__Thermoanaerobacterales_f__Caldicellulosiruptoraceae_g__Caldicellulosiruptor_s__saccharolyticus	40	8	30	13	9	8	0	120	18	0	0	0		14	0	nd	nd	nd	0	5	116	32	0	0	0
k__Bacteria_p__Firmicutes_c__Clostridia_o__Thermoanaerobacterales_f__Carboxydocellaceae_g__Carboxydocella_s__	0	0	0	0	0	0	0	0	64	0	0	0		0	38	nd	nd	nd	0	0	0	0	0	0	0
k__Bacteria_p__Firmicutes_c__Clostridia_o__Thermoanaerobacterales_f__Thermoanaerobacteraceae_g__Moorella_s__	0	5	60	0	13	0	11	60	5	0	0	0		18	3	nd	nd	nd	0	76	34	10	0	43	0
k__Bacteria_p__Firmicutes_c__Clostridia_o__Thermoanaerobacterales_f__Thermoanaerobacteraceae_g__Thermoanaerobacter_s__	32	0	9	0	0	0	0	325	0	0	0	0		6	0	nd	nd	nd	0	0	6	0	0	4	0
k__Bacteria_p__Firmicutes_NA_NA_NA_NA_NA	0	10	64	0	69	510	228	0	106	54	4	2		14	0	nd	nd	nd	19	29	0	10	0	0	0
k__Bacteria_p__Fusobacteria_c__Fusobacteriia_o__Fusobacteriales_f___g___s__	0	0	0	0	2	0	11	0	18	25	24	3		0	0	nd	nd	nd	0	0	0	0	0	0	0
k__Bacteria_p__GAL15_c___o___f___g___s__	0	0	0	0	0	0	0	0	0	24	0	0		0	0	nd	nd	nd	0	0	0	0	0	0	0
k__Bacteria_p__Gemmatimonadetes_c___o___f___g___s__	0	0	0	0	5	7	0	0	0	0	0	0		0	0	nd	nd	nd	0	0	0	3	0	0	0
k__Bacteria_p__Gemmatimonadetes_c__Gemm1_o___f___g___s__	0	8	0	8	132	31	57	0	145	226	13	0		112	0	nd	nd	nd	0	0	0	0	0	0	0
k__Bacteria_p__Gemmatimonadetes_c__Gemm2_o___f___g___s__	6	0	0	0	9	0	0	0	0	40	0	5		0	0	nd	nd	nd	0	0	0	0	0	0	0
k__Bacteria_p__Gemmatimonadetes_c__Gemm3_o___f___g___s__	0	0	0	0	0	0	0	0	27	11	0	0		0	0	nd	nd	nd	0	0	0	0	0	0	0
k__Bacteria_p__Gemmatimonadetes_c__Gemm5_o___f___g___s__	0	0	0	0	0	0	0	0	0	0	6	0		7	0	nd	nd	nd	0	0	0	0	0	0	0
k__Bacteria_p__Gemmatimonadetes_c__Gemmatimonadetes_NA_NA_NA_NA	0	0	0	0	0	0	0	0	0	0	7	0		0	0	nd	nd	nd	0	0	0	26	0	0	0
k__Bacteria_p__Gemmatimonadetes_c__Gemmatimonadetes_o___f___g___s__	2	11	54	12	16	0	24	3	11	30	0	6		93	5	nd	nd	nd	11	29	19	29	18	55	74
k__Bacteria_p__Gemmatimonadetes_c__Gemmatimonadetes_o__C114_f___g___s__	0	0	0	0	0	0	5	0	0	12	0	0		16	0	nd	nd	nd	0	0	33	0	0	40	3
k__Bacteria_p__Gemmatimonadetes_c__Gemmatimonadetes_o__Ellin5290_f___g___s__	0	0	69	0	5	17	3	0	4	24	0	0		131	0	nd	nd	nd	4	65	0	14	3	27	0
k__Bacteria_p__Gemmatimonadetes_c__Gemmatimonadetes_o__Gemmatimonadales_f___g___s__	0	0	3	0	0	0	0	0	0	0	0	0		33	0	nd	nd	nd	0	0	0	4	0	0	0
k__Bacteria_p__Gemmatimonadetes_c__Gemmatimonadetes_o__Gemmatimonadales_f__A1B1_g___s__	0	9	0	0	8	0	0	0	0	0	21	0		39	0	nd	nd	nd	0	0	0	0	0	0	0
k__Bacteria_p__Gemmatimonadetes_c__Gemmatimonadetes_o__Gemmatimonadales_f__Ellin5301_g___s__	0	0	0	0	0	0	0	0	0	9	0	0		6	0	nd	nd	nd	0	0	0	0	0	0	0
k__Bacteria_p__Gemmatimonadetes_c__Gemmatimonadetes_o__Gemmatimonadales_f__Gemmatimonadaceae_g__Gemmatimonas_s__	0	30	0	0	0	0	13	0	0	0	22	68		101	0	nd	nd	nd	0	0	0	0	0	26	54
k__Bacteria_p__Gemmatimonadetes_c__Gemmatimonadetes_o__KD887_f___g___s__	0	19	0	14	18	27	0	16	16	80	12	0		25	0	nd	nd	nd	0	0	0	0	0	0	0
k__Bacteria_p__Gemmatimonadetes_NA_NA_NA_NA_NA	0	0	64	0	0	0	0	0	0	0	0	0		0	0	nd	nd	nd	0	0	0	0	8	0	0
k__Bacteria_p__GN02_c___o___f___g___s__	0	0	0	0	4	0	0	0	0	0	0	0		0	0	nd	nd	nd	0	0	0	0	0	0	0
k__Bacteria_p__GN02_c__3BR5F_o___f___g___s__	3	0	0	0	5	0	0	57	0	2	0	0		14	0	nd	nd	nd	0	0	0	0	0	0	0
k__Bacteria_p__GN02_c__BB34_o___f___g___s__	0	0	0	0	3	0	0	0	39	13	0	0		31	2	nd	nd	nd	0	0	0	0	0	0	0
k__Bacteria_p__GN02_c__BD15_o___f___g___s__	0	5	19	0	5	22	126	17	189	64	42	10		0	0	nd	nd	nd	0	0	0	0	0	0	0
k__Bacteria_p__GN02_c__GKS2174_o___f___g___s__	17	37	24	8	70	37	97	148	7	160	17	8		213	0	nd	nd	nd	0	0	0	0	0	0	0
k__Bacteria_p__GN02_c__GN07_o___f___g___s__	0	0	0	0	0	0	0	0	5	0	3	0		0	0	nd	nd	nd	0	0	0	0	3	0	0
k__Bacteria_p__GN02_NA_NA_NA_NA_NA	0	0	0	0	0	0	0	0	0	11	0	0		0	0	nd	nd	nd	0	0	0	0	0	0	0
k__Bacteria_p__GN04_c___o___f___g___s__	0	11	0	0	0	0	8	0	0	24	0	0		0	3	nd	nd	nd	0	0	0	22	16	34	20
k__Bacteria_p__GN04_c__GN15_o___f___g___s__	23	0	0	0	0	0	3	0	0	0	0	0		8	0	nd	nd	nd	0	0	0	0	5	61	3
k__Bacteria_p__GN04_c__MSB5A5_o___f___g___s__	0	0	0	0	0	0	17	0	0	0	0	0		0	0	nd	nd	nd	0	0	0	0	0	0	0
k__Bacteria_p__GN04_NA_NA_NA_NA_NA	0	0	0	7	0	0	0	0	0	13	0	0		0	0	nd	nd	nd	0	0	0	0	0	0	0
k__Bacteria_p__GOUTA4_c___o___f___g___s__	0	0	0	0	0	0	0	0	0	0	0	3		0	0	nd	nd	nd	0	0	0	0	0	0	3
k__Bacteria_p__LD1_c___o___f___g___s__	0	0	0	0	0	0	0	0	0	0	0	0		0	0	nd	nd	nd	0	0	0	0	0	0	0
k__Bacteria_p__Lentisphaerae_c__[Lentisphaeria]_NA_NA_NA_NA	0	0	0	0	9	0	0	0	0	0	0	0		0	0	nd	nd	nd	0	0	0	0	0	0	0
k__Bacteria_p__Lentisphaerae_c__[Lentisphaeria]_o__Lentisphaerales_f__Arctic95B10_g___s__	0	0	0	0	5	0	15	0	0	5	2	0		0	0	nd	nd	nd	0	0	0	0	0	0	0
k__Bacteria_p__Lentisphaerae_c__[Lentisphaeria]_o__Lentisphaerales_f__Lentisphaeraceae_g___s__	0	0	16	0	0	0	0	0	0	0	0	0		0	0	nd	nd	nd	0	0	0	0	0	0	0
k__Bacteria_p__Lentisphaerae_c__[Lentisphaeria]_o__Lentisphaerales_NA_NA_NA	0	6	0	0	0	0	0	0	0	0	3	0		0	0	nd	nd	nd	0	0	0	0	0	0	0
k__Bacteria_p__Lentisphaerae_c__[Lentisphaeria]_o__Victivallales_f__Victivallaceae_g___s__	0	3	0	0	12	36	19	0	15	19	8	14		0	0	nd	nd	nd	0	0	0	14	0	0	0
k__Bacteria_p__Lentisphaerae_c__[Lentisphaeria]_o__Z20_f___g___s__	0	0	0	0	5	13	0	0	0	0	0	2		0	0	nd	nd	nd	0	0	0	0	0	0	0
k__Bacteria_p__NC10_c__1224_o__JHWHS47_f___g___s__	0	0	0	0	3	0	0	0	0	32	0	0		0	0	nd	nd	nd	0	0	0	0	0	0	0
k__Bacteria_p__NC10_c__1224_o__Methylomirabiliales_f__Methylomirabiliaceae_g__CandidatusMethylomirabilis_s__	66	0	0	0	3	3	9	0	0	55	2	7		0	0	nd	nd	nd	0	0	0	0	0	0	0
k__Bacteria_p__NC10_c__1224_o__Methylomirabiliales_f__Methylomirabiliaceae_NA_NA	0	0	0	0	0	7	0	0	0	0	0	0		0	0	nd	nd	nd	0	0	0	0	0	0	0
k__Bacteria_p__NC10_c__1224_o__MIZ17_f___g___s__	0	0	0	0	0	0	6	0	0	0	0	0		0	0	nd	nd	nd	0	0	0	0	0	0	0
k__Bacteria_p__NC10_c__wb1A12_o___f___g___s__	0	0	6	0	0	0	0	0	0	0	0	0		0	0	nd	nd	nd	0	0	0	0	0	0	0
k__Bacteria_p__Nitrospirae_c__Nitrospira_o__Nitrospirales_f___g___s__	0	0	0	0	0	3	3	0	3	7	0	0		0	0	nd	nd	nd	0	6	0	16	15	31	0
k__Bacteria_p__Nitrospirae_c__Nitrospira_o__Nitrospirales_f__[Leptospirillaceae]_g___s__	0	0	0	0	14	0	0	0	0	0	0	0		0	0	nd	nd	nd	0	0	0	0	0	0	0
k__Bacteria_p__Nitrospirae_c__Nitrospira_o__Nitrospirales_f__[Thermodesulfovibrionaceae]_g__GOUTA19_s__	0	0	0	0	0	0	10	0	11	42	11	10		0	0	nd	nd	nd	0	0	0	0	0	0	0
k__Bacteria_p__Nitrospirae_c__Nitrospira_o__Nitrospirales_f__[Thermodesulfovibrionaceae]_g__LCP6_s__	0	0	0	0	0	0	0	0	65	25	0	0		0	0	nd	nd	nd	0	0	0	0	0	0	0
k__Bacteria_p__Nitrospirae_c__Nitrospira_o__Nitrospirales_f__03196A21_g___	0	0	0	0	4	0	0	0	0	0	0	0		0	0	nd	nd	nd	0	0	0	0	0	0	0
k__Bacteria_p__Nitrospirae_c__Nitrospira_o__Nitrospirales_f__03196A21_g___s__	43	0	14	0	52	20	81	0	118	364	27	30		124	0	nd	nd	nd	0	0	0	0	0	0	0
k__Bacteria_p__Nitrospirae_c__Nitrospira_o__Nitrospirales_f__FW_g__429_s__	0	0	0	0	0	11	0	0	0	4	0	0		0	0	nd	nd	nd	0	0	0	0	0	0	0
k__Bacteria_p__Nitrospirae_c__Nitrospira_o__Nitrospirales_f__Nitrospiraceae_g___s__	0	8	36	0	0	0	7	0	59	11	0	0		0	12	nd	nd	nd	0	0	0	0	0	18	0
k__Bacteria_p__Nitrospirae_c__Nitrospira_o__Nitrospirales_f__Nitrospiraceae_g__JG37AG70_s__	18	0	0	0	0	11	7	0	0	35	0	0		0	0	nd	nd	nd	0	0	0	0	0	0	0
k__Bacteria_p__Nitrospirae_c__Nitrospira_o__Nitrospirales_f__Nitrospiraceae_g__Nitrospira_s__	7	22	153	4	65	54	105	62	62	88	0	17		190	0	nd	nd	nd	9	36	25	89	170	119	229
k__Bacteria_p__NKB19_c___o___f___g___s__	0	0	61	0	0	0	2	0	0	0	0	0		0	0	nd	nd	nd	0	0	0	2	0	9	0
k__Bacteria_p__NKB19_c__TSBW08_o___f___g___s__	0	0	0	0	2	0	16	0	33	4	0	0		25	5	nd	nd	nd	0	0	0	0	7	0	4
k__Bacteria_p__OC31_c___o___f___g___s__	0	0	0	0	0	0	12	0	0	0	0	0		0	0	nd	nd	nd	0	0	0	0	0	0	0
k__Bacteria_p__OD1_c___o___f___g___s__	24	72	8	7	117	105	152	98	238	202	5	4		270	92	nd	nd	nd	4	68	9	105	13	442	0
k__Bacteria_p__OD1_c__ABY1_o___f___g___s__	119	93	41	6	137	81	224	3	370	183	17	0		306	228	nd	nd	nd	10	326	6	126	65	230	22
k__Bacteria_p__OD1_c__MbNB09_o___f___g___s__	65	107	18	0	110	35	150	75	114	173	0	9		81	0	nd	nd	nd	0	0	0	0	0	0	0
k__Bacteria_p__OD1_c__SM2F11_o___f___g___s__	10	106	89	3	118	66	98	192	96	62	0	0		126	193	nd	nd	nd	3	215	36	88	28	299	0
k__Bacteria_p__OD1_c__ZB2_o___f___g___s__	82	440	312	56	504	529	828	574	840	797	103	119		1112	654	nd	nd	nd	7	459	20	388	218	1067	62
k__Bacteria_p__OD1_NA_NA_NA_NA_NA	31	60	14	0	79	15	107	25	42	125	2	24		147	28	nd	nd	nd	3	99	0	42	28	82	25
k__Bacteria_p__OP1_c__[Acetothermia]_o__[Acetothermales]_f___g___s__	0	0	0	0	0	0	0	81	0	0	0	0		0	0	nd	nd	nd	0	0	0	0	0	0	0
k__Bacteria_p__OP11_c___o___f___g___s__	0	0	4	0	2	0	0	0	0	29	0	0		5	10	nd	nd	nd	0	0	0	0	0	4	0
k__Bacteria_p__OP11_c__OP112_o___f___g___s__	0	0	0	0	0	0	11	0	0	0	0	0		0	0	nd	nd	nd	0	0	0	0	0	0	0
k__Bacteria_p__OP11_c__OP112_o__KD3145_f___g___s__	0	0	0	0	0	0	0	0	0	3	0	0		0	0	nd	nd	nd	0	0	0	0	0	0	0
k__Bacteria_p__OP11_c__OP113_o___f___g___s__	0	4	0	0	5	26	27	0	0	21	0	0		12	0	nd	nd	nd	0	0	0	0	0	0	0
k__Bacteria_p__OP11_c__OP114_o___f___g___s__	0	0	0	0	0	12	0	0	0	0	3	0		0	0	nd	nd	nd	0	0	0	0	0	0	0
k__Bacteria_p__OP11_c__WCHB164_o___f___g___s__	0	0	0	0	0	0	2	0	0	8	0	0		0	0	nd	nd	nd	0	0	0	0	0	0	0
k__Bacteria_p__OP11_c__WCHB164_o__d153_f___g___s__	0	0	6	0	0	0	13	0	0	0	0	0		0	0	nd	nd	nd	0	0	0	0	0	0	0
k__Bacteria_p__OP11_NA_NA_NA_NA_NA	11	0	0	0	2	0	0	0	0	7	0	0		0	11	nd	nd	nd	0	0	0	9	0	0	0
k__Bacteria_p__OP3_c___o___f___g___s__	0	0	0	0	0	11	5	0	0	0	0	0		0	0	nd	nd	nd	0	0	0	0	0	0	0
k__Bacteria_p__OP3_c__BD49_o___f___g___s__	0	54	0	0	42	34	48	28	201	22	7	25		0	0	nd	nd	nd	0	0	0	0	0	0	0
k__Bacteria_p__OP3_c__koll11_NA_NA_NA_NA	0	0	25	0	2	0	0	0	0	0	0	0		0	0	nd	nd	nd	0	0	0	0	0	0	0
k__Bacteria_p__OP3_c__koll11_o___f___g___s__	196	218	444	14	326	150	644	31	527	281	48	21		224	412	nd	nd	nd	65	3051	0	161	388	590	410
k__Bacteria_p__OP3_c__koll11_o__GIF10_f___g___s__	0	33	0	5	38	16	106	0	212	41	0	2		0	0	nd	nd	nd	0	19	0	23	0	0	0
k__Bacteria_p__OP3_c__koll11_o__GIF10_f__kpj58rc_g___s__	0	14	37	0	8	8	17	22	30	29	0	0		9	11	nd	nd	nd	0	395	0	6	12	49	6
k__Bacteria_p__OP3_c__PBS25_o___f___g___s__	182	144	95	0	130	90	218	46	292	329	12	135		27	0	nd	nd	nd	0	0	0	0	0	0	0
k__Bacteria_p__OP3_NA_NA_NA_NA_NA	25	7	0	0	8	6	43	0	6	4	0	0		0	5	nd	nd	nd	0	0	0	0	19	0	0
k__Bacteria_p__OP8_c__OP8_1_o___f___g___s__	0	0	0	0	0	0	6	0	0	25	0	0		0	0	nd	nd	nd	0	0	0	0	0	0	0
k__Bacteria_p__OP8_c__OP8_1_o__SHA124_f___g___s__	0	0	0	0	0	0	0	0	0	8	6	0		0	0	nd	nd	nd	0	0	0	0	0	0	0
k__Bacteria_p__PAUC34f_c___o___f___g___s__	0	0	0	0	5	0	7	0	0	0	0	0		0	0	nd	nd	nd	0	0	0	0	0	0	2
k__Bacteria_p__Planctomycetes_c___o___f___g___s__	0	29	0	5	7	2	7	0	59	10	2	0		2	11	nd	nd	nd	5	12	0	42	3	81	30
k__Bacteria_p__Planctomycetes_c__[Brocadiae]_o__Brocadiales_f__Brocadiaceae_g___s__	0	0	0	0	0	0	6	0	0	0	0	0		0	0	nd	nd	nd	0	0	0	0	0	0	0
k__Bacteria_p__Planctomycetes_c__028H05PBNP5_o___f___g___s__	0	0	0	0	0	17	0	10	0	0	0	0		7	0	nd	nd	nd	0	0	0	0	0	0	0
k__Bacteria_p__Planctomycetes_c__BD711_o___f___g___s__	0	0	0	0	22	0	3	0	0	27	11	0		17	0	nd	nd	nd	0	0	0	0	0	0	0
k__Bacteria_p__Planctomycetes_c__C6_o__d113_f___g___s__	0	0	0	0	0	0	4	0	20	18	0	0		20	0	nd	nd	nd	0	0	0	0	4	3	0
k__Bacteria_p__Planctomycetes_c__C6_o__MVS107_f___g___s__	0	10	41	24	10	0	37	27	39	69	2	0		5	0	nd	nd	nd	0	0	0	0	0	0	0
k__Bacteria_p__Planctomycetes_c__ODP123_o__T8B82_f___g___s__	0	0	0	0	0	0	0	0	0	34	0	0		0	0	nd	nd	nd	0	0	0	0	0	0	0
k__Bacteria_p__Planctomycetes_c__OM190_o__agg27_f___g___s__	0	39	0	0	8	6	26	0	5	198	4	0		109	197	nd	nd	nd	0	75	43	76	106	291	162
k__Bacteria_p__Planctomycetes_c__OM190_o__CL50015_f___g___s__	96	54	118	12	69	21	34	51	107	100	23	15		256	0	nd	nd	nd	0	0	0	0	0	0	0
k__Bacteria_p__Planctomycetes_c__Phycisphaerae_NA_NA_NA_NA	0	0	0	0	0	0	0	0	0	14	0	0		12	0	nd	nd	nd	0	0	0	0	0	0	0
k__Bacteria_p__Planctomycetes_c__Phycisphaerae_o__AKAU3564_f___g___s__	0	0	0	0	4	0	0	0	0	68	4	0		0	0	nd	nd	nd	0	0	0	4	2	0	0
k__Bacteria_p__Planctomycetes_c__Phycisphaerae_o__C86_f___g___s__	0	0	0	0	0	0	3	0	0	0	0	0		3	0	nd	nd	nd	0	0	0	0	0	17	0
k__Bacteria_p__Planctomycetes_c__Phycisphaerae_o__CCM11a_f___g___s__	4	0	0	0	4	0	18	8	5	59	8	0		11	0	nd	nd	nd	0	14	0	39	21	134	32
k__Bacteria_p__Planctomycetes_c__Phycisphaerae_o__mle18_f___g___s__	0	0	0	0	3	0	0	28	0	23	0	4		0	0	nd	nd	nd	0	0	0	0	0	0	0
k__Bacteria_p__Planctomycetes_c__Phycisphaerae_o__MSBL9_f___g___s__	0	0	0	0	0	0	0	0	27	10	6	0		0	0	nd	nd	nd	0	0	0	0	0	0	0
k__Bacteria_p__Planctomycetes_c__Phycisphaerae_o__Phycisphaerales_f___g___s__	11	26	304	19	12	25	101	209	152	84	6	0		801	166	nd	nd	nd	32	45	6	122	117	461	112
k__Bacteria_p__Planctomycetes_c__Phycisphaerae_o__Phycisphaerales_f__Phycisphaeraceae_g___s__	0	0	0	0	0	0	2	44	0	0	0	0		0	3	nd	nd	nd	0	0	0	0	0	17	0
k__Bacteria_p__Planctomycetes_c__Phycisphaerae_o__Phycisphaerales_f__Phycisphaeraceae_NA_NA	0	0	0	0	0	0	5	0	0	33	0	0		6	0	nd	nd	nd	0	0	0	0	0	0	0
k__Bacteria_p__Planctomycetes_c__Phycisphaerae_o__Phycisphaerales_NA_NA_NA	0	0	0	0	0	0	0	0	4	3	0	0		0	0	nd	nd	nd	0	0	0	0	4	0	0
k__Bacteria_p__Planctomycetes_c__Phycisphaerae_o__Pla1_f___g___s__	0	0	0	0	0	0	0	0	0	21	0	0		0	0	nd	nd	nd	0	0	0	0	0	0	0
k__Bacteria_p__Planctomycetes_c__Phycisphaerae_o__S70_f___g___s__	0	0	0	3	10	6	0	72	35	3	0	0		5	0	nd	nd	nd	0	0	0	0	0	0	0
k__Bacteria_p__Planctomycetes_c__Phycisphaerae_o__WD2101_f___g___s__	0	38	0	0	10	56	94	145	119	172	8	11		746	40	nd	nd	nd	4	169	0	140	46	264	88
k__Bacteria_p__Planctomycetes_c__Pla3_o___f___g___s__	0	0	20	0	0	0	0	0	0	17	0	2		48	2	nd	nd	nd	0	0	0	8	13	106	0
k__Bacteria_p__Planctomycetes_c__Pla4_o___f___g___s__	0	0	0	0	20	0	52	0	80	63	0	0		0	0	nd	nd	nd	0	17	24	33	28	0	0
k__Bacteria_p__Planctomycetes_c__Planctomycetia_o__B97_f___g___s__	0	0	0	0	0	0	8	0	0	0	0	0		113	5	nd	nd	nd	0	152	13	34	5	26	0
k__Bacteria_p__Planctomycetes_c__Planctomycetia_o__Gemmatales_f__Gemmataceae_g___s__	172	8	589	11	71	138	403	755	486	918	103	12		1344	232	nd	nd	nd	110	511	88	1199	538	1554	230
k__Bacteria_p__Planctomycetes_c__Planctomycetia_o__Gemmatales_f__Gemmataceae_g__Gemmata_NA	0	0	0	0	0	0	0	27	0	5	0	0		0	0	nd	nd	nd	0	0	0	0	2	0	0
k__Bacteria_p__Planctomycetes_c__Planctomycetia_o__Gemmatales_f__Gemmataceae_g__Gemmata_s__	5	69	210	34	30	104	230	253	156	189	42	62		3720	597	nd	nd	nd	391	477	80	778	182	1448	350
k__Bacteria_p__Planctomycetes_c__Planctomycetia_o__Gemmatales_f__Gemmataceae_g__Gemmata_s__obscuriglobus	0	0	0	0	0	0	0	0	0	10	0	0		0	0	nd	nd	nd	0	0	0	0	0	0	0
k__Bacteria_p__Planctomycetes_c__Planctomycetia_o__Gemmatales_f__Gemmataceae_NA_NA	0	0	0	0	0	0	0	0	0	7	0	0		59	0	nd	nd	nd	3	30	0	32	15	66	0
k__Bacteria_p__Planctomycetes_c__Planctomycetia_o__Gemmatales_f__Isosphaeraceae_g___s__	0	7	70	46	0	16	69	26	55	108	17	0		215	19	nd	nd	nd	0	27	0	88	9	15	0
k__Bacteria_p__Planctomycetes_c__Planctomycetia_o__Gemmatales_f__Isosphaeraceae_g__Isosphaera_s__	0	0	21	0	0	0	0	0	0	0	0	0		4	0	nd	nd	nd	0	0	0	8	0	0	0
k__Bacteria_p__Planctomycetes_c__Planctomycetia_o__Gemmatales_f__Isosphaeraceae_g__Nostocoida_s__limicola	0	0	0	0	0	0	0	49	0	0	0	0		0	0	nd	nd	nd	0	0	0	0	0	0	0
k__Bacteria_p__Planctomycetes_c__Planctomycetia_o__Gemmatales_f__Isosphaeraceae_NA_NA	0	0	0	0	0	0	38	0	0	0	0	0		0	0	nd	nd	nd	0	0	0	0	0	0	0
k__Bacteria_p__Planctomycetes_c__Planctomycetia_o__Pirellulales_f__Pirellulaceae_g___s__	32	80	131	67	91	183	316	203	198	497	74	36		1047	79	nd	nd	nd	25	280	0	442	240	1091	242
k__Bacteria_p__Planctomycetes_c__Planctomycetia_o__Pirellulales_f__Pirellulaceae_g__A17_s__	0	0	22	0	8	0	72	14	117	134	22	0		228	73	nd	nd	nd	0	42	25	102	82	134	131
k__Bacteria_p__Planctomycetes_c__Planctomycetia_o__Pirellulales_f__Pirellulaceae_g__Pirellula_s__	0	0	100	0	2	10	46	12	148	73	14	5		213	0	nd	nd	nd	9	64	35	83	73	204	57
k__Bacteria_p__Planctomycetes_c__Planctomycetia_o__Pirellulales_f__Pirellulaceae_g__Planctomycete_s__LF1	0	0	19	0	0	0	0	0	0	0	0	0		0	0	nd	nd	nd	0	0	0	0	0	0	0
k__Bacteria_p__Planctomycetes_c__Planctomycetia_o__Pirellulales_f__Pirellulaceae_NA_NA	0	0	0	0	0	10	0	0	0	49	2	0		0	2	nd	nd	nd	7	0	0	5	0	0	2
k__Bacteria_p__Planctomycetes_c__Planctomycetia_o__Planctomycetales_f__Planctomycetaceae_g__Planctomyces_s__	7	33	159	68	19	163	193	101	193	360	86	35		1127	45	nd	nd	nd	16	63	36	329	152	343	260
k__Bacteria_p__Planctomycetes_c__vadinHA49_NA_NA_NA_NA	0	13	0	0	0	0	0	0	0	0	0	0		0	0	nd	nd	nd	0	0	0	0	0	0	0
k__Bacteria_p__Planctomycetes_c__vadinHA49_o___f___g___s__	0	40	0	0	0	0	0	0	0	0	0	0		0	0	nd	nd	nd	0	0	0	0	0	0	0
k__Bacteria_p__Planctomycetes_c__vadinHA49_o__DH61_f___g___s__	0	184	361	71	214	450	458	704	614	407	406	435		3012	818	nd	nd	nd	8	25	0	225	253	464	644
k__Bacteria_p__Planctomycetes_c__vadinHA49_o__p04_C01_f___g___s__	0	22	44	8	4	0	15	0	0	57	0	5		70	0	nd	nd	nd	0	9	0	6	3	0	30
k__Bacteria_p__Planctomycetes_c__vadinHA49_o__PeHg47_f___g___s__	0	0	0	0	3	0	0	0	0	0	0	0		0	0	nd	nd	nd	0	0	0	0	0	0	0
k__Bacteria_p__Planctomycetes_NA_NA_NA_NA_NA	0	0	0	4	0	8	0	4	9	4	0	0		17	5	nd	nd	nd	0	0	0	12	5	52	3
k__Bacteria_p__Proteobacteria_c___o___f___g___s__	7	0	0	6	15	5	7	0	29	22	0	0		0	0	nd	nd	nd	2	0	0	0	9	13	8
k__Bacteria_p__Proteobacteria_c__Alphaproteobacteria_NA_NA_NA_NA	15	200	317	129	254	211	487	511	489	521	201	457		1260	336	nd	nd	nd	280	607	70	323	520	626	653
k__Bacteria_p__Proteobacteria_c__Alphaproteobacteria_o___f___g___s__	7	139	212	126	529	396	557	399	301	758	122	280		1062	869	nd	nd	nd	120	205	63	407	461	737	533
k__Bacteria_p__Proteobacteria_c__Alphaproteobacteria_o__BD73_f___g___s__	140	48	24	25	168	75	268	143	107	253	51	56		210	0	nd	nd	nd	0	0	0	0	0	0	0
k__Bacteria_p__Proteobacteria_c__Alphaproteobacteria_o__Caulobacterales_f__Caulobacteraceae_g___s__	0	44	270	0	60	14	62	129	53	219	74	52		336	48	nd	nd	nd	380	244	0	237	178	334	204
k__Bacteria_p__Proteobacteria_c__Alphaproteobacteria_o__Caulobacterales_f__Caulobacteraceae_g__Arthrospira_s__	0	0	0	13	81	0	0	54	0	23	0	0		0	0	nd	nd	nd	84	0	33	0	14	42	0
k__Bacteria_p__Proteobacteria_c__Alphaproteobacteria_o__Caulobacterales_f__Caulobacteraceae_g__Asticcacaulis_s__	0	29	0	19	110	41	54	12	90	60	27	42		0	40	nd	nd	nd	853	65	443	117	71	35	102
k__Bacteria_p__Proteobacteria_c__Alphaproteobacteria_o__Caulobacterales_f__Caulobacteraceae_g__Asticcacaulis_s__biprosthecium	25	0	0	0	67	0	58	0	60	27	41	43		85	0	nd	nd	nd	83	0	224	46	36	0	68
k__Bacteria_p__Proteobacteria_c__Alphaproteobacteria_o__Caulobacterales_f__Caulobacteraceae_g__Brevundimonas_s__diminuta	0	0	84	15	5	0	0	0	0	0	0	0		0	0	nd	nd	nd	0	0	0	0	0	0	0
k__Bacteria_p__Proteobacteria_c__Alphaproteobacteria_o__Caulobacterales_f__Caulobacteraceae_g__Caulobacter_NA	24	0	0	20	132	0	53	0	0	0	0	0		0	0	nd	nd	nd	0	98	0	52	0	101	0
k__Bacteria_p__Proteobacteria_c__Alphaproteobacteria_o__Caulobacterales_f__Caulobacteraceae_g__Caulobacter_s__	0	125	0	40	974	275	24	13	73	128	108	268		64	20	nd	nd	nd	256	290	0	345	107	75	28
k__Bacteria_p__Proteobacteria_c__Alphaproteobacteria_o__Caulobacterales_f__Caulobacteraceae_g__Caulobacter_s__henricii	0	0	19	142	52	85	50	17	0	0	0	0		0	0	nd	nd	nd	43	20	386	0	0	0	0
k__Bacteria_p__Proteobacteria_c__Alphaproteobacteria_o__Caulobacterales_f__Caulobacteraceae_g__Mycoplana_s__	36	141	86	61	667	228	230	104	178	214	289	248		843	562	nd	nd	nd	3899	548	216	590	463	688	195
k__Bacteria_p__Proteobacteria_c__Alphaproteobacteria_o__Caulobacterales_f__Caulobacteraceae_g__Phenylobacterium_s__	0	4	800	33	378	134	116	52	83	210	32	72		72	45	nd	nd	nd	82	161	68	624	50	148	53
k__Bacteria_p__Proteobacteria_c__Alphaproteobacteria_o__Caulobacterales_f__Caulobacteraceae_NA_NA	0	0	0	0	52	0	10	22	42	22	0	25		369	54	nd	nd	nd	15	19	0	164	147	39	146
k__Bacteria_p__Proteobacteria_c__Alphaproteobacteria_o__Caulobacterales_g__Asticcacaulis_s__biprosthecium_0	0	0	0	0	0	0	0	0	0	0	0	0		0	0	nd	nd	nd	0	0	0	0	0	0	0
k__Bacteria_p__Proteobacteria_c__Alphaproteobacteria_o__Ellin329_f___g___s__	0	12	5	2	120	15	126	54	252	103	37	9		61	0	nd	nd	nd	0	67	0	146	102	66	130
k__Bacteria_p__Proteobacteria_c__Alphaproteobacteria_o__Kiloniellales_f___g___s__	0	8	0	0	0	31	12	0	0	0	0	0		0	0	nd	nd	nd	0	0	0	0	0	0	0
k__Bacteria_p__Proteobacteria_c__Alphaproteobacteria_o__RF32_f___g___s__	0	25	0	0	0	0	0	99	0	12	0	2		7	0	nd	nd	nd	0	0	0	0	0	0	0
k__Bacteria_p__Proteobacteria_c__Alphaproteobacteria_o__Rhizobiales_f___g___s__	0	71	86	133	134	347	753	218	445	590	164	596		652	33	nd	nd	nd	18	216	164	415	209	480	1285
k__Bacteria_p__Proteobacteria_c__Alphaproteobacteria_o__Rhizobiales_f__Aurantimonadaceae_g___s__	0	9	101	82	108	198	133	0	0	11	0	73		46	30	nd	nd	nd	2098	163	6	41	0	74	0
k__Bacteria_p__Proteobacteria_c__Alphaproteobacteria_o__Rhizobiales_f__Aurantimonadaceae_NA_NA	0	0	0	0	0	0	0	0	0	15	0	0		0	0	nd	nd	nd	0	0	0	0	0	0	0
k__Bacteria_p__Proteobacteria_c__Alphaproteobacteria_o__Rhizobiales_f__Bartonellaceae_g___s__	0	9	0	0	0	0	0	0	0	0	0	0		0	0	nd	nd	nd	0	0	0	0	0	0	0
k__Bacteria_p__Proteobacteria_c__Alphaproteobacteria_o__Rhizobiales_f__Beijerinckiaceae_g___s__	0	0	0	0	19	32	31	14	0	15	0	0		36	0	nd	nd	nd	132	433	54	190	22	16	0
k__Bacteria_p__Proteobacteria_c__Alphaproteobacteria_o__Rhizobiales_f__Beijerinckiaceae_g__Beijerinckia_s__	0	0	0	0	0	0	12	0	0	40	0	55		35	0	nd	nd	nd	8	15	0	48	0	0	0
k__Bacteria_p__Proteobacteria_c__Alphaproteobacteria_o__Rhizobiales_f__Beijerinckiaceae_g__Methylocella_s__	0	0	0	0	0	0	0	0	0	15	0	0		0	0	nd	nd	nd	0	0	0	0	0	0	0
k__Bacteria_p__Proteobacteria_c__Alphaproteobacteria_o__Rhizobiales_f__Beijerinckiaceae_NA_NA	0	0	68	0	20	0	0	0	0	0	0	0		0	0	nd	nd	nd	0	6	0	0	0	25	0
k__Bacteria_p__Proteobacteria_c__Alphaproteobacteria_o__Rhizobiales_f__Bradyrhizobiaceae_g___s__	0	276	0	294	49	203	268	0	0	6	0	0		73	33	nd	nd	nd	42	78	0	502	0	111	0
k__Bacteria_p__Proteobacteria_c__Alphaproteobacteria_o__Rhizobiales_f__Bradyrhizobiaceae_g__Balneimonas_s__	0	0	0	0	0	0	10	0	0	0	0	0		23	0	nd	nd	nd	0	27	0	7	0	0	0
k__Bacteria_p__Proteobacteria_c__Alphaproteobacteria_o__Rhizobiales_f__Bradyrhizobiaceae_g__Bosea_s__genosp	0	0	0	482	161	301	199	42	144	80	17	0		0	0	nd	nd	nd	0	0	0	0	0	0	0
k__Bacteria_p__Proteobacteria_c__Alphaproteobacteria_o__Rhizobiales_f__Bradyrhizobiaceae_g__Bradyrhizobium_s__	0	17	275	107	199	124	241	142	266	192	85	155		210	19	nd	nd	nd	0	136	13	237	192	110	257
k__Bacteria_p__Proteobacteria_c__Alphaproteobacteria_o__Rhizobiales_f__Bradyrhizobiaceae_NA_NA	0	5	0	0	20	0	0	0	0	0	0	0		0	0	nd	nd	nd	0	105	0	0	0	34	0
k__Bacteria_p__Proteobacteria_c__Alphaproteobacteria_o__Rhizobiales_f__Brucellaceae_g__Ochrobactrum_s__	0	7	0	0	0	7	0	0	0	0	0	0		0	0	nd	nd	nd	0	0	0	0	0	0	0
k__Bacteria_p__Proteobacteria_c__Alphaproteobacteria_o__Rhizobiales_f__Hyphomicrobiaceae_g___s__	0	0	0	15	34	67	60	0	17	103	0	0		381	136	nd	nd	nd	49	198	0	418	106	328	118
k__Bacteria_p__Proteobacteria_c__Alphaproteobacteria_o__Rhizobiales_f__Hyphomicrobiaceae_g__Devosia_s__	0	86	45	55	235	155	140	0	316	245	47	149		201	90	nd	nd	nd	1301	1040	511	429	195	199	301
k__Bacteria_p__Proteobacteria_c__Alphaproteobacteria_o__Rhizobiales_f__Hyphomicrobiaceae_g__Hyphomicrobium_NA	0	0	0	0	0	0	10	0	0	24	0	0		150	0	nd	nd	nd	0	13	0	0	41	28	0
k__Bacteria_p__Proteobacteria_c__Alphaproteobacteria_o__Rhizobiales_f__Hyphomicrobiaceae_g__Hyphomicrobium_s__	27	66	152	47	199	144	415	217	379	452	225	348		1329	151	nd	nd	nd	92	187	45	563	538	1120	698
k__Bacteria_p__Proteobacteria_c__Alphaproteobacteria_o__Rhizobiales_f__Hyphomicrobiaceae_g__Parvibaculum_s__	0	0	0	0	0	0	0	0	0	15	0	0		0	0	nd	nd	nd	0	0	0	0	0	0	0
k__Bacteria_p__Proteobacteria_c__Alphaproteobacteria_o__Rhizobiales_f__Hyphomicrobiaceae_g__Pedomicrobium_s__	0	3	51	17	53	52	62	53	175	185	0	0		240	97	nd	nd	nd	68	163	11	285	137	347	288
k__Bacteria_p__Proteobacteria_c__Alphaproteobacteria_o__Rhizobiales_f__Hyphomicrobiaceae_g__Pedomicrobium_s__australicum	0	0	0	0	0	10	0	0	0	0	0	0		0	0	nd	nd	nd	0	0	0	0	0	0	0
k__Bacteria_p__Proteobacteria_c__Alphaproteobacteria_o__Rhizobiales_f__Hyphomicrobiaceae_g__Rhodoplanes_s__	26	48	51	115	397	323	689	312	649	681	75	170		1137	179	nd	nd	nd	77	255	67	1177	950	1221	1098
k__Bacteria_p__Proteobacteria_c__Alphaproteobacteria_o__Rhizobiales_f__Hyphomicrobiaceae_g__Rhodoplanes_s__elegans	0	0	0	0	0	0	0	0	22	0	0	0		0	0	nd	nd	nd	0	0	0	0	0	0	0
k__Bacteria_p__Proteobacteria_c__Alphaproteobacteria_o__Rhizobiales_f__Hyphomicrobiaceae_NA_NA	0	0	17	0	0	28	31	0	49	41	35	8		0	0	nd	nd	nd	0	0	0	0	0	0	0
k__Bacteria_p__Proteobacteria_c__Alphaproteobacteria_o__Rhizobiales_f__Methylobacteriaceae_g___s__	0	0	45	10	21	41	16	0	62	10	0	18		26	0	nd	nd	nd	112	12	0	145	0	41	0
k__Bacteria_p__Proteobacteria_c__Alphaproteobacteria_o__Rhizobiales_f__Methylobacteriaceae_g__Methylobacterium_NA	0	18	0	0	27	29	44	120	0	0	0	11		65	25	nd	nd	nd	1185	0	0	16	11	0	21
k__Bacteria_p__Proteobacteria_c__Alphaproteobacteria_o__Rhizobiales_f__Methylobacteriaceae_g__Methylobacterium_s__	0	43	37	48	91	195	132	109	36	45	25	30		83	0	nd	nd	nd	2437	295	0	35	12	98	80
k__Bacteria_p__Proteobacteria_c__Alphaproteobacteria_o__Rhizobiales_f__Methylobacteriaceae_g__Methylobacterium_s__adhaesivum	0	0	0	11	0	42	0	0	7	0	0	26		82	0	nd	nd	nd	143	65	0	0	0	19	20
k__Bacteria_p__Proteobacteria_c__Alphaproteobacteria_o__Rhizobiales_f__Methylobacteriaceae_g__Methylobacterium_s__organophilum	0	16	12	44	70	42	64	0	0	0	5	12		0	0	nd	nd	nd	482	283	0	28	0	39	0
k__Bacteria_p__Proteobacteria_c__Alphaproteobacteria_o__Rhizobiales_f__Methylocystaceae_g___s__	0	44	0	7	15	97	69	0	81	96	0	148		37	0	nd	nd	nd	437	256	26	10	18	29	15
k__Bacteria_p__Proteobacteria_c__Alphaproteobacteria_o__Rhizobiales_f__Methylocystaceae_g__Methylopila_s__	0	0	0	0	0	6	7	0	0	0	0	0		0	0	nd	nd	nd	10	14	0	15	0	0	0
k__Bacteria_p__Proteobacteria_c__Alphaproteobacteria_o__Rhizobiales_f__Methylocystaceae_g__Methylosinus_s__	0	0	42	0	177	38	20	0	100	58	27	120		0	0	nd	nd	nd	0	0	0	0	0	0	0
k__Bacteria_p__Proteobacteria_c__Alphaproteobacteria_o__Rhizobiales_f__Methylocystaceae_g__Pleomorphomonas_s__	0	29	6	0	10	0	0	0	141	43	13	23		58	0	nd	nd	nd	0	17	0	0	0	42	50
k__Bacteria_p__Proteobacteria_c__Alphaproteobacteria_o__Rhizobiales_f__Methylocystaceae_g__Rhodoblastus_s__acidophilus	0	0	0	0	0	0	0	0	0	0	0	0		0	0	nd	nd	nd	0	0	0	0	0	0	0
k__Bacteria_p__Proteobacteria_c__Alphaproteobacteria_o__Rhizobiales_f__Methylocystaceae_NA_NA	0	0	0	0	0	0	0	0	0	0	6	0		0	0	nd	nd	nd	0	0	0	16	0	35	0
k__Bacteria_p__Proteobacteria_c__Alphaproteobacteria_o__Rhizobiales_f__Phyllobacteriaceae_g___s__	0	0	8	0	19	10	64	0	15	27	15	18		17	16	nd	nd	nd	96	158	0	0	0	20	52
k__Bacteria_p__Proteobacteria_c__Alphaproteobacteria_o__Rhizobiales_f__Phyllobacteriaceae_g__Aminobacter_s__	0	0	0	33	19	0	29	0	0	0	0	0		60	0	nd	nd	nd	0	51	0	89	0	21	50
k__Bacteria_p__Proteobacteria_c__Alphaproteobacteria_o__Rhizobiales_f__Phyllobacteriaceae_g__Chelativorans_s__	0	0	0	0	0	11	0	0	0	0	0	0		0	0	nd	nd	nd	0	0	0	0	0	0	0
k__Bacteria_p__Proteobacteria_c__Alphaproteobacteria_o__Rhizobiales_f__Phyllobacteriaceae_g__Mesorhizobium_s__	0	23	0	453	127	105	411	15	152	79	19	31		355	17	nd	nd	nd	158	147	0	243	263	213	212
k__Bacteria_p__Proteobacteria_c__Alphaproteobacteria_o__Rhizobiales_f__Rhizobiaceae_g___s__	0	0	22	0	0	26	81	0	0	51	0	0		0	0	nd	nd	nd	93	27	280	0	20	0	0
k__Bacteria_p__Proteobacteria_c__Alphaproteobacteria_o__Rhizobiales_f__Rhizobiaceae_g__Agrobacterium_NA	0	0	0	0	0	13	0	0	0	0	0	0		0	0	nd	nd	nd	0	0	0	0	0	0	0
k__Bacteria_p__Proteobacteria_c__Alphaproteobacteria_o__Rhizobiales_f__Rhizobiaceae_g__Agrobacterium_s__	0	114	121	88	150	402	200	114	184	93	131	364		89	55	nd	nd	nd	3471	1555	0	296	153	105	140
k__Bacteria_p__Proteobacteria_c__Alphaproteobacteria_o__Rhizobiales_f__Rhizobiaceae_g__Rhizobium_NA	0	0	0	0	0	0	0	0	75	0	0	0		0	8	nd	nd	nd	0	0	0	0	15	0	0
k__Bacteria_p__Proteobacteria_c__Alphaproteobacteria_o__Rhizobiales_f__Rhizobiaceae_g__Rhizobium_s__	15	10	0	6	48	0	18	0	30	56	15	49		7	0	nd	nd	nd	50	19	0	35	0	0	17
k__Bacteria_p__Proteobacteria_c__Alphaproteobacteria_o__Rhizobiales_f__Rhizobiaceae_g__Shinella_s__	0	0	0	0	0	15	0	0	0	0	0	0		0	0	nd	nd	nd	0	0	0	0	0	0	0
k__Bacteria_p__Proteobacteria_c__Alphaproteobacteria_o__Rhizobiales_f__Rhizobiaceae_g__Shinella_s__granuli	0	0	34	0	0	0	0	0	0	0	0	0		0	0	nd	nd	nd	0	16	0	0	0	0	0
k__Bacteria_p__Proteobacteria_c__Alphaproteobacteria_o__Rhizobiales_f__Rhizobiaceae_NA_NA	0	15	21	89	10	16	57	102	0	16	0	0		0	47	nd	nd	nd	74	45	0	62	6	0	0
k__Bacteria_p__Proteobacteria_c__Alphaproteobacteria_o__Rhizobiales_f__Rhodobiaceae_g__Afifella_s__	0	5	0	0	0	0	5	0	16	19	0	0		20	0	nd	nd	nd	0	15	0	39	14	0	0
k__Bacteria_p__Proteobacteria_c__Alphaproteobacteria_o__Rhizobiales_f__Xanthobacteraceae_g___s__	0	32	0	48	36	109	40	0	18	68	24	43		10	0	nd	nd	nd	117	168	0	42	0	26	17
k__Bacteria_p__Proteobacteria_c__Alphaproteobacteria_o__Rhizobiales_f__Xanthobacteraceae_g__Labrys_s__	0	0	0	5	0	19	0	0	0	28	0	0		23	0	nd	nd	nd	0	0	0	9	0	0	9
k__Bacteria_p__Proteobacteria_c__Alphaproteobacteria_o__Rhizobiales_f__Xanthobacteraceae_NA_NA	0	5	44	8	25	0	0	0	8	28	7	0		80	3	nd	nd	nd	16	0	0	16	8	0	74
k__Bacteria_p__Proteobacteria_c__Alphaproteobacteria_o__Rhizobiales_NA_NA_NA	0	29	190	115	72	68	210	59	235	147	17	284		712	38	nd	nd	nd	470	677	20	421	91	208	261
k__Bacteria_p__Proteobacteria_c__Alphaproteobacteria_o__Rhodobacterales_f___g___s__	0	0	0	0	0	0	0	0	0	0	0	0		0	0	nd	nd	nd	0	0	0	0	0	0	0
k__Bacteria_p__Proteobacteria_c__Alphaproteobacteria_o__Rhodobacterales_f__Hyphomonadaceae_g___s__	0	135	93	119	646	204	410	404	630	371	299	457		1936	413	nd	nd	nd	143	318	85	849	707	1069	1861
k__Bacteria_p__Proteobacteria_c__Alphaproteobacteria_o__Rhodobacterales_f__Hyphomonadaceae_g__Hyphomonas_s__	0	0	8	14	0	0	6	0	3	0	23	0		131	23	nd	nd	nd	0	0	0	28	26	16	111
k__Bacteria_p__Proteobacteria_c__Alphaproteobacteria_o__Rhodobacterales_f__Hyphomonadaceae_NA_NA	0	0	0	0	7	0	0	0	0	2	0	0		0	0	nd	nd	nd	0	0	0	8	9	0	0
k__Bacteria_p__Proteobacteria_c__Alphaproteobacteria_o__Rhodobacterales_f__Rhodobacteraceae_g___s__	0	0	0	0	20	3	0	0	0	0	0	0		28	16	nd	nd	nd	3	0	0	0	37	0	8
k__Bacteria_p__Proteobacteria_c__Alphaproteobacteria_o__Rhodobacterales_f__Rhodobacteraceae_g__Amaricoccus_s__	0	0	117	0	0	0	40	311	0	59	0	0		1282	143	nd	nd	nd	230	434	110	402	282	732	179
k__Bacteria_p__Proteobacteria_c__Alphaproteobacteria_o__Rhodobacterales_f__Rhodobacteraceae_g__Anaerospora_s__	0	20	0	20	36	0	49	93	25	26	0	57		237	54	nd	nd	nd	243	201	0	89	36	113	258
k__Bacteria_p__Proteobacteria_c__Alphaproteobacteria_o__Rhodobacterales_f__Rhodobacteraceae_g__Paracoccus_NA	0	0	81	0	0	19	0	0	0	0	0	0		0	0	nd	nd	nd	0	29	0	0	0	0	0
k__Bacteria_p__Proteobacteria_c__Alphaproteobacteria_o__Rhodobacterales_f__Rhodobacteraceae_g__Paracoccus_s__	0	0	171	0	0	0	0	0	0	0	0	0		0	0	nd	nd	nd	0	0	62	0	33	0	0
k__Bacteria_p__Proteobacteria_c__Alphaproteobacteria_o__Rhodobacterales_f__Rhodobacteraceae_g__Paracoccus_s__kawasakiensis	0	0	0	2	0	0	0	0	0	0	0	0		0	0	nd	nd	nd	0	0	0	0	0	0	0
k__Bacteria_p__Proteobacteria_c__Alphaproteobacteria_o__Rhodobacterales_f__Rhodobacteraceae_g__Paracoccus_s__marcusii	0	0	39	0	0	0	0	0	0	0	0	0		0	57	nd	nd	nd	0	0	0	0	0	0	0
k__Bacteria_p__Proteobacteria_c__Alphaproteobacteria_o__Rhodobacterales_f__Rhodobacteraceae_g__Rhodobaca_s__	0	0	0	0	0	0	0	0	0	0	0	0		0	0	nd	nd	nd	0	0	0	0	0	0	0
k__Bacteria_p__Proteobacteria_c__Alphaproteobacteria_o__Rhodobacterales_f__Rhodobacteraceae_g__Rhodobacter_NA	0	0	0	0	0	0	0	0	73	0	0	0		0	0	nd	nd	nd	0	0	0	0	0	0	0
k__Bacteria_p__Proteobacteria_c__Alphaproteobacteria_o__Rhodobacterales_f__Rhodobacteraceae_g__Rhodobacter_s__	11	1977	2158	7053	1257	2899	3034	498	848	894	1747	3335		3984	342	nd	nd	nd	1484	750	145	790	490	982	3854
k__Bacteria_p__Proteobacteria_c__Alphaproteobacteria_o__Rhodobacterales_f__Rhodobacteraceae_g__Rhodovulum_s__	0	0	31	0	0	0	0	0	0	0	0	0		0	0	nd	nd	nd	0	0	0	0	0	0	0
k__Bacteria_p__Proteobacteria_c__Alphaproteobacteria_o__Rhodobacterales_f__Rhodobacteraceae_g__Rubellimicrobium_s__	0	0	0	0	0	36	7	0	0	7	0	0		23	0	nd	nd	nd	165	64	0	71	10	297	0
k__Bacteria_p__Proteobacteria_c__Alphaproteobacteria_o__Rhodobacterales_f__Rhodobacteraceae_NA_NA	0	0	37	89	0	37	98	31	0	15	0	3		220	0	nd	nd	nd	1348	47	0	98	150	215	135
k__Bacteria_p__Proteobacteria_c__Alphaproteobacteria_o__Rhodobacterales_NA_NA_NA	0	0	0	0	0	12	0	0	0	75	0	0		54	0	nd	nd	nd	0	0	0	0	16	31	28
k__Bacteria_p__Proteobacteria_c__Alphaproteobacteria_o__Rhodospirillales_f___g___s__	0	0	31	0	25	0	87	141	50	105	0	22		1711	140	nd	nd	nd	568	431	11	1059	297	664	275
k__Bacteria_p__Proteobacteria_c__Alphaproteobacteria_o__Rhodospirillales_f__Acetobacteraceae_g___s__	0	77	30	38	65	182	276	110	34	156	15	321		1653	109	nd	nd	nd	536	587	0	781	208	360	366
k__Bacteria_p__Proteobacteria_c__Alphaproteobacteria_o__Rhodospirillales_f__Acetobacteraceae_g__Acidisoma_s__	0	0	0	0	0	0	0	0	0	28	0	0		0	0	nd	nd	nd	0	0	0	6	0	0	0
k__Bacteria_p__Proteobacteria_c__Alphaproteobacteria_o__Rhodospirillales_f__Acetobacteraceae_g__Acidocella_s__	0	0	0	0	0	0	0	0	0	0	0	0		0	0	nd	nd	nd	0	0	0	0	0	0	0
k__Bacteria_p__Proteobacteria_c__Alphaproteobacteria_o__Rhodospirillales_f__Acetobacteraceae_g__Roseococcus_s__	0	11	75	5	0	19	85	61	84	43	41	85		218	0	nd	nd	nd	51	252	0	87	55	75	6
k__Bacteria_p__Proteobacteria_c__Alphaproteobacteria_o__Rhodospirillales_f__Acetobacteraceae_g__Roseomonas_s__	0	0	0	0	0	8	10	44	26	12	2	9		586	34	nd	nd	nd	96	189	18	271	75	161	109
k__Bacteria_p__Proteobacteria_c__Alphaproteobacteria_o__Rhodospirillales_f__Acetobacteraceae_g__Swaminathania_s__	0	0	0	0	0	0	0	20	0	0	0	0		65	0	nd	nd	nd	0	0	0	0	0	0	0
k__Bacteria_p__Proteobacteria_c__Alphaproteobacteria_o__Rhodospirillales_f__Acetobacteraceae_NA_NA	0	0	0	0	0	0	0	41	0	18	0	2		84	0	nd	nd	nd	117	125	0	26	60	117	67
k__Bacteria_p__Proteobacteria_c__Alphaproteobacteria_o__Rhodospirillales_f__Rhodospirillaceae_g___s__	203	64	501	24	315	304	514	214	734	786	147	208		842	142	nd	nd	nd	91	649	62	1007	352	557	945
k__Bacteria_p__Proteobacteria_c__Alphaproteobacteria_o__Rhodospirillales_f__Rhodospirillaceae_g__Azospirillum_NA	0	0	3	0	77	7	0	0	0	0	84	48		0	0	nd	nd	nd	0	0	0	3	0	8	0
k__Bacteria_p__Proteobacteria_c__Alphaproteobacteria_o__Rhodospirillales_f__Rhodospirillaceae_g__Azospirillum_s__	0	182	0	12	157	103	11	0	0	17	0	218		52	78	nd	nd	nd	16	66	0	0	0	0	35
k__Bacteria_p__Proteobacteria_c__Alphaproteobacteria_o__Rhodospirillales_f__Rhodospirillaceae_g__Azospirillum_s__amazonense	0	0	0	0	18	0	6	0	0	10	0	0		0	0	nd	nd	nd	0	0	0	0	0	0	0
k__Bacteria_p__Proteobacteria_c__Alphaproteobacteria_o__Rhodospirillales_f__Rhodospirillaceae_g__Azospirillum_s__irakense	0	0	15	91	0	28	0	0	0	0	0	0		0	0	nd	nd	nd	0	77	0	0	0	0	0
k__Bacteria_p__Proteobacteria_c__Alphaproteobacteria_o__Rhodospirillales_f__Rhodospirillaceae_g__Azospirillum_s__massiliensis	0	25	0	60	76	115	45	0	0	15	8	16		20	71	nd	nd	nd	165	9	0	46	17	0	0
k__Bacteria_p__Proteobacteria_c__Alphaproteobacteria_o__Rhodospirillales_f__Rhodospirillaceae_g__Elstera_s__litoralis	0	30	0	19	0	53	15	6	0	49	10	180		0	16	nd	nd	nd	81	0	0	15	8	0	40
k__Bacteria_p__Proteobacteria_c__Alphaproteobacteria_o__Rhodospirillales_f__Rhodospirillaceae_g__Inquilinus_s__	0	0	0	0	0	0	0	0	3	0	0	0		0	0	nd	nd	nd	0	0	0	0	0	0	0
k__Bacteria_p__Proteobacteria_c__Alphaproteobacteria_o__Rhodospirillales_f__Rhodospirillaceae_g__Magnetospirillum_s__	0	14	0	0	0	27	37	0	16	0	4	27		158	17	nd	nd	nd	0	0	0	12	0	0	26
k__Bacteria_p__Proteobacteria_c__Alphaproteobacteria_o__Rhodospirillales_f__Rhodospirillaceae_g__Novispirillum_s__	0	27	46	542	16	46	0	0	11	12	5	22		0	0	nd	nd	nd	0	0	0	0	0	0	0
k__Bacteria_p__Proteobacteria_c__Alphaproteobacteria_o__Rhodospirillales_f__Rhodospirillaceae_g__Phaeospirillum_s__	0	0	0	0	9	23	48	0	5	12	4	0		0	0	nd	nd	nd	7	0	0	6	0	0	0
k__Bacteria_p__Proteobacteria_c__Alphaproteobacteria_o__Rhodospirillales_f__Rhodospirillaceae_g__Phaeospirillum_s__fulvum	0	0	15	0	3	0	0	0	0	0	0	0		0	0	nd	nd	nd	84	0	0	0	0	0	0
k__Bacteria_p__Proteobacteria_c__Alphaproteobacteria_o__Rhodospirillales_f__Rhodospirillaceae_g__Telmatospirillum_s__	0	0	0	0	32	21	5	0	0	32	2	0		0	0	nd	nd	nd	0	0	0	0	0	0	0
k__Bacteria_p__Proteobacteria_c__Alphaproteobacteria_o__Rhodospirillales_f__Rhodospirillaceae_NA_NA	0	7	92	17	11	53	84	169	61	65	22	132		236	0	nd	nd	nd	17	8	6	201	125	128	92
k__Bacteria_p__Proteobacteria_c__Alphaproteobacteria_o__Rhodospirillales_NA_NA_NA	0	0	36	10	6	0	0	0	0	13	0	0		15	5	nd	nd	nd	3	53	0	26	2	17	0
k__Bacteria_p__Proteobacteria_c__Alphaproteobacteria_o__Rickettsiales_f____g__	0	0	0	0	16	0	0	0	0	0	0	0		0	0	nd	nd	nd	0	0	0	0	0	0	0
k__Bacteria_p__Proteobacteria_c__Alphaproteobacteria_o__Rickettsiales_f___g___s__	3	91	236	41	124	167	304	125	108	277	158	143		565	371	nd	nd	nd	24	133	0	138	252	177	352
k__Bacteria_p__Proteobacteria_c__Alphaproteobacteria_o__Rickettsiales_f__mitochondria_g___s__	0	4	0	0	7	2	124	30	36	35	13	0		324	0	nd	nd	nd	0	24	26	5	23	109	0
k__Bacteria_p__Proteobacteria_c__Alphaproteobacteria_o__Rickettsiales_f__mitochondria_g__Acanthamoeba_s__castellanii	0	0	5	0	0	0	0	0	0	0	0	0		0	0	nd	nd	nd	0	0	0	0	0	0	0
k__Bacteria_p__Proteobacteria_c__Alphaproteobacteria_o__Rickettsiales_f__mitochondria_g__Chaetosphaeridium_s__globosum	0	0	0	0	0	0	0	0	0	0	0	0		0	0	nd	nd	nd	0	0	0	0	0	0	0
k__Bacteria_p__Proteobacteria_c__Alphaproteobacteria_o__Rickettsiales_f__mitochondria_g__Megaceros_s__tosanus	0	0	0	0	26	0	0	0	0	0	3	0		0	0	nd	nd	nd	0	0	0	0	0	0	0
k__Bacteria_p__Proteobacteria_c__Alphaproteobacteria_o__Rickettsiales_f__mitochondria_g__Ochromonas_s__danica	0	0	0	0	0	0	6	0	0	0	0	0		0	0	nd	nd	nd	0	0	0	0	0	0	0
k__Bacteria_p__Proteobacteria_c__Alphaproteobacteria_o__Rickettsiales_f__mitochondria_g__Phytophthora_s__ramorum	0	0	0	0	0	0	0	0	14	13	0	0		0	0	nd	nd	nd	0	0	0	0	0	0	0
k__Bacteria_p__Proteobacteria_c__Alphaproteobacteria_o__Rickettsiales_f__mitochondria_g__Pythium_s__ultimum	0	18	0	0	0	2	9	9	14	0	39	19		44	34	nd	nd	nd	10	259	0	0	6	175	75
k__Bacteria_p__Proteobacteria_c__Alphaproteobacteria_o__Rickettsiales_f__mitochondria_g__Saprolegnia_s__ferax	0	0	32	0	0	0	6	151	0	0	24	0		189	0	nd	nd	nd	0	0	0	8	0	0	0
k__Bacteria_p__Proteobacteria_c__Alphaproteobacteria_o__Rickettsiales_f__mitochondria_g__Synedra_s__acus	0	0	0	12	0	0	118	38	58	31	17	10		119	0	nd	nd	nd	0	0	0	157	30	258	277
k__Bacteria_p__Proteobacteria_c__Alphaproteobacteria_o__Rickettsiales_f__mitochondria_NA_NA	0	82	1644	9	0	17	1030	401	496	95	70	5		372	97	nd	nd	nd	180	1137	19	134	64	297	17
k__Bacteria_p__Proteobacteria_c__Alphaproteobacteria_o__Rickettsiales_f__Rickettsiaceae_g___s__	0	33	20	18	162	101	240	132	209	167	393	268		285	100	nd	nd	nd	10	98	6	134	193	384	332
k__Bacteria_p__Proteobacteria_c__Alphaproteobacteria_o__Rickettsiales_f__Rickettsiaceae_g__Rickettsia_NA	0	0	0	0	0	0	16	0	0	0	56	156		0	0	nd	nd	nd	6	0	0	0	0	0	0
k__Bacteria_p__Proteobacteria_c__Alphaproteobacteria_o__Rickettsiales_f__Rickettsiaceae_g__Rickettsia_s__	0	10	13	8	0	25	103	0	0	49	39	36		94	0	nd	nd	nd	0	107	0	12	17	56	50
k__Bacteria_p__Proteobacteria_c__Alphaproteobacteria_o__Rickettsiales_f__Rickettsiaceae_NA_NA	0	0	48	0	0	23	4	0	0	0	0	2		0	0	nd	nd	nd	0	0	0	0	0	0	4
k__Bacteria_p__Proteobacteria_c__Alphaproteobacteria_o__Rickettsiales_NA_NA_NA	0	23	38	0	0	12	32	0	3	5	2	3		125	0	nd	nd	nd	13	17	0	16	25	0	5
k__Bacteria_p__Proteobacteria_c__Alphaproteobacteria_o__Sphingomonadales_f___g___s__	6	524	117	687	917	448	631	248	418	388	1389	1570		1167	102	nd	nd	nd	267	61	32	190	295	672	1529
k__Bacteria_p__Proteobacteria_c__Alphaproteobacteria_o__Sphingomonadales_f__Erythrobacteraceae_g___s__	0	78	107	111	62	47	75	0	34	83	47	74		173	218	nd	nd	nd	327	73	0	101	80	52	0
k__Bacteria_p__Proteobacteria_c__Alphaproteobacteria_o__Sphingomonadales_f__Erythrobacteraceae_g__Lutibacterium_s__	0	35	0	137	103	83	148	28	21	72	9	23		181	107	nd	nd	nd	240	119	0	169	143	197	232
k__Bacteria_p__Proteobacteria_c__Alphaproteobacteria_o__Sphingomonadales_f__Erythrobacteraceae_NA_NA	0	0	24	0	2	0	0	45	0	21	0	0		207	151	nd	nd	nd	605	36	0	133	48	409	41
k__Bacteria_p__Proteobacteria_c__Alphaproteobacteria_o__Sphingomonadales_f__Sphingomonadaceae_g___s__	0	317	161	333	328	217	225	269	221	199	154	266		3565	320	nd	nd	nd	2034	750	63	995	570	848	1551
k__Bacteria_p__Proteobacteria_c__Alphaproteobacteria_o__Sphingomonadales_f__Sphingomonadaceae_g__Blastomonas_NA	0	0	0	0	0	0	0	0	0	28	0	0		0	0	nd	nd	nd	0	0	0	0	0	0	42
k__Bacteria_p__Proteobacteria_c__Alphaproteobacteria_o__Sphingomonadales_f__Sphingomonadaceae_g__Blastomonas_s__	0	0	0	35	0	0	0	0	0	0	0	0		30	0	nd	nd	nd	0	21	0	54	18	0	0
k__Bacteria_p__Proteobacteria_c__Alphaproteobacteria_o__Sphingomonadales_f__Sphingomonadaceae_g__Kaistobacter_s__	0	0	237	0	82	155	155	61	50	155	0	154		289	58	nd	nd	nd	0	54	31	148	60	270	81
k__Bacteria_p__Proteobacteria_c__Alphaproteobacteria_o__Sphingomonadales_f__Sphingomonadaceae_g__Novosphingobium_NA	0	50	0	219	0	34	120	0	14	0	0	0		0	0	nd	nd	nd	93	139	0	80	0	0	0
k__Bacteria_p__Proteobacteria_c__Alphaproteobacteria_o__Sphingomonadales_f__Sphingomonadaceae_g__Novosphingobium_s__	0	163	973	393	1137	1108	583	262	486	757	304	502		846	14	nd	nd	nd	1378	1580	61	838	433	628	1636
k__Bacteria_p__Proteobacteria_c__Alphaproteobacteria_o__Sphingomonadales_f__Sphingomonadaceae_g__Novosphingobium_s__capsulatum	0	0	0	0	14	0	42	0	0	0	0	0		0	0	nd	nd	nd	0	0	6	0	0	0	0
k__Bacteria_p__Proteobacteria_c__Alphaproteobacteria_o__Sphingomonadales_f__Sphingomonadaceae_g__Sandaracinobacter_s__sibiricus	0	0	0	0	5	0	14	0	0	0	0	15		748	51	nd	nd	nd	42	26	0	74	13	0	61
k__Bacteria_p__Proteobacteria_c__Alphaproteobacteria_o__Sphingomonadales_f__Sphingomonadaceae_g__Sphingobium_s__	24	32	0	1878	1480	4545	1996	121	954	408	28	14		77	0	nd	nd	nd	1531	5189	389	6776	86	1277	0
k__Bacteria_p__Proteobacteria_c__Alphaproteobacteria_o__Sphingomonadales_f__Sphingomonadaceae_g__Sphingobium_s__xenophagum	0	0	0	0	0	0	0	0	0	21	23	0		0	0	nd	nd	nd	0	33	0	0	0	0	0
k__Bacteria_p__Proteobacteria_c__Alphaproteobacteria_o__Sphingomonadales_f__Sphingomonadaceae_g__Sphingomonas_NA	0	0	0	9	68	5	0	0	0	0	0	2		30	42	nd	nd	nd	75	16	0	34	0	0	0
k__Bacteria_p__Proteobacteria_c__Alphaproteobacteria_o__Sphingomonadales_f__Sphingomonadaceae_g__Sphingomonas_s__	0	147	48	373	522	637	578	256	376	235	167	906		499	119	nd	nd	nd	6434	4086	57	1174	328	439	284
k__Bacteria_p__Proteobacteria_c__Alphaproteobacteria_o__Sphingomonadales_f__Sphingomonadaceae_g__Sphingomonas_s__azotifigens	0	0	0	0	0	208	23	19	0	0	0	0		69	0	nd	nd	nd	269	52	0	501	33	100	0
k__Bacteria_p__Proteobacteria_c__Alphaproteobacteria_o__Sphingomonadales_f__Sphingomonadaceae_g__Sphingomonas_s__echinoides	0	0	0	0	33	17	0	0	14	141	0	114		0	0	nd	nd	nd	1296	0	77	99	55	0	0
k__Bacteria_p__Proteobacteria_c__Alphaproteobacteria_o__Sphingomonadales_f__Sphingomonadaceae_g__Sphingomonas_s__wittichii	11	16	5	7	176	116	126	59	141	224	37	142		62	20	nd	nd	nd	665	760	0	271	61	104	9
k__Bacteria_p__Proteobacteria_c__Alphaproteobacteria_o__Sphingomonadales_f__Sphingomonadaceae_g__Sphingopyxis_s__	0	0	0	61	86	479	481	38	569	192	0	16		0	0	nd	nd	nd	33	99	0	794	54	47	21
k__Bacteria_p__Proteobacteria_c__Alphaproteobacteria_o__Sphingomonadales_f__Sphingomonadaceae_g__Sphingopyxis_s__alaskensis	0	0	12	21	0	27	33	0	0	0	0	0		0	0	nd	nd	nd	0	17	0	0	0	0	0
k__Bacteria_p__Proteobacteria_c__Alphaproteobacteria_o__Sphingomonadales_f__Sphingomonadaceae_g__Zymomonas_s__	0	0	0	0	10	74	144	15	66	32	37	64		259	0	nd	nd	nd	0	0	0	15	24	7	22
k__Bacteria_p__Proteobacteria_c__Alphaproteobacteria_o__Sphingomonadales_f__Sphingomonadaceae_NA_NA	0	0	0	10	51	54	41	111	31	122	0	0		441	119	nd	nd	nd	294	512	26	948	282	248	117
k__Bacteria_p__Proteobacteria_c__Alphaproteobacteria_o__Sphingomonadales_f_Sphingomonadaceae_g__Novosphingobium_s__	0	0	0	0	0	0	0	0	0	0	0	0		0	0	nd	nd	nd	0	0	0	0	0	0	0
k__Bacteria_p__Proteobacteria_c__Alphaproteobacteria_o__Sphingomonadales_NA__0	0	0	0	0	0	0	0	0	0	0	0	0		0	0	nd	nd	nd	0	0	0	0	0	0	0
k__Bacteria_p__Proteobacteria_c__Alphaproteobacteria_o__Sphingomonadales_NA_NA_NA	0	0	0	20	0	0	25	69	0	33	0	0		20	0	nd	nd	nd	0	17	76	15	0	16	16
k__Bacteria_p__Proteobacteria_c__Alphaproteobacteria_o__Sphingomonadales_s____0	0	0	0	0	0	0	0	0	0	0	0	0		0	0	nd	nd	nd	0	0	0	0	0	0	0
k__Bacteria_p__Proteobacteria_c__Betaproteobacteria_NA_NA_NA_NA	0	124	114	54	145	318	316	310	294	514	180	138		1309	73	nd	nd	nd	73	172	25	80	31	73	346
k__Bacteria_p__Proteobacteria_c__Betaproteobacteria_o___f___g___s__	0	51	233	32	397	167	356	131	439	664	118	306		1142	246	nd	nd	nd	9	263	47	1069	1095	1178	1797
k__Bacteria_p__Proteobacteria_c__Betaproteobacteria_o__A21b_f__EB1003_g___s__	0	0	0	0	0	0	0	0	0	7	0	0		0	0	nd	nd	nd	0	0	0	0	0	0	0
k__Bacteria_p__Proteobacteria_c__Betaproteobacteria_o__ASSO13_f___g___s__	0	0	160	0	0	0	0	0	0	0	0	0		0	0	nd	nd	nd	0	0	0	0	0	0	0
k__Bacteria_p__Proteobacteria_c__Betaproteobacteria_o__Burkholderiales____g___s__	0	0	0	0	0	13	0	0	0	0	0	0		0	0	nd	nd	nd	0	0	0	0	0	0	0
k__Bacteria_p__Proteobacteria_c__Betaproteobacteria_o__Burkholderiales___Comamonadaceae_g__Acidovorax_s__	0	0	184	0	0	0	0	0	0	0	0	0		0	0	nd	nd	nd	0	0	0	0	0	0	0
k__Bacteria_p__Proteobacteria_c__Betaproteobacteria_o__Burkholderiales_f___g___s__	0	0	117	32	15	228	485	190	1012	584	801	548		108	0	nd	nd	nd	26	0	11	87	530	180	355
k__Bacteria_p__Proteobacteria_c__Betaproteobacteria_o__Burkholderiales_f__Alcaligenaceae_g___s__	0	57	139	95	31	150	41	81	33	48	0	25		438	28	nd	nd	nd	29	8	46	183	219	210	259
k__Bacteria_p__Proteobacteria_c__Betaproteobacteria_o__Burkholderiales_f__Alcaligenaceae_g__Achromobacter_s__	0	0	0	0	0	0	8	2	0	0	0	0		8	0	nd	nd	nd	0	0	0	0	0	0	0
k__Bacteria_p__Proteobacteria_c__Betaproteobacteria_o__Burkholderiales_f__Alcaligenaceae_g__Alcaligenes_s__faecalis	0	0	8	0	0	0	12	0	0	0	0	0		0	0	nd	nd	nd	0	0	0	0	0	0	0
k__Bacteria_p__Proteobacteria_c__Betaproteobacteria_o__Burkholderiales_f__Alcaligenaceae_g__Pigmentiphaga_s__	0	0	0	0	0	0	0	0	52	17	76	32		0	0	nd	nd	nd	26	41	0	0	0	0	0
k__Bacteria_p__Proteobacteria_c__Betaproteobacteria_o__Burkholderiales_f__Alcaligenaceae_g__Sutterella_s__	0	10	0	0	18	6	31	0	70	2	13	39		0	0	nd	nd	nd	4	0	0	0	0	5	0
k__Bacteria_p__Proteobacteria_c__Betaproteobacteria_o__Burkholderiales_f__Burkholderiaceae_g__Burkholderia_NA	0	0	0	0	0	0	0	0	5	0	0	0		0	0	nd	nd	nd	0	0	0	0	0	0	0
k__Bacteria_p__Proteobacteria_c__Betaproteobacteria_o__Burkholderiales_f__Burkholderiaceae_g__Burkholderia_s__	0	0	0	3	16	0	28	0	0	9	0	0		0	0	nd	nd	nd	20	44	0	0	0	0	0
k__Bacteria_p__Proteobacteria_c__Betaproteobacteria_o__Burkholderiales_f__Burkholderiaceae_g__Burkholderia_s__andropogonis	0	0	0	0	19	0	0	0	21	0	0	42		0	0	nd	nd	nd	0	0	0	14	0	0	0
k__Bacteria_p__Proteobacteria_c__Betaproteobacteria_o__Burkholderiales_f__Burkholderiaceae_g__Burkholderia_s__bryophila	0	0	0	0	0	0	7	0	0	0	0	0		0	0	nd	nd	nd	0	0	0	19	0	0	0
k__Bacteria_p__Proteobacteria_c__Betaproteobacteria_o__Burkholderiales_f__Burkholderiaceae_g__CandidatusGlomeribacter_s__gigasporarum	0	0	0	0	0	0	0	0	0	0	0	0		0	0	nd	nd	nd	0	0	0	0	0	0	0
k__Bacteria_p__Proteobacteria_c__Betaproteobacteria_o__Burkholderiales_f__Comamonadaceae_g___s__	65	318	134	540	687	779	1638	159	2152	848	662	1292		296	82	nd	nd	nd	56	21	0	0	175	658	1819
k__Bacteria_p__Proteobacteria_c__Betaproteobacteria_o__Burkholderiales_f__Comamonadaceae_g__Acidovorax_s__	0	0	0	79	0	34	0	0	0	0	0	0		0	29	nd	nd	nd	1400	563	0	0	0	0	0
k__Bacteria_p__Proteobacteria_c__Betaproteobacteria_o__Burkholderiales_f__Comamonadaceae_g__Aquabacterium_s__	0	13	0	0	0	23	217	0	0	30	0	197		0	0	nd	nd	nd	0	0	0	0	0	27	23
k__Bacteria_p__Proteobacteria_c__Betaproteobacteria_o__Burkholderiales_f__Comamonadaceae_g__Comamonas_s__	0	0	0	108	0	0	0	0	0	0	0	0		0	82	nd	nd	nd	0	0	0	0	0	0	0
k__Bacteria_p__Proteobacteria_c__Betaproteobacteria_o__Burkholderiales_f__Comamonadaceae_g__Curvibacter_s__	0	0	0	0	25	0	0	0	0	0	0	0		0	0	nd	nd	nd	0	0	0	0	0	0	0
k__Bacteria_p__Proteobacteria_c__Betaproteobacteria_o__Burkholderiales_f__Comamonadaceae_g__Delftia_s__	0	393	0	957	74	483	293	99	33	84	0	0		0	73	nd	nd	nd	0	607	11	1040	89	222	0
k__Bacteria_p__Proteobacteria_c__Betaproteobacteria_o__Burkholderiales_f__Comamonadaceae_g__Diaphorobacter_s__	0	0	0	1667	0	0	26	0	0	0	0	0		0	0	nd	nd	nd	0	0	0	0	0	0	0
k__Bacteria_p__Proteobacteria_c__Betaproteobacteria_o__Burkholderiales_f__Comamonadaceae_g__Giesbergeria_s__	0	28	75	0	0	0	0	0	0	0	34	42		0	0	nd	nd	nd	0	0	0	0	0	0	0
k__Bacteria_p__Proteobacteria_c__Betaproteobacteria_o__Burkholderiales_f__Comamonadaceae_g__Hydrogenophaga_s__	0	1061	347	474	986	1907	1579	293	1435	1946	600	1575		81	489	nd	nd	nd	48	150	202	47	0	51	548
k__Bacteria_p__Proteobacteria_c__Betaproteobacteria_o__Burkholderiales_f__Comamonadaceae_g__Hylemonella_s__	0	351	275	278	24	0	65	74	92	42	11	977		0	0	nd	nd	nd	0	0	0	47	0	0	0
k__Bacteria_p__Proteobacteria_c__Betaproteobacteria_o__Burkholderiales_f__Comamonadaceae_g__Hylemonella_s__gracilis	0	0	0	0	0	0	0	0	25	0	0	0		0	0	nd	nd	nd	0	0	0	0	0	0	0
k__Bacteria_p__Proteobacteria_c__Betaproteobacteria_o__Burkholderiales_f__Comamonadaceae_g__Leptothrix_s__	0	24	35	0	397	480	239	86	154	79	100	349		306	296	nd	nd	nd	541	27	39	39	40	0	69
k__Bacteria_p__Proteobacteria_c__Betaproteobacteria_o__Burkholderiales_f__Comamonadaceae_g__Leptothrix_s__ochracea	0	0	0	0	0	0	0	0	0	0	3	0		0	0	nd	nd	nd	0	0	0	0	0	0	0
k__Bacteria_p__Proteobacteria_c__Betaproteobacteria_o__Burkholderiales_f__Comamonadaceae_g__Limnobacter_s__	0	22	0	0	0	0	0	0	84	25	0	63		0	0	nd	nd	nd	0	0	0	187	0	19	0
k__Bacteria_p__Proteobacteria_c__Betaproteobacteria_o__Burkholderiales_f__Comamonadaceae_g__Limnohabitans_NA	0	407	0	130	251	93	0	0	0	0	0	0		0	0	nd	nd	nd	0	0	0	0	0	0	0
k__Bacteria_p__Proteobacteria_c__Betaproteobacteria_o__Burkholderiales_f__Comamonadaceae_g__Limnohabitans_s__	20	10372	3027	8066	9884	10309	1877	642	1490	491	2868	6168		0	0	nd	nd	nd	377	84	0	101	0	0	0
k__Bacteria_p__Proteobacteria_c__Betaproteobacteria_o__Burkholderiales_f__Comamonadaceae_g__Methylibium_NA	0	0	0	0	0	0	0	0	0	0	0	0		0	0	nd	nd	nd	0	0	0	0	0	0	0
k__Bacteria_p__Proteobacteria_c__Betaproteobacteria_o__Burkholderiales_f__Comamonadaceae_g__Methylibium_s__	0	111	0	69	147	809	402	194	684	449	221	638		1953	181	nd	nd	nd	758	241	41	427	423	336	1212
k__Bacteria_p__Proteobacteria_c__Betaproteobacteria_o__Burkholderiales_f__Comamonadaceae_g__Paucibacter_s__	0	497	283	360	180	293	355	188	622	334	408	1082		267	590	nd	nd	nd	361	0	672	132	0	47	292
k__Bacteria_p__Proteobacteria_c__Betaproteobacteria_o__Burkholderiales_f__Comamonadaceae_g__Polaromonas_s__	0	0	318	20	198	1108	5840	242	1465	697	506	1704		47	230	nd	nd	nd	2880	827	22	161	57	259	339
k__Bacteria_p__Proteobacteria_c__Betaproteobacteria_o__Burkholderiales_f__Comamonadaceae_g__Ramlibacter_s__	0	0	0	0	0	0	0	0	0	29	0	0		0	0	nd	nd	nd	0	0	0	0	0	0	0
k__Bacteria_p__Proteobacteria_c__Betaproteobacteria_o__Burkholderiales_f__Comamonadaceae_g__Rhodoferax_s__	0	2684	827	4313	6883	15569	4916	1142	9248	4996	2545	8907		489	1095	nd	nd	nd	3427	1452	126	246	1304	872	3222
k__Bacteria_p__Proteobacteria_c__Betaproteobacteria_o__Burkholderiales_f__Comamonadaceae_g__Rubrivivax_s__	69	202	59	95	528	546	476	71	228	192	238	1757		362	0	nd	nd	nd	0	37	35	69	8	233	664
k__Bacteria_p__Proteobacteria_c__Betaproteobacteria_o__Burkholderiales_f__Comamonadaceae_g__Rubrivivax_s__gelatinosus	0	17	0	0	0	0	98	0	47	24	0	78		0	0	nd	nd	nd	0	36	0	0	0	35	0
k__Bacteria_p__Proteobacteria_c__Betaproteobacteria_o__Burkholderiales_f__Comamonadaceae_g__Simplicispira_s__	0	0	0	0	0	0	0	0	0	0	0	0		0	0	nd	nd	nd	0	0	0	0	0	0	0
k__Bacteria_p__Proteobacteria_c__Betaproteobacteria_o__Burkholderiales_f__Comamonadaceae_g__Variovorax_s__	0	48	77	467	403	73	0	0	0	0	0	0		16	0	nd	nd	nd	71	134	0	0	0	0	0
k__Bacteria_p__Proteobacteria_c__Betaproteobacteria_o__Burkholderiales_f__Comamonadaceae_g__Variovorax_s__paradoxus	0	24	0	368	74	106	0	6	70	21	0	0		29	0	nd	nd	nd	0	39	0	530	0	70	0
k__Bacteria_p__Proteobacteria_c__Betaproteobacteria_o__Burkholderiales_f__Comamonadaceae_g__Verminephrobacter_s__	0	0	0	0	0	10	0	0	0	0	0	0		0	0	nd	nd	nd	0	0	0	0	0	0	0
k__Bacteria_p__Proteobacteria_c__Betaproteobacteria_o__Burkholderiales_f__Comamonadaceae_NA_NA	126	17045	1942	12376	16683	18935	4954	986	4525	3605	13010	20673		1817	852	nd	nd	nd	4420	1091	130	1088	766	1052	2767
k__Bacteria_p__Proteobacteria_c__Betaproteobacteria_o__Burkholderiales_f__Oxalobacteraceae_g___s__	19	291	215	307	399	1061	731	141	742	637	819	1510		102	53	nd	nd	nd	312	48	0	145	63	165	346
k__Bacteria_p__Proteobacteria_c__Betaproteobacteria_o__Burkholderiales_f__Oxalobacteraceae_g__Collimonas_s__	0	0	0	0	20	0	15	0	0	0	0	0		9	0	nd	nd	nd	0	0	0	0	0	0	0
k__Bacteria_p__Proteobacteria_c__Betaproteobacteria_o__Burkholderiales_f__Oxalobacteraceae_g__Cupriavidus_s__	0	131	29	1949	178	2893	467	131	74	160	14	0		0	0	nd	nd	nd	216	2006	55	2463	12	232	0
k__Bacteria_p__Proteobacteria_c__Betaproteobacteria_o__Burkholderiales_f__Oxalobacteraceae_g__Herminiimonas_s__	7	23	62	0	0	16	178	0	233	89	84	158		0	0	nd	nd	nd	0	13	0	0	0	27	2
k__Bacteria_p__Proteobacteria_c__Betaproteobacteria_o__Burkholderiales_f__Oxalobacteraceae_g__Janthinobacterium_s__	16	223	428	52	308	501	689	334	1807	1335	605	3965		144	117	nd	nd	nd	4578	6704	60	1334	218	342	615
k__Bacteria_p__Proteobacteria_c__Betaproteobacteria_o__Burkholderiales_f__Oxalobacteraceae_g__Janthinobacterium_s__lividum	0	0	60	0	0	39	79	8	176	88	63	176		59	0	nd	nd	nd	0	263	25	145	11	45	38
k__Bacteria_p__Proteobacteria_c__Betaproteobacteria_o__Burkholderiales_f__Oxalobacteraceae_g__Oxalobacter_s__	0	0	0	0	0	0	0	0	43	0	0	0		0	0	nd	nd	nd	0	0	0	0	0	0	0
k__Bacteria_p__Proteobacteria_c__Betaproteobacteria_o__Burkholderiales_f__Oxalobacteraceae_g__Polynucleobacter_s__	0	640	205	284	821	913	377	0	198	213	221	798		0	0	nd	nd	nd	0	0	0	0	0	0	0
k__Bacteria_p__Proteobacteria_c__Betaproteobacteria_o__Burkholderiales_f__Oxalobacteraceae_g__Polynucleobacter_s__cosmopolitanus	0	977	651	704	358	505	0	0	0	0	0	463		0	0	nd	nd	nd	0	0	0	0	0	0	0
k__Bacteria_p__Proteobacteria_c__Betaproteobacteria_o__Burkholderiales_f__Oxalobacteraceae_g__Ralstonia_s__	0	13	0	0	0	11	148	0	0	10	0	0		0	0	nd	nd	nd	0	27	0	93	0	0	0
k__Bacteria_p__Proteobacteria_c__Betaproteobacteria_o__Burkholderiales_f__Oxalobacteraceae_NA_NA	0	53	226	29	27	86	357	0	1026	340	156	356		59	46	nd	nd	nd	37	110	30	0	80	0	46
k__Bacteria_p__Proteobacteria_c__Betaproteobacteria_o__Burkholderiales_NA_NA_NA	0	11	0	0	64	243	292	153	554	362	173	275		85	0	nd	nd	nd	257	0	61	65	49	193	165
k__Bacteria_p__Proteobacteria_c__Betaproteobacteria_o__Ellin6067_f___g___s__	0	6	60	21	87	104	70	93	281	361	104	74		440	53	nd	nd	nd	0	40	166	429	323	319	589
k__Bacteria_p__Proteobacteria_c__Betaproteobacteria_o__Gallionellales_f__Gallionellaceae_g___s__	0	0	0	0	10	0	0	0	0	0	0	0		0	0	nd	nd	nd	0	0	0	0	0	0	0
k__Bacteria_p__Proteobacteria_c__Betaproteobacteria_o__Gallionellales_f__Gallionellaceae_g__Gallionella_s__	0	0	0	0	14	11	62	11	58	37	0	0		0	0	nd	nd	nd	0	0	0	0	0	0	0
k__Bacteria_p__Proteobacteria_c__Betaproteobacteria_o__Hydrogenophilales_f__Hydrogenophilaceae_g__Thiobacillus_s__	0	0	0	0	15	0	17	0	0	0	0	0		0	0	nd	nd	nd	0	0	0	0	0	0	0
k__Bacteria_p__Proteobacteria_c__Betaproteobacteria_o__IS44_f___g___s__	0	0	0	0	0	0	118	0	34	101	0	62		27	0	nd	nd	nd	0	0	0	0	0	0	0
k__Bacteria_p__Proteobacteria_c__Betaproteobacteria_o__Methylophilales_f___g___s__	0	0	0	4	0	6	9	0	88	13	0	0		0	0	nd	nd	nd	0	0	0	0	0	0	0
k__Bacteria_p__Proteobacteria_c__Betaproteobacteria_o__Methylophilales_f__Methylophilaceae_g___s__	0	432	39	266	657	451	247	0	401	190	224	955		0	0	nd	nd	nd	11	16	0	9	0	0	97
k__Bacteria_p__Proteobacteria_c__Betaproteobacteria_o__Methylophilales_f__Methylophilaceae_g__Methylotenera_s__mobilis	0	364	414	118	505	485	612	147	411	430	568	1693		458	25	nd	nd	nd	109	134	82	107	177	307	3216
k__Bacteria_p__Proteobacteria_c__Betaproteobacteria_o__Methylophilales_NA_NA_NA	0	32	0	0	0	0	0	20	39	0	0	30		0	0	nd	nd	nd	0	0	0	0	0	0	0
k__Bacteria_p__Proteobacteria_c__Betaproteobacteria_o__MND1_f___g___s__	14	12	1267	17	244	167	247	268	340	521	139	264		916	62	nd	nd	nd	0	229	19	698	557	954	903
k__Bacteria_p__Proteobacteria_c__Betaproteobacteria_o__Neisseriales_f__Neisseriaceae_g__Andreprevotia_s__chitinilytica	0	0	0	0	0	32	111	8	822	678	415	307		54	25	nd	nd	nd	0	0	0	46	16	80	366
k__Bacteria_p__Proteobacteria_c__Betaproteobacteria_o__Neisseriales_f__Neisseriaceae_g__Aquaspirillum_s__putridiconchylium	0	39	0	0	0	5	0	0	0	2	21	116		0	0	nd	nd	nd	0	0	0	0	0	0	0
k__Bacteria_p__Proteobacteria_c__Betaproteobacteria_o__Neisseriales_f__Neisseriaceae_g__Chitinibacter_s__tainanensis	0	0	0	8	45	17	0	4	7	0	0	77		0	0	nd	nd	nd	0	0	0	0	7	0	0
k__Bacteria_p__Proteobacteria_c__Betaproteobacteria_o__Neisseriales_f__Neisseriaceae_g__Chitinimonas_NA	0	0	0	0	0	0	0	0	0	0	0	0		0	0	nd	nd	nd	0	0	0	0	0	0	0
k__Bacteria_p__Proteobacteria_c__Betaproteobacteria_o__Neisseriales_f__Neisseriaceae_g__Chitinimonas_s__taiwanensis	0	16	0	56	16	0	0	118	0	0	0	0		82	61	nd	nd	nd	0	0	0	0	0	0	0
k__Bacteria_p__Proteobacteria_c__Betaproteobacteria_o__Neisseriales_f__Neisseriaceae_g__Chromobacterium_s__	0	54	56	48	57	25	0	0	0	15	76	306		0	0	nd	nd	nd	213	83	0	0	0	0	0
k__Bacteria_p__Proteobacteria_c__Betaproteobacteria_o__Neisseriales_f__Neisseriaceae_g__Deefgea_s__	7	38	43	58	20	27	43	0	113	100	67	155		99	0	nd	nd	nd	4	0	0	6	0	80	61
k__Bacteria_p__Proteobacteria_c__Betaproteobacteria_o__Neisseriales_f__Neisseriaceae_g__Elbe_s__Iso18	0	0	0	69	0	0	0	0	33	27	17	0		0	255	nd	nd	nd	54	0	0	0	0	0	0
k__Bacteria_p__Proteobacteria_c__Betaproteobacteria_o__Neisseriales_f__Neisseriaceae_g__Formivibrio_s__citricus	0	0	0	0	20	127	211	6	0	0	14	79		0	0	nd	nd	nd	0	0	0	0	0	0	0
k__Bacteria_p__Proteobacteria_c__Betaproteobacteria_o__Neisseriales_f__Neisseriaceae_g__Microvirgula_s__	0	0	42	0	0	0	0	0	0	0	0	0		0	0	nd	nd	nd	0	0	0	0	0	0	0
k__Bacteria_p__Proteobacteria_c__Betaproteobacteria_o__Neisseriales_f__Neisseriaceae_g__Vitreoscilla_s__	0	0	0	0	0	0	0	0	4	0	0	0		31	0	nd	nd	nd	0	0	0	0	0	0	0
k__Bacteria_p__Proteobacteria_c__Betaproteobacteria_o__Neisseriales_f__Neisseriaceae_g__Vogesella_s__	0	270	115	6531	36	26	19	9	0	0	0	394		4	1057	nd	nd	nd	13	0	0	0	0	0	0
k__Bacteria_p__Proteobacteria_c__Betaproteobacteria_o__Neisseriales_f__Neisseriaceae_NA_NA	29	12	0	0	0	7	0	0	864	208	16	11		123	7	nd	nd	nd	48	22	0	7	28	53	25
k__Bacteria_p__Proteobacteria_c__Betaproteobacteria_o__Nitrosomonadales_f___g___s__	0	3	0	0	0	17	9	0	0	21	0	0		0	0	nd	nd	nd	0	0	0	0	0	0	0
k__Bacteria_p__Proteobacteria_c__Betaproteobacteria_o__Nitrosomonadales_f__Nitrosomonadaceae_g___s__	0	0	0	0	0	0	0	0	0	38	0	0		0	0	nd	nd	nd	0	0	0	0	0	0	0
k__Bacteria_p__Proteobacteria_c__Betaproteobacteria_o__Procabacteriales_f___g___s__	0	0	0	0	0	0	0	0	0	0	0	0		0	0	nd	nd	nd	0	0	0	0	0	0	0
k__Bacteria_p__Proteobacteria_c__Betaproteobacteria_o__Procabacteriales_f__Procabacteriaceae_g___s__	72	31	7	6	42	54	154	181	22	126	101	150		880	423	nd	nd	nd	16	88	0	15	30	139	736
k__Bacteria_p__Proteobacteria_c__Betaproteobacteria_o__Rhodocyclales_f___Rhodocyclaceae_g__Dechloromonas	0	0	0	0	9	0	0	0	0	0	0	0		0	0	nd	nd	nd	0	0	0	0	0	0	0
k__Bacteria_p__Proteobacteria_c__Betaproteobacteria_o__Rhodocyclales_f___Rhodocyclaceae_g__Dok59	0	0	0	0	0	26	0	0	0	0	0	0		0	0	nd	nd	nd	0	0	0	0	0	0	0
k__Bacteria_p__Proteobacteria_c__Betaproteobacteria_o__Rhodocyclales_f___Rhodocyclaceae_NA	0	0	0	0	29	0	0	0	0	0	0	0		0	0	nd	nd	nd	0	0	0	0	0	0	0
k__Bacteria_p__Proteobacteria_c__Betaproteobacteria_o__Rhodocyclales_f__Rhodocyclaceae_g___s__	0	0	0	22	0	0	0	0	0	0	0	0		0	0	nd	nd	nd	0	0	0	0	0	0	0
k__Bacteria_p__Proteobacteria_c__Betaproteobacteria_o__Rhodocyclales_f__Rhodocyclaceae_g__Azoarcus_s__	0	0	0	19	0	0	24	0	0	26	0	41		0	0	nd	nd	nd	0	0	0	0	0	0	0
k__Bacteria_p__Proteobacteria_c__Betaproteobacteria_o__Rhodocyclales_f__Rhodocyclaceae_g__Azovibrio_s__	0	0	0	0	0	0	0	0	0	25	0	0		0	0	nd	nd	nd	0	0	0	0	0	0	0
k__Bacteria_p__Proteobacteria_c__Betaproteobacteria_o__Rhodocyclales_f__Rhodocyclaceae_g__C39_s__	0	1314	117	0	254	237	10	0	0	0	0	271		0	0	nd	nd	nd	0	0	0	0	0	0	0
k__Bacteria_p__Proteobacteria_c__Betaproteobacteria_o__Rhodocyclales_f__Rhodocyclaceae_g__CandidatusAccumulibacter_s__	0	0	0	0	0	0	0	0	39	34	0	0		0	0	nd	nd	nd	0	0	0	0	0	0	0
k__Bacteria_p__Proteobacteria_c__Betaproteobacteria_o__Rhodocyclales_f__Rhodocyclaceae_g__Dechloromonas_NA	0	0	0	0	0	0	23	0	0	0	0	0		0	0	nd	nd	nd	0	0	0	0	0	0	0
k__Bacteria_p__Proteobacteria_c__Betaproteobacteria_o__Rhodocyclales_f__Rhodocyclaceae_g__Dechloromonas_s__	0	29	16	0	82	212	90	0	127	184	79	411		31	0	nd	nd	nd	0	0	0	0	0	0	0
k__Bacteria_p__Proteobacteria_c__Betaproteobacteria_o__Rhodocyclales_f__Rhodocyclaceae_g__Dok59_s__	0	0	0	0	0	24	43	0	0	16	0	0		0	0	nd	nd	nd	0	0	0	14	15	0	0
k__Bacteria_p__Proteobacteria_c__Betaproteobacteria_o__Rhodocyclales_f__Rhodocyclaceae_g__Hydrogenophilus_s__	0	0	6	0	0	0	0	0	0	0	0	0		0	0	nd	nd	nd	0	0	0	0	0	0	0
k__Bacteria_p__Proteobacteria_c__Betaproteobacteria_o__Rhodocyclales_f__Rhodocyclaceae_g__K82_s__	0	0	0	0	0	0	0	0	12	0	0	0		0	0	nd	nd	nd	0	0	0	0	0	0	0
k__Bacteria_p__Proteobacteria_c__Betaproteobacteria_o__Rhodocyclales_f__Rhodocyclaceae_g__Propionivibrio_s__	0	0	13	0	15	54	181	0	37	31	36	52		35	0	nd	nd	nd	0	0	0	19	0	0	0
k__Bacteria_p__Proteobacteria_c__Betaproteobacteria_o__Rhodocyclales_f__Rhodocyclaceae_g__Sterolibacterium_s__	0	0	0	0	0	0	0	0	0	75	0	0		0	0	nd	nd	nd	0	0	0	0	0	0	0
k__Bacteria_p__Proteobacteria_c__Betaproteobacteria_o__Rhodocyclales_f__Rhodocyclaceae_g__Sulfuritalea_s__	0	0	0	0	44	56	59	59	21	61	57	51		0	0	nd	nd	nd	0	0	0	0	0	0	0
k__Bacteria_p__Proteobacteria_c__Betaproteobacteria_o__Rhodocyclales_f__Rhodocyclaceae_g__Thauera_s__	0	0	0	0	0	0	0	0	15	0	0	0		0	0	nd	nd	nd	0	0	0	0	0	0	0
k__Bacteria_p__Proteobacteria_c__Betaproteobacteria_o__Rhodocyclales_f__Rhodocyclaceae_g__TS34_s__	0	0	0	0	0	0	0	0	0	0	0	0		0	0	nd	nd	nd	0	0	0	0	0	0	0
k__Bacteria_p__Proteobacteria_c__Betaproteobacteria_o__Rhodocyclales_f__Rhodocyclaceae_g__Uliginosibacterium_s__	0	68	62	0	62	151	163	33	399	358	69	196		29	0	nd	nd	nd	0	0	0	67	163	141	162
k__Bacteria_p__Proteobacteria_c__Betaproteobacteria_o__Rhodocyclales_f__Rhodocyclaceae_g__Zoogloea_s__	0	13	0	13	28	0	0	62	0	0	0	0		0	0	nd	nd	nd	0	0	0	0	0	0	0
k__Bacteria_p__Proteobacteria_c__Betaproteobacteria_o__Rhodocyclales_f__Rhodocyclaceae_NA_NA	0	36	0	0	96	106	0	14	107	128	51	101		28	35	nd	nd	nd	0	26	0	42	50	13	67
k__Bacteria_p__Proteobacteria_c__Betaproteobacteria_o__SBla14_f___g___s__	0	0	0	0	58	0	55	0	45	268	120	0		0	0	nd	nd	nd	0	0	0	27	31	0	166
k__Bacteria_p__Proteobacteria_c__Betaproteobacteria_o__SCI84_f___g___s__	19	0	40	0	11	33	94	66	59	396	33	0		160	0	nd	nd	nd	0	0	0	0	0	0	0
k__Bacteria_p__Proteobacteria_c__Betaproteobacteria_o__Thiobacterales_f___g___s__	0	6	0	0	68	23	87	0	79	21	14	10		0	0	nd	nd	nd	0	0	0	0	0	0	0
k__Bacteria_p__Proteobacteria_c__Betaproteobacteria_o__Thiobacterales_f__Thiobacteraceae_g___s__	0	0	0	0	0	0	0	0	0	40	0	0		0	0	nd	nd	nd	0	0	0	0	0	0	0
k__Bacteria_p__Proteobacteria_c__Betaproteobacteria_o__Thiobacterales_NA_NA_NA	0	0	0	0	0	0	0	0	13	9	0	0		0	0	nd	nd	nd	0	0	0	0	0	0	0
k__Bacteria_p__Proteobacteria_c__Betaproteobacteria_o__Tremblayales_f___g___s__	0	6	0	0	0	7	2	0	0	0	0	0		0	0	nd	nd	nd	0	0	0	0	0	0	0
k__Bacteria_p__Proteobacteria_c__Deltaproteobacteria_NA_NA_NA_NA	160	55	185	68	86	99	165	79	145	180	19	24		792	229	nd	nd	nd	14	131	9	96	97	151	110
k__Bacteria_p__Proteobacteria_c__Deltaproteobacteria_o___f___g___s__	46	36	115	8	42	32	88	81	69	250	11	7		48	52	nd	nd	nd	13	61	0	54	18	73	13
k__Bacteria_p__Proteobacteria_c__Deltaproteobacteria_o__[Entotheonellales]_f___g___s__	0	0	0	0	0	2	22	0	46	49	18	0		0	0	nd	nd	nd	0	0	0	3	0	0	0
k__Bacteria_p__Proteobacteria_c__Deltaproteobacteria_o__[Entotheonellales]_f__[Entotheonellaceae]_g___s__	0	0	10	10	0	0	0	33	33	33	0	0		21	10	nd	nd	nd	0	34	0	47	91	130	0
k__Bacteria_p__Proteobacteria_c__Deltaproteobacteria_o__Bdellovibrionale_f__Bdellovibrionaceae_g__Bdellovibrio_s__	0	0	0	0	0	0	0	0	0	0	0	0		0	0	nd	nd	nd	0	0	0	0	0	0	0
k__Bacteria_p__Proteobacteria_c__Deltaproteobacteria_o__Bdellovibrionale_s_f__Bdellovibrionaceae_g__Bdellovibrio	0	0	0	0	11	0	0	0	0	0	0	0		0	0	nd	nd	nd	0	0	0	0	0	0	0
k__Bacteria_p__Proteobacteria_c__Deltaproteobacteria_o__Bdellovibrionales_f___g___s__	0	0	0	0	0	0	0	0	0	25	0	0		0	0	nd	nd	nd	0	0	0	0	0	0	0
k__Bacteria_p__Proteobacteria_c__Deltaproteobacteria_o__Bdellovibrionales_f__Bacteriovoracaceae_g___s__	18	144	174	15	24	204	260	282	114	174	142	236		521	256	nd	nd	nd	5	192	64	144	191	437	255
k__Bacteria_p__Proteobacteria_c__Deltaproteobacteria_o__Bdellovibrionales_f__Bacteriovoracaceae_g__Bacteriovorax_s__	0	13	38	0	0	6	3	0	0	0	0	4		0	0	nd	nd	nd	3	0	0	11	85	31	0
k__Bacteria_p__Proteobacteria_c__Deltaproteobacteria_o__Bdellovibrionales_f__Bacteriovoracaceae_g__Peredibacter_s__starrii	0	0	18	15	52	71	53	9	0	66	45	95		102	0	nd	nd	nd	65	128	271	183	300	172	60
k__Bacteria_p__Proteobacteria_c__Deltaproteobacteria_o__Bdellovibrionales_f__Bacteriovoracaceae_NA_NA	0	0	0	0	0	29	0	0	0	0	0	0		245	116	nd	nd	nd	0	0	0	0	32	18	0
k__Bacteria_p__Proteobacteria_c__Deltaproteobacteria_o__Bdellovibrionales_f__Bdellovibrionaceae_g___s__	0	0	0	0	16	4	5	0	0	0	0	0		0	16	nd	nd	nd	5	0	0	0	4	4	0
k__Bacteria_p__Proteobacteria_c__Deltaproteobacteria_o__Bdellovibrionales_f__Bdellovibrionaceae_g__Bdellovibrio_NA	0	0	0	0	0	0	19	0	0	0	0	0		6	0	nd	nd	nd	0	0	0	0	8	0	0
k__Bacteria_p__Proteobacteria_c__Deltaproteobacteria_o__Bdellovibrionales_f__Bdellovibrionaceae_g__Bdellovibrio_s__	43	218	392	69	207	253	511	83	229	518	114	111		424	489	nd	nd	nd	22	255	0	126	309	276	421
k__Bacteria_p__Proteobacteria_c__Deltaproteobacteria_o__Bdellovibrionales_f__Bdellovibrionaceae_g__Bdellovibrio_s__bacteriovorus	0	3	300	0	16	34	16	0	0	23	0	4		0	0	nd	nd	nd	5	24	0	0	49	0	0
k__Bacteria_p__Proteobacteria_c__Deltaproteobacteria_o__BPC076_f___g___s__	0	0	0	0	0	0	7	0	0	6	0	0		0	0	nd	nd	nd	0	0	0	0	0	0	0
k__Bacteria_p__Proteobacteria_c__Deltaproteobacteria_o__Desulfarculales_f__Desulfarculaceae_g___s__	0	0	0	0	0	0	40	0	0	39	7	0		0	0	nd	nd	nd	0	0	0	0	0	0	0
k__Bacteria_p__Proteobacteria_c__Deltaproteobacteria_o__Desulfarculales_f__Desulfarculaceae_g__Desulfarculus_s__	0	0	0	8	0	0	0	0	0	0	0	0		0	0	nd	nd	nd	0	0	0	0	0	0	0
k__Bacteria_p__Proteobacteria_c__Deltaproteobacteria_o__Desulfobacterales_f__Desulfobacteraceae_g___s__	0	0	0	0	0	0	2	0	2	40	0	0		0	0	nd	nd	nd	0	0	0	0	0	0	0
k__Bacteria_p__Proteobacteria_c__Deltaproteobacteria_o__Desulfobacterales_f__Desulfobacteraceae_g__Desulfobotulus_s__alkaliphilus	0	0	0	3	0	0	0	0	26	0	4	0		0	0	nd	nd	nd	0	0	0	0	0	0	0
k__Bacteria_p__Proteobacteria_c__Deltaproteobacteria_o__Desulfobacterales_f__Desulfobacteraceae_g__Desulfococcus_s__	0	0	0	0	0	12	3	0	7	5	6	5		0	0	nd	nd	nd	0	0	0	0	0	0	0
k__Bacteria_p__Proteobacteria_c__Deltaproteobacteria_o__Desulfobacterales_f__Desulfobacteraceae_NA_NA	0	7	0	0	0	0	0	0	46	0	2	0		0	0	nd	nd	nd	0	0	0	0	0	0	0
k__Bacteria_p__Proteobacteria_c__Deltaproteobacteria_o__Desulfobacterales_f__Desulfobulbaceae_g___s__	0	6	0	0	15	0	17	0	78	73	7	20		0	0	nd	nd	nd	0	0	0	0	0	0	0
k__Bacteria_p__Proteobacteria_c__Deltaproteobacteria_o__Desulfobacterales_f__Desulfobulbaceae_g__Desulfobulbus_s__	0	0	0	0	10	11	16	0	10	0	9	10		0	0	nd	nd	nd	0	0	0	0	3	28	0
k__Bacteria_p__Proteobacteria_c__Deltaproteobacteria_o__Desulfobacterales_f__Desulfobulbaceae_NA_NA	0	0	0	0	0	0	0	0	0	8	0	0		0	0	nd	nd	nd	0	0	0	0	0	0	0
k__Bacteria_p__Proteobacteria_c__Deltaproteobacteria_o__Desulfovibrionales_f__Desulfovibrionaceae_g___s__	0	7	25	0	0	8	33	0	36	0	17	0		0	0	nd	nd	nd	0	0	0	0	0	0	0
k__Bacteria_p__Proteobacteria_c__Deltaproteobacteria_o__Desulfovibrionales_f__Desulfovibrionaceae_g__Desulfovibrio_s__	0	0	27	0	0	0	0	0	8	11	0	4		0	0	nd	nd	nd	0	0	0	0	0	0	0
k__Bacteria_p__Proteobacteria_c__Deltaproteobacteria_o__Desulfovibrionales_f__Desulfovibrionaceae_g__Desulfovibrio_s__cuneatus	0	0	0	0	4	0	0	0	0	5	5	0		0	0	nd	nd	nd	0	0	0	0	0	0	0
k__Bacteria_p__Proteobacteria_c__Deltaproteobacteria_o__Desulfovibrionales_f__Desulfovibrionaceae_g__Desulfovibrio_s__litoralis	0	0	0	0	0	0	2	0	4	11	5	11		13	0	nd	nd	nd	0	0	0	6	0	0	4
k__Bacteria_p__Proteobacteria_c__Deltaproteobacteria_o__Desulfovibrionales_f__Desulfovibrionaceae_g__Desulfovibrio_s__mexicanus	0	0	0	0	0	0	5	0	8	47	5	0		29	0	nd	nd	nd	0	0	0	0	0	0	0
k__Bacteria_p__Proteobacteria_c__Deltaproteobacteria_o__Desulfovibrionales_f__Desulfovibrionaceae_g__Desulfovibrio_s__putealis	0	0	0	0	0	0	0	0	0	0	10	0		0	5	nd	nd	nd	0	0	0	0	0	0	0
k__Bacteria_p__Proteobacteria_c__Deltaproteobacteria_o__Desulfuromonadales_f__Geobacteraceae_g___s__	0	0	0	0	0	0	30	0	9	17	7	0		0	0	nd	nd	nd	0	0	0	0	0	0	0
k__Bacteria_p__Proteobacteria_c__Deltaproteobacteria_o__Desulfuromonadales_f__Geobacteraceae_g__Geobacter_NA	0	0	0	0	0	0	0	0	0	0	0	0		0	0	nd	nd	nd	0	0	0	0	0	0	0
k__Bacteria_p__Proteobacteria_c__Deltaproteobacteria_o__Desulfuromonadales_f__Geobacteraceae_g__Geobacter_s__	0	49	34	0	190	111	274	0	589	351	57	413		7	0	nd	nd	nd	0	26	0	77	9	0	12
k__Bacteria_p__Proteobacteria_c__Deltaproteobacteria_o__Desulfuromonadales_f__Pelobacteraceae_g___s__	0	0	0	0	0	0	0	0	0	30	0	0		0	0	nd	nd	nd	0	0	0	0	0	0	0
k__Bacteria_p__Proteobacteria_c__Deltaproteobacteria_o__Desulfuromonadales_NA_NA_NA	0	0	0	0	0	0	11	0	0	16	0	0		0	0	nd	nd	nd	0	0	0	0	0	0	0
k__Bacteria_p__Proteobacteria_c__Deltaproteobacteria_o__DTB120_f___g___s__	0	0	0	0	0	0	0	0	39	0	0	0		0	0	nd	nd	nd	0	0	0	0	0	0	0
k__Bacteria_p__Proteobacteria_c__Deltaproteobacteria_o__FAC87_f___g___s__	34	20	54	8	83	30	24	53	47	79	11	4		316	204	nd	nd	nd	121	110	0	13	49	96	49
k__Bacteria_p__Proteobacteria_c__Deltaproteobacteria_o__GMD14H09_f___g___s__	0	0	0	15	0	0	0	0	0	0	0	0		0	0	nd	nd	nd	0	0	0	0	0	0	0
k__Bacteria_p__Proteobacteria_c__Deltaproteobacteria_o__GW28_f___g___s__	0	0	0	0	0	0	0	0	0	0	5	2		0	0	nd	nd	nd	0	0	0	0	0	0	0
k__Bacteria_p__Proteobacteria_c__Deltaproteobacteria_o__MBNT15_f___g___s__	0	0	0	0	11	0	14	0	80	117	8	25		0	0	nd	nd	nd	0	0	0	0	11	0	0
k__Bacteria_p__Proteobacteria_c__Deltaproteobacteria_o__MIZ46_f___g___s__	0	131	102	59	315	143	193	112	214	240	25	36		646	387	nd	nd	nd	22	160	4	146	125	285	222
k__Bacteria_p__Proteobacteria_c__Deltaproteobacteria_o__Myxococcales_f____0	0	0	0	0	0	0	0	0	0	0	0	0		0	0	nd	nd	nd	0	0	0	0	0	0	0
k__Bacteria_p__Proteobacteria_c__Deltaproteobacteria_o__Myxococcales_f___g___s__	246	151	633	350	1401	844	1612	1230	3122	3240	742	775		2563	1886	nd	nd	nd	491	1162	192	2584	2437	3985	3704
k__Bacteria_p__Proteobacteria_c__Deltaproteobacteria_o__Myxococcales_f__03196G20_g___s__	22	22	53	15	52	33	21	0	138	16	13	44		28	0	nd	nd	nd	0	0	0	0	0	0	0
k__Bacteria_p__Proteobacteria_c__Deltaproteobacteria_o__Myxococcales_f__Cystobacteraceae_g___s__	0	0	0	0	17	0	6	0	0	0	0	0		0	0	nd	nd	nd	0	0	0	0	0	0	0
k__Bacteria_p__Proteobacteria_c__Deltaproteobacteria_o__Myxococcales_f__Cystobacteraceae_g__Cystobacter_s__	0	0	4	0	0	0	0	0	0	0	6	0		0	0	nd	nd	nd	0	0	0	10	0	0	0
k__Bacteria_p__Proteobacteria_c__Deltaproteobacteria_o__Myxococcales_f__Cystobacterineae_g___s__	13	46	0	0	26	0	22	6	18	108	3	16		105	33	nd	nd	nd	5	22	0	16	12	8	36
k__Bacteria_p__Proteobacteria_c__Deltaproteobacteria_o__Myxococcales_f__Haliangiaceae_g___s__	22	0	137	11	70	84	329	281	112	486	46	136		233	154	nd	nd	nd	34	57	0	253	233	276	255
k__Bacteria_p__Proteobacteria_c__Deltaproteobacteria_o__Myxococcales_f__Haliangiaceae_NA_NA	0	0	0	0	0	0	0	0	0	7	0	0		0	0	nd	nd	nd	0	21	0	19	0	44	0
k__Bacteria_p__Proteobacteria_c__Deltaproteobacteria_o__Myxococcales_f__Myxococcaceae_g___s__	0	0	12	0	0	0	6	0	43	5	13	4		20	0	nd	nd	nd	0	0	0	13	11	30	4
k__Bacteria_p__Proteobacteria_c__Deltaproteobacteria_o__Myxococcales_f__Myxococcaceae_g__Anaeromyxobacter_s__	0	0	0	0	0	50	15	23	33	68	0	15		0	0	nd	nd	nd	0	0	0	0	0	0	0
k__Bacteria_p__Proteobacteria_c__Deltaproteobacteria_o__Myxococcales_f__Myxococcaceae_g__Corallococcus_s__exiguus	0	10	20	0	0	10	0	0	0	15	0	17		0	0	nd	nd	nd	37	0	0	53	0	0	72
k__Bacteria_p__Proteobacteria_c__Deltaproteobacteria_o__Myxococcales_f__Nannocystaceae_g__Nannocystis_s__	0	0	0	0	0	39	0	0	0	34	7	15		152	0	nd	nd	nd	0	0	0	47	50	42	30
k__Bacteria_p__Proteobacteria_c__Deltaproteobacteria_o__Myxococcales_f__Nannocystaceae_g__Nannocystis_s__exedens	0	0	0	0	5	3	0	0	0	0	0	0		0	0	nd	nd	nd	0	7	0	4	0	0	0
k__Bacteria_p__Proteobacteria_c__Deltaproteobacteria_o__Myxococcales_f__Nannocystaceae_g__Plesiocystis_s__	0	0	0	0	17	14	0	2	0	7	0	0		122	112	nd	nd	nd	5	14	0	87	24	78	112
k__Bacteria_p__Proteobacteria_c__Deltaproteobacteria_o__Myxococcales_f__Nannocystaceae_NA_NA	23	5	93	14	0	21	12	0	8	7	0	0		6	0	nd	nd	nd	0	0	0	0	5	27	63
k__Bacteria_p__Proteobacteria_c__Deltaproteobacteria_o__Myxococcales_f__OM27_g___s__	12	47	1037	14	19	31	15	35	81	104	9	9		155	14	nd	nd	nd	3	119	24	55	54	97	139
k__Bacteria_p__Proteobacteria_c__Deltaproteobacteria_o__Myxococcales_f__Polyangiaceae_g___s__	0	97	17	3	20	10	7	0	7	65	46	22		390	8	nd	nd	nd	0	29	0	50	42	187	152
k__Bacteria_p__Proteobacteria_c__Deltaproteobacteria_o__Myxococcales_f__Polyangiaceae_g__Aetherobacter_s__fasciculatus	0	0	0	0	0	0	100	0	3	321	22	0		0	0	nd	nd	nd	0	0	0	14	7	0	0
k__Bacteria_p__Proteobacteria_c__Deltaproteobacteria_o__Myxococcales_f__Polyangiaceae_g__Chondromyces_s__	0	17	0	0	0	0	14	0	0	7	4	0		0	0	nd	nd	nd	14	33	0	117	0	0	0
k__Bacteria_p__Proteobacteria_c__Deltaproteobacteria_o__Myxococcales_f__Polyangiaceae_NA_NA	0	0	9	0	0	3	0	0	473	28	28	0		22	9	nd	nd	nd	0	0	0	10	31	12	106
k__Bacteria_p__Proteobacteria_c__Deltaproteobacteria_o__Myxococcales_NA_NA_NA	75	82	88	19	28	51	168	0	79	238	128	43		385	131	nd	nd	nd	0	13	9	64	91	281	410
k__Bacteria_p__Proteobacteria_c__Deltaproteobacteria_o__NB1j_f___g___s__	0	30	27	0	7	4	35	103	88	149	9	0		197	0	nd	nd	nd	0	0	0	0	0	0	0
k__Bacteria_p__Proteobacteria_c__Deltaproteobacteria_o__NB1j_f__JTB38_g___s__	0	0	0	0	7	35	32	78	0	15	12	9		135	0	nd	nd	nd	0	0	0	0	0	0	0
k__Bacteria_p__Proteobacteria_c__Deltaproteobacteria_o__NB1j_f__MND4_g___s__	69	0	0	0	3	11	18	24	50	10	13	15		33	0	nd	nd	nd	0	0	0	0	0	0	0
k__Bacteria_p__Proteobacteria_c__Deltaproteobacteria_o__NB1j_f__NB1i_g___s__	0	0	0	0	0	15	0	72	0	70	0	15		145	0	nd	nd	nd	0	0	0	0	0	0	0
k__Bacteria_p__Proteobacteria_c__Deltaproteobacteria_o__NB1j_NA_NA_NA	0	0	0	0	0	0	0	0	0	0	0	0		0	0	nd	nd	nd	0	0	0	0	0	0	0
k__Bacteria_p__Proteobacteria_c__Deltaproteobacteria_o__PB19_f___g___s__	0	0	0	0	0	0	15	0	0	18	0	0		18	6	nd	nd	nd	104	0	0	12	0	35	0
k__Bacteria_p__Proteobacteria_c__Deltaproteobacteria_o__Spirobacillales_f___g___s__	4	209	408	53	201	220	449	303	332	349	178	168		1134	583	nd	nd	nd	189	509	44	69	239	276	244
k__Bacteria_p__Proteobacteria_c__Deltaproteobacteria_o__Sva0853_f___g___s__	0	0	0	0	0	0	0	0	0	0	5	0		0	0	nd	nd	nd	0	0	0	0	0	0	0
k__Bacteria_p__Proteobacteria_c__Deltaproteobacteria_o__Sva0853_f__JTB36_g___s__	0	0	0	0	0	0	0	0	5	0	0	0		0	0	nd	nd	nd	0	0	0	0	0	0	0
k__Bacteria_p__Proteobacteria_c__Deltaproteobacteria_o__Sva0853_NA_NA_NA	0	0	0	0	4	0	0	0	0	0	0	0		0	0	nd	nd	nd	0	20	0	0	0	0	0
k__Bacteria_p__Proteobacteria_c__Deltaproteobacteria_o__Syntrophobacterales_f__Syntrophaceae_g___s__	0	5	0	0	0	2	33	0	0	67	0	19		0	4	nd	nd	nd	0	0	0	0	5	0	0
k__Bacteria_p__Proteobacteria_c__Deltaproteobacteria_o__Syntrophobacterales_f__Syntrophaceae_g__Desulfobacca_s__	0	0	0	0	0	0	5	0	0	2	0	12		0	0	nd	nd	nd	0	0	0	0	3	0	0
k__Bacteria_p__Proteobacteria_c__Deltaproteobacteria_o__Syntrophobacterales_f__Syntrophaceae_g__Desulfomonile_s__	0	0	0	0	0	0	0	0	32	36	10	0		0	0	nd	nd	nd	0	0	0	0	0	0	0
k__Bacteria_p__Proteobacteria_c__Deltaproteobacteria_o__Syntrophobacterales_f__Syntrophaceae_g__Syntrophus_s__	0	0	0	0	0	0	0	0	14	17	8	0		0	0	nd	nd	nd	0	0	0	0	0	0	0
k__Bacteria_p__Proteobacteria_c__Deltaproteobacteria_o__Syntrophobacterales_f__Syntrophobacteraceae_g___s__	0	16	64	7	71	71	195	278	491	668	18	151		660	104	nd	nd	nd	0	35	38	521	665	636	708
k__Bacteria_p__Proteobacteria_c__Deltaproteobacteria_o__Syntrophobacterales_f__Syntrophobacteraceae_g__Desulfovirga_s__adipica	0	0	0	0	0	0	0	0	0	8	9	0		0	0	nd	nd	nd	0	0	0	0	0	0	0
k__Bacteria_p__Proteobacteria_c__Deltaproteobacteria_o__Syntrophobacterales_f__Syntrophobacteraceae_g__Syntrophobacter_s__	0	0	0	0	0	0	0	0	0	14	0	7		0	0	nd	nd	nd	0	0	0	0	0	0	0
k__Bacteria_p__Proteobacteria_c__Deltaproteobacteria_o__Syntrophobacterales_f__Syntrophobacteraceae_NA_NA	0	0	0	0	0	0	0	0	0	0	0	0		0	0	nd	nd	nd	0	0	0	0	0	0	0
k__Bacteria_p__Proteobacteria_c__Deltaproteobacteria_o__Syntrophobacterales_f__Syntrophorhabdaceae_g___s__	0	0	0	0	0	0	0	0	0	17	0	0		0	0	nd	nd	nd	0	0	0	0	0	0	0
k__Bacteria_p__Proteobacteria_c__Epsilonproteobacteria_o__Campylobacterales_f__Campylobacteraceae_g__Arcobacter_s__	0	0	0	0	68	27	224	14	92	88	56	96		0	0	nd	nd	nd	8	0	0	0	0	0	0
k__Bacteria_p__Proteobacteria_c__Epsilonproteobacteria_o__Campylobacterales_f__Campylobacteraceae_g__Arcobacter_s__cryaerophilus	0	0	34	0	0	38	0	0	0	22	0	0		0	0	nd	nd	nd	0	0	0	0	0	0	0
k__Bacteria_p__Proteobacteria_c__Epsilonproteobacteria_o__Campylobacterales_f__Campylobacteraceae_g__Campylobacter_NA	0	0	0	0	0	0	0	0	0	0	0	0		0	0	nd	nd	nd	0	0	0	0	0	0	0
k__Bacteria_p__Proteobacteria_c__Epsilonproteobacteria_o__Campylobacterales_f__Campylobacteraceae_g__Sulfurospirillum_s__	0	0	0	0	0	14	11	0	38	25	7	12		0	0	nd	nd	nd	0	0	0	0	0	0	0
k__Bacteria_p__Proteobacteria_c__Epsilonproteobacteria_o__Campylobacterales_f__Helicobacteraceae_g___s__	0	0	0	0	0	0	0	0	0	5	4	0		0	0	nd	nd	nd	0	0	0	0	0	0	0
k__Bacteria_p__Proteobacteria_c__Epsilonproteobacteria_o__Campylobacterales_f__Helicobacteraceae_g__Helicobacter_s__	0	0	15	0	0	0	0	0	0	0	0	0		0	0	nd	nd	nd	0	0	0	0	0	0	0
k__Bacteria_p__Proteobacteria_c__Epsilonproteobacteria_o__Campylobacterales_f__Helicobacteraceae_g__Sulfuricurvum_s__kujiense	0	0	0	0	72	14	135	40	248	68	13	92		0	0	nd	nd	nd	0	0	0	0	0	0	0
k__Bacteria_p__Proteobacteria_c__Epsilonproteobacteria_o__Campylobacterales_f__Helicobacteraceae_g__Sulfurimonas_s__	0	0	0	0	0	0	0	0	4	24	6	0		0	0	nd	nd	nd	0	0	0	0	0	0	0
k__Bacteria_p__Proteobacteria_c__Epsilonproteobacteria_o__Campylobacterales_f__Helicobacteraceae_NA_NA	0	0	0	0	2	0	0	0	0	0	0	0		0	0	nd	nd	nd	0	0	0	0	0	0	0
k__Bacteria_p__Proteobacteria_c__Gammaproteobacteria_NA_NA_NA_NA	26	22	177	254	152	146	174	43	344	270	161	302		280	206	nd	nd	nd	108	0	24	111	205	362	111
k__Bacteria_p__Proteobacteria_c__Gammaproteobacteria_o___f___g___s__	0	13	0	21	58	3	69	112	19	99	17	34		73	11	nd	nd	nd	0	13	0	64	25	107	80
k__Bacteria_p__Proteobacteria_c__Gammaproteobacteria_o__[Marinicellales]_f__[Marinicellaceae]_g___s__	0	0	0	0	7	10	0	72	0	23	2	7		77	0	nd	nd	nd	0	0	0	31	34	12	33
k__Bacteria_p__Proteobacteria_c__Gammaproteobacteria_o__34P16_f___g___s__	0	21	10	0	2	0	0	0	0	0	0	0		0	0	nd	nd	nd	0	0	0	0	0	0	0
k__Bacteria_p__Proteobacteria_c__Gammaproteobacteria_o__Aeromonadales_f__Aeromonadaceae_g___s__	0	2257	751	2491	283	710	543	777	711	549	1854	1200		2074	1696	nd	nd	nd	153	21	77	10	44	220	509
k__Bacteria_p__Proteobacteria_c__Gammaproteobacteria_o__Aeromonadales_f__Aeromonadaceae_g__Aeromonas_s__caviae	0	0	0	0	0	12	0	0	0	0	0	0		0	0	nd	nd	nd	0	0	0	0	0	0	0
k__Bacteria_p__Proteobacteria_c__Gammaproteobacteria_o__Aeromonadales_f__Aeromonadaceae_g__Tolumonas_s__	0	11	0	0	167	0	143	102	24	49	0	150		0	0	nd	nd	nd	36	0	0	0	0	0	0
k__Bacteria_p__Proteobacteria_c__Gammaproteobacteria_o__Aeromonadales_f__Aeromonadaceae_NA_NA	0	0	0	0	15	0	0	21	0	0	0	0		0	0	nd	nd	nd	0	0	0	0	0	0	0
k__Bacteria_p__Proteobacteria_c__Gammaproteobacteria_o__Alteromonadales_f___g___s__	0	0	0	0	0	0	0	0	0	14	0	11		0	14	nd	nd	nd	0	0	0	0	0	0	0
k__Bacteria_p__Proteobacteria_c__Gammaproteobacteria_o__Alteromonadales_f__[Chromatiaceae]_g__Rheinheimera_s__	0	171	44	634	179	288	0	0	0	52	84	199		0	47	nd	nd	nd	381	0	0	0	0	0	0
k__Bacteria_p__Proteobacteria_c__Gammaproteobacteria_o__Alteromonadales_f__125ds10_g___s__	0	4	29	24	0	15	46	0	15	134	18	0		44	0	nd	nd	nd	0	0	42	8	89	32	31
k__Bacteria_p__Proteobacteria_c__Gammaproteobacteria_o__Alteromonadales_f__211ds20_g___s__	0	142	19	71	266	117	299	0	456	206	161	159		204	24	nd	nd	nd	25	68	0	200	125	170	530
k__Bacteria_p__Proteobacteria_c__Gammaproteobacteria_o__Alteromonadales_f__Alteromonadaceae_g___s__	0	51	258	5	16	13	224	35	274	99	87	114		0	0	nd	nd	nd	0	0	0	37	82	87	262
k__Bacteria_p__Proteobacteria_c__Gammaproteobacteria_o__Alteromonadales_f__Alteromonadaceae_g__Cellvibrio_s__	74	447	274	74	197	279	864	105	1096	739	202	899		325	0	nd	nd	nd	58	183	845	262	292	255	743
k__Bacteria_p__Proteobacteria_c__Gammaproteobacteria_o__Alteromonadales_f__Alteromonadaceae_g__Porticoccus_NA	0	0	0	0	0	0	0	0	52	0	0	0		0	0	nd	nd	nd	0	0	0	0	0	0	0
k__Bacteria_p__Proteobacteria_c__Gammaproteobacteria_o__Alteromonadales_f__Alteromonadaceae_g__unclassified_s__Pseudomonadales	0	0	0	0	0	0	0	39	0	18	0	0		0	0	nd	nd	nd	0	0	0	0	0	0	0
k__Bacteria_p__Proteobacteria_c__Gammaproteobacteria_o__Alteromonadales_f__Alteromonadaceae_NA_NA	0	0	0	27	9	27	7	0	8	15	0	0		0	0	nd	nd	nd	0	0	0	0	0	0	0
k__Bacteria_p__Proteobacteria_c__Gammaproteobacteria_o__Alteromonadales_f__HTCC2188_g__HTCC_s__	0	0	0	0	0	0	0	0	0	12	0	0		0	0	nd	nd	nd	0	0	0	5	0	0	0
k__Bacteria_p__Proteobacteria_c__Gammaproteobacteria_o__Alteromonadales_f__HTCC2188_NA_NA	0	0	0	0	0	4	0	0	0	0	0	0		0	0	nd	nd	nd	0	0	0	0	0	0	0
k__Bacteria_p__Proteobacteria_c__Gammaproteobacteria_o__Alteromonadales_f__Moritellaceae_g__Moritella_s__	0	0	0	0	0	0	0	0	0	33	0	0		0	0	nd	nd	nd	0	0	0	0	0	0	0
k__Bacteria_p__Proteobacteria_c__Gammaproteobacteria_o__Alteromonadales_f__OM60_g___s__	4	62	55	19	23	123	198	50	191	116	33	184		778	56	nd	nd	nd	0	55	0	247	103	321	593
k__Bacteria_p__Proteobacteria_c__Gammaproteobacteria_o__Alteromonadales_f__OM60_g__Congregibacter_s__	0	4	31	0	0	0	0	0	0	0	0	0		0	0	nd	nd	nd	0	0	0	0	0	0	0
k__Bacteria_p__Proteobacteria_c__Gammaproteobacteria_o__Alteromonadales_f__OM60_NA_NA	0	0	0	0	12	0	16	0	0	0	0	0		0	0	nd	nd	nd	0	0	0	0	0	0	0
k__Bacteria_p__Proteobacteria_c__Gammaproteobacteria_o__Alteromonadales_f__Shewanellaceae_g__Shewanella_s__	0	0	0	0	8	0	0	0	9	0	0	0		0	0	nd	nd	nd	0	0	0	0	0	0	0
k__Bacteria_p__Proteobacteria_c__Gammaproteobacteria_o__Alteromonadales_NA_NA_NA	30	0	0	0	0	0	0	0	30	31	20	0		4	0	nd	nd	nd	0	12	0	0	16	19	80
k__Bacteria_p__Proteobacteria_c__Gammaproteobacteria_o__Alteromonadales_s____0	0	0	0	0	0	0	0	0	0	0	0	0		0	0	nd	nd	nd	0	0	0	0	0	0	0
k__Bacteria_p__Proteobacteria_c__Gammaproteobacteria_o__Chromatiales_f___g___s__	92	8	65	0	20	15	39	0	57	72	17	0		0	19	nd	nd	nd	41	20	0	8	0	32	88
k__Bacteria_p__Proteobacteria_c__Gammaproteobacteria_o__Chromatiales_f__Chromatiaceae_g___s__	0	0	0	0	0	0	0	0	0	6	0	0		0	0	nd	nd	nd	0	0	0	0	0	0	0
k__Bacteria_p__Proteobacteria_c__Gammaproteobacteria_o__Chromatiales_f__Ectothiorhodospiraceae_g___s__	0	0	0	0	25	339	121	0	223	51	0	0		29	17	nd	nd	nd	0	93	0	316	8	0	0
k__Bacteria_p__Proteobacteria_c__Gammaproteobacteria_o__Chromatiales_f__Ectothiorhodospiraceae_g__Thiorhodospira_s__	0	0	0	0	0	0	0	0	0	0	3	0		0	0	nd	nd	nd	0	0	0	0	0	0	0
k__Bacteria_p__Proteobacteria_c__Gammaproteobacteria_o__Chromatiales_f__Halothiobacillaceae_g__Thiovirga_s__	0	0	0	0	26	48	10	0	11	19	0	6		0	0	nd	nd	nd	0	0	0	0	0	0	0
k__Bacteria_p__Proteobacteria_c__Gammaproteobacteria_o__Chromatiales_NA_NA_NA	0	0	20	0	40	16	0	0	29	16	0	0		0	0	nd	nd	nd	0	4	0	0	0	27	15
k__Bacteria_p__Proteobacteria_c__Gammaproteobacteria_o__Enterobacteriales_f__Enterobacteriaceae_g__Brenneria_s__quercina	0	0	0	0	3	0	0	0	0	0	0	0		0	0	nd	nd	nd	0	0	0	0	0	0	0
k__Bacteria_p__Proteobacteria_c__Gammaproteobacteria_o__Enterobacteriales_f__Enterobacteriaceae_g__Citrobacter_s__	0	0	0	0	0	0	0	0	24	0	0	0		0	0	nd	nd	nd	0	0	0	0	20	0	0
k__Bacteria_p__Proteobacteria_c__Gammaproteobacteria_o__Enterobacteriales_f__Enterobacteriaceae_g__Dickeya_s__	0	50	16	0	0	0	0	0	0	0	0	20		0	0	nd	nd	nd	0	0	0	0	0	0	0
k__Bacteria_p__Proteobacteria_c__Gammaproteobacteria_o__Enterobacteriales_f__Enterobacteriaceae_g__Enterobacter_NA	0	18	0	0	0	0	0	0	0	0	0	2		0	0	nd	nd	nd	0	0	0	0	0	0	0
k__Bacteria_p__Proteobacteria_c__Gammaproteobacteria_o__Enterobacteriales_f__Enterobacteriaceae_g__Enterobacter_s__	0	0	0	0	0	0	0	0	0	25	0	0		0	0	nd	nd	nd	0	0	0	0	0	0	0
k__Bacteria_p__Proteobacteria_c__Gammaproteobacteria_o__Enterobacteriales_f__Enterobacteriaceae_g__Enterobacter_s__hormaechei	0	0	27	0	0	0	0	0	0	0	0	0		0	0	nd	nd	nd	0	0	0	0	0	0	0
k__Bacteria_p__Proteobacteria_c__Gammaproteobacteria_o__Enterobacteriales_f__Enterobacteriaceae_g__Erwinia_NA	0	0	0	11	0	0	0	0	0	0	0	0		0	0	nd	nd	nd	0	0	0	0	0	0	0
k__Bacteria_p__Proteobacteria_c__Gammaproteobacteria_o__Enterobacteriales_f__Enterobacteriaceae_g__Erwinia_s__	0	0	87	0	0	30	0	0	0	16	34	514		84	324	nd	nd	nd	0	0	0	0	0	0	99
k__Bacteria_p__Proteobacteria_c__Gammaproteobacteria_o__Enterobacteriales_f__Enterobacteriaceae_g__Escherichia_s__coli	0	14	0	0	0	0	0	0	0	0	0	0		0	0	nd	nd	nd	0	0	0	0	0	0	0
k__Bacteria_p__Proteobacteria_c__Gammaproteobacteria_o__Enterobacteriales_f__Enterobacteriaceae_g__Klebsiella_s__	0	193	0	53	152	100	51	0	0	42	0	649		368	117	nd	nd	nd	148	50	32	27	0	0	300
k__Bacteria_p__Proteobacteria_c__Gammaproteobacteria_o__Enterobacteriales_f__Enterobacteriaceae_g__Leminorella_s__grimontii	0	0	0	0	0	0	43	0	37	54	17	0		0	0	nd	nd	nd	0	0	0	0	0	0	0
k__Bacteria_p__Proteobacteria_c__Gammaproteobacteria_o__Enterobacteriales_f__Enterobacteriaceae_g__Pantoea_NA	0	202	54	20	0	42	0	0	0	0	0	0		0	0	nd	nd	nd	0	0	0	0	0	0	123
k__Bacteria_p__Proteobacteria_c__Gammaproteobacteria_o__Enterobacteriales_f__Enterobacteriaceae_g__Pantoea_s__agglomerans	11	212	0	38	0	210	22	55	15	0	41	1995		470	67	nd	nd	nd	190	33	0	0	0	0	1411
k__Bacteria_p__Proteobacteria_c__Gammaproteobacteria_o__Enterobacteriales_f__Enterobacteriaceae_g__Plesiomonas_s__shigelloides	0	0	63	38	0	0	0	0	0	0	0	0		0	0	nd	nd	nd	0	0	0	0	0	0	0
k__Bacteria_p__Proteobacteria_c__Gammaproteobacteria_o__Enterobacteriales_f__Enterobacteriaceae_g__Providencia_s__	0	0	41	21	0	0	9	0	63	0	0	0		0	0	nd	nd	nd	0	0	0	0	0	0	0
k__Bacteria_p__Proteobacteria_c__Gammaproteobacteria_o__Enterobacteriales_f__Enterobacteriaceae_g__Serratia_s__	0	0	26	20	0	0	0	0	0	0	0	16		27	0	nd	nd	nd	0	78	0	0	39	38	0
k__Bacteria_p__Proteobacteria_c__Gammaproteobacteria_o__Enterobacteriales_f__Enterobacteriaceae_g__Sodalis_s__	0	0	0	0	34	0	0	0	58	0	0	0		0	0	nd	nd	nd	0	0	0	33	0	0	0
k__Bacteria_p__Proteobacteria_c__Gammaproteobacteria_o__Enterobacteriales_f__Enterobacteriaceae_g__Thorsellia_s__anophelis	0	0	0	0	0	0	0	0	0	0	0	0		0	0	nd	nd	nd	0	0	0	0	0	0	0
k__Bacteria_p__Proteobacteria_c__Gammaproteobacteria_o__Enterobacteriales_f__Enterobacteriaceae_g__Xenorhabdus_NA	0	2	0	0	0	0	0	0	0	0	0	0		0	0	nd	nd	nd	0	0	0	0	0	0	0
k__Bacteria_p__Proteobacteria_c__Gammaproteobacteria_o__Enterobacteriales_f__Enterobacteriaceae_g__Yersinia_s__	0	70	156	0	0	84	78	0	332	219	270	221		96	0	nd	nd	nd	180	108	0	43	134	31	191
k__Bacteria_p__Proteobacteria_c__Gammaproteobacteria_o__Enterobacteriales_f__Enterobacteriaceae_NA_NA	0	244	93	33	57	319	341	132	287	34	186	347		230	226	nd	nd	nd	135	368	0	57	43	28	347
k__Bacteria_p__Proteobacteria_c__Gammaproteobacteria_o__HOC36_f___g___s__	0	0	0	0	0	0	0	0	0	0	0	0		0	0	nd	nd	nd	0	0	0	0	7	0	0
k__Bacteria_p__Proteobacteria_c__Gammaproteobacteria_o__HTCC2188_f___g___s__	0	0	0	10	0	3	0	0	0	0	0	0		0	0	nd	nd	nd	0	0	0	0	0	0	0
k__Bacteria_p__Proteobacteria_c__Gammaproteobacteria_o__HTCC2188_f__HTCC2089_g___s__	0	0	18	35	16	26	86	5	51	147	8	0		152	15	nd	nd	nd	0	7	0	62	64	122	152
k__Bacteria_p__Proteobacteria_c__Gammaproteobacteria_o__Legionellales_f___g___s__	0	70	5	29	93	54	177	73	283	345	327	123		241	170	nd	nd	nd	21	166	48	168	226	231	101
k__Bacteria_p__Proteobacteria_c__Gammaproteobacteria_o__Legionellales_f__Coxiellaceae_g___s__	15	69	35	21	57	73	337	60	311	320	127	63		493	467	nd	nd	nd	50	239	0	313	71	412	31
k__Bacteria_p__Proteobacteria_c__Gammaproteobacteria_o__Legionellales_f__Coxiellaceae_g__Aquicella_s__	163	0	120	0	54	51	152	67	27	264	54	38		152	246	nd	nd	nd	19	38	0	98	69	128	33
k__Bacteria_p__Proteobacteria_c__Gammaproteobacteria_o__Legionellales_f__Coxiellaceae_g__Coxiella_s__	2	0	53	0	0	0	0	0	0	0	0	0		21	45	nd	nd	nd	0	0	0	0	0	0	0
k__Bacteria_p__Proteobacteria_c__Gammaproteobacteria_o__Legionellales_f__Coxiellaceae_g__Rickettsiella_s__	0	11	130	21	49	64	121	0	113	29	21	88		42	18	nd	nd	nd	11	0	0	23	59	685	7
k__Bacteria_p__Proteobacteria_c__Gammaproteobacteria_o__Legionellales_f__Francisellaceae_g___s__	0	0	0	0	0	0	0	0	0	0	0	0		0	0	nd	nd	nd	0	0	0	0	0	0	0
k__Bacteria_p__Proteobacteria_c__Gammaproteobacteria_o__Legionellales_f__Francisellaceae_g__Caedibacter_s__taeniospiralis	0	13	0	0	0	29	0	0	0	0	0	0		0	0	nd	nd	nd	0	0	0	0	0	0	0
k__Bacteria_p__Proteobacteria_c__Gammaproteobacteria_o__Legionellales_f__Legionellaceae_g___s__	26	18	21	32	59	155	109	76	88	70	76	3		336	129	nd	nd	nd	77	452	0	307	88	355	0
k__Bacteria_p__Proteobacteria_c__Gammaproteobacteria_o__Legionellales_f__Legionellaceae_g__Legionella_NA	0	0	0	0	25	23	0	40	0	7	4	0		28	4	nd	nd	nd	0	32	0	7	3	19	2
k__Bacteria_p__Proteobacteria_c__Gammaproteobacteria_o__Legionellales_f__Legionellaceae_g__Legionella_s__	0	8	81	21	75	35	69	42	10	11	152	139		118	148	nd	nd	nd	60	240	0	67	0	16	0
k__Bacteria_p__Proteobacteria_c__Gammaproteobacteria_o__Legionellales_f__Legionellaceae_g__Legionella_s__quinlivanii	0	0	0	0	12	0	0	0	0	0	0	0		0	0	nd	nd	nd	0	0	0	0	0	0	0
k__Bacteria_p__Proteobacteria_c__Gammaproteobacteria_o__Legionellales_f__Legionellaceae_g__Tatlockia_NA	0	0	0	0	0	0	0	0	0	0	0	0		0	0	nd	nd	nd	3	0	0	0	0	0	0
k__Bacteria_p__Proteobacteria_c__Gammaproteobacteria_o__Legionellales_f__Legionellaceae_g__Tatlockia_s__	5	43	0	0	12	7	65	50	29	74	0	0		20	0	nd	nd	nd	0	389	20	31	11	33	0
k__Bacteria_p__Proteobacteria_c__Gammaproteobacteria_o__Legionellales_f__Legionellaceae_NA_NA	37	39	89	16	72	4	134	29	107	60	18	0		79	138	nd	nd	nd	16	316	0	167	0	158	0
k__Bacteria_p__Proteobacteria_c__Gammaproteobacteria_o__Legionellales_NA_NA_NA	26	45	30	19	38	54	52	49	25	136	10	15		174	29	nd	nd	nd	38	318	0	65	118	48	95
k__Bacteria_p__Proteobacteria_c__Gammaproteobacteria_o__Methylococcales_f___g___s__	0	0	0	0	0	0	0	0	0	30	0	0		0	0	nd	nd	nd	0	0	0	0	0	0	0
k__Bacteria_p__Proteobacteria_c__Gammaproteobacteria_o__Methylococcales_f__Crenotrichaceae_g__Crenothrix_s__	0	63	27	0	190	127	842	13	1627	710	274	516		0	0	nd	nd	nd	0	0	0	6	0	0	8
k__Bacteria_p__Proteobacteria_c__Gammaproteobacteria_o__Methylococcales_f__Methylococcaceae_g___s__	0	0	0	0	0	35	123	0	18	19	31	24		0	0	nd	nd	nd	0	0	0	0	0	0	0
k__Bacteria_p__Proteobacteria_c__Gammaproteobacteria_o__Methylococcales_f__Methylococcaceae_g__Methylocaldum_s__	0	5	0	0	14	18	32	0	21	34	0	44		0	0	nd	nd	nd	0	0	0	0	0	0	0
k__Bacteria_p__Proteobacteria_c__Gammaproteobacteria_o__Methylococcales_f__Methylococcaceae_g__Methylococcus_s__capsulatus	0	0	0	0	0	0	0	0	0	0	0	0		0	0	nd	nd	nd	0	0	0	0	0	0	0
k__Bacteria_p__Proteobacteria_c__Gammaproteobacteria_o__Methylococcales_f__Methylococcaceae_g__Methylomonas_s__	0	0	0	0	50	0	0	118	0	0	0	0		0	0	nd	nd	nd	0	0	0	0	0	0	0
k__Bacteria_p__Proteobacteria_c__Gammaproteobacteria_o__Methylococcales_f__Methylococcaceae_NA_NA	0	0	0	0	11	12	0	0	25	0	0	0		0	0	nd	nd	nd	0	0	0	0	0	0	0
k__Bacteria_p__Proteobacteria_c__Gammaproteobacteria_o__Methylococcales_NA_NA_NA	0	0	0	0	0	0	0	0	17	18	34	0		0	0	nd	nd	nd	0	0	0	0	0	0	0
k__Bacteria_p__Proteobacteria_c__Gammaproteobacteria_o__Oceanospirillale_f__Oleiphilaceae_g___s__	0	0	0	0	0	0	0	0	0	0	19	0		0	0	nd	nd	nd	0	0	0	0	0	0	0
k__Bacteria_p__Proteobacteria_c__Gammaproteobacteria_o__Oceanospirillales_f__Halomonadaceae_g___s__	0	4	16	0	7	10	21	0	0	48	0	0		0	0	nd	nd	nd	0	0	0	0	9	23	16
k__Bacteria_p__Proteobacteria_c__Gammaproteobacteria_o__Oceanospirillales_f__Halomonadaceae_g__CandidatusPortiera_s__	0	0	0	0	0	0	0	0	0	10	0	0		0	0	nd	nd	nd	0	0	0	0	0	0	0
k__Bacteria_p__Proteobacteria_c__Gammaproteobacteria_o__Oceanospirillales_f__Halomonadaceae_g__Halomonas_s__	0	0	0	0	0	0	0	5	0	0	0	0		0	0	nd	nd	nd	0	0	0	0	0	0	0
k__Bacteria_p__Proteobacteria_c__Gammaproteobacteria_o__Oceanospirillales_f__Halomonadaceae_g__Halomonas_s__phosphatis	0	6	32	3	0	0	0	0	6	0	0	0		0	0	nd	nd	nd	0	0	0	0	0	0	0
k__Bacteria_p__Proteobacteria_c__Gammaproteobacteria_o__Oceanospirillales_f__Oleiphilaceae_g___s__	0	0	4	6	8	31	0	0	0	36	0	35		0	10	nd	nd	nd	7	0	0	8	38	11	63
k__Bacteria_p__Proteobacteria_c__Gammaproteobacteria_o__Oceanospirillales_NA_NA_NA	0	0	0	0	0	0	0	14	0	0	0	0		0	0	nd	nd	nd	0	0	0	0	0	0	0
k__Bacteria_p__Proteobacteria_c__Gammaproteobacteria_o__Pasteurellales_f___g___s__	0	0	0	0	4	0	0	0	0	0	7	0		0	0	nd	nd	nd	8	0	0	0	0	13	9
k__Bacteria_p__Proteobacteria_c__Gammaproteobacteria_o__Pseudomonadales_f___g___s__	0	0	0	0	0	0	0	0	0	0	0	0		0	0	nd	nd	nd	0	0	0	0	0	0	0
k__Bacteria_p__Proteobacteria_c__Gammaproteobacteria_o__Pseudomonadales_f__Moraxellaceae_g___s__	0	0	0	0	0	7	10	0	0	0	0	0		0	0	nd	nd	nd	0	0	0	0	0	0	0
k__Bacteria_p__Proteobacteria_c__Gammaproteobacteria_o__Pseudomonadales_f__Moraxellaceae_g__Acinetobacter_NA	0	0	60	0	0	0	0	0	0	136	0	0		0	0	nd	nd	nd	0	0	0	0	0	0	0
k__Bacteria_p__Proteobacteria_c__Gammaproteobacteria_o__Pseudomonadales_f__Moraxellaceae_g__Acinetobacter_s__	0	44	404	245	59	49	0	77	88	50	41	187		225	553	nd	nd	nd	16	66	0	0	28	38	190
k__Bacteria_p__Proteobacteria_c__Gammaproteobacteria_o__Pseudomonadales_f__Moraxellaceae_g__Acinetobacter_s__johnsonii	7	0	0	0	0	0	1313	0	0	0	0	0		0	0	nd	nd	nd	0	35	0	14	0	0	0
k__Bacteria_p__Proteobacteria_c__Gammaproteobacteria_o__Pseudomonadales_f__Moraxellaceae_g__Acinetobacter_s__lwoffii	38	5	295	59	9	98	26268	89	136	21	0	0		0	592	nd	nd	nd	241	324	124	225	0	0	52
k__Bacteria_p__Proteobacteria_c__Gammaproteobacteria_o__Pseudomonadales_f__Moraxellaceae_g__Acinetobacter_s__rhizosphaerae	0	0	0	0	7	0	310	0	0	0	6	0		16	0	nd	nd	nd	0	61	0	0	0	91	0
k__Bacteria_p__Proteobacteria_c__Gammaproteobacteria_o__Pseudomonadales_f__Moraxellaceae_g__Agitococcus_s__lubricus	0	12	86	71	17	45	9	12	73	48	8	95		11	0	nd	nd	nd	28	19	0	0	0	0	132
k__Bacteria_p__Proteobacteria_c__Gammaproteobacteria_o__Pseudomonadales_f__Moraxellaceae_g__Alkanindiges_s__	0	76	81	0	80	50	86	5	0	81	43	164		0	0	nd	nd	nd	0	0	0	0	0	11	359
k__Bacteria_p__Proteobacteria_c__Gammaproteobacteria_o__Pseudomonadales_f__Moraxellaceae_g__Enhydrobacter_s__	0	0	0	0	0	0	5	0	0	0	0	0		0	0	nd	nd	nd	0	0	0	7	0	0	0
k__Bacteria_p__Proteobacteria_c__Gammaproteobacteria_o__Pseudomonadales_f__Moraxellaceae_g__Perlucidibaca_s__	0	0	238	143	10	9	72	18	138	90	7	97		219	215	nd	nd	nd	18	89	0	0	5	50	9
k__Bacteria_p__Proteobacteria_c__Gammaproteobacteria_o__Pseudomonadales_f__Moraxellaceae_g__Psychrobacter_NA	0	0	0	0	0	0	0	0	0	0	0	0		0	0	nd	nd	nd	0	0	0	0	0	0	0
k__Bacteria_p__Proteobacteria_c__Gammaproteobacteria_o__Pseudomonadales_f__Moraxellaceae_g__Psychrobacter_s__	0	0	0	0	0	0	0	0	0	0	0	0		0	0	nd	nd	nd	0	0	0	0	0	0	0
k__Bacteria_p__Proteobacteria_c__Gammaproteobacteria_o__Pseudomonadales_f__Moraxellaceae_g__Psychrobacter_s__pacificensis	0	0	0	0	0	0	0	0	0	0	4	0		0	0	nd	nd	nd	0	0	0	0	0	0	0
k__Bacteria_p__Proteobacteria_c__Gammaproteobacteria_o__Pseudomonadales_f__Moraxellaceae_NA_NA	0	0	51	0	0	21	29	0	0	0	0	0		0	30	nd	nd	nd	0	0	0	0	0	0	0
k__Bacteria_p__Proteobacteria_c__Gammaproteobacteria_o__Pseudomonadales_f__Pseudomonadaceae_g___s__	0	29	74	35	0	41	36	0	116	51	41	98		31	24	nd	nd	nd	85	0	0	0	0	0	0
k__Bacteria_p__Proteobacteria_c__Gammaproteobacteria_o__Pseudomonadales_f__Pseudomonadaceae_g__Pseudomonas_NA	0	129	77	0	42	127	0	0	35	46	187	106		99	57	nd	nd	nd	280	63	0	0	0	0	27
k__Bacteria_p__Proteobacteria_c__Gammaproteobacteria_o__Pseudomonadales_f__Pseudomonadaceae_g__Pseudomonas_s__	0	116	264	595	92	664	308	138	213	244	135	761		0	408	nd	nd	nd	1296	784	153	613	139	546	225
k__Bacteria_p__Proteobacteria_c__Gammaproteobacteria_o__Pseudomonadales_f__Pseudomonadaceae_g__Pseudomonas_s__alcaligenes	0	35	21	110	0	8	0	0	0	0	0	0		0	21	nd	nd	nd	0	0	0	0	0	0	0
k__Bacteria_p__Proteobacteria_c__Gammaproteobacteria_o__Pseudomonadales_f__Pseudomonadaceae_g__Pseudomonas_s__fragi	0	82	0	0	0	0	0	235	113	86	0	853		0	37	nd	nd	nd	87	44	0	0	19	0	180
k__Bacteria_p__Proteobacteria_c__Gammaproteobacteria_o__Pseudomonadales_f__Pseudomonadaceae_g__Pseudomonas_s__stutzeri	0	0	0	0	0	0	7	0	0	0	0	0		0	0	nd	nd	nd	0	0	0	0	0	0	0
k__Bacteria_p__Proteobacteria_c__Gammaproteobacteria_o__Pseudomonadales_f__Pseudomonadaceae_g__Pseudomonas_s__umsongensis	0	0	0	0	0	0	0	0	0	48	0	68		0	0	nd	nd	nd	0	0	0	34	0	46	0
k__Bacteria_p__Proteobacteria_c__Gammaproteobacteria_o__Pseudomonadales_f__Pseudomonadaceae_g__Pseudomonas_s__veronii	0	120	451	39	0	171	107	237	222	193	62	411		0	53	nd	nd	nd	50	468	54	148	0	25	412
k__Bacteria_p__Proteobacteria_c__Gammaproteobacteria_o__Pseudomonadales_f__Pseudomonadaceae_g__Pseudomonas_s__viridiflava	0	0	50	25	47	293	82	0	70	131	0	1493		71	89	nd	nd	nd	1336	990	45	37	38	18	396
k__Bacteria_p__Proteobacteria_c__Gammaproteobacteria_o__Pseudomonadales_f__Pseudomonadaceae_NA_NA	0	66	79	2961	0	60	40	0	0	22	0	237		66	1770	nd	nd	nd	295	19	0	4	0	0	79
k__Bacteria_p__Proteobacteria_c__Gammaproteobacteria_o__Pseudomonadales_NA_NA_NA	0	0	11	0	0	0	0	0	0	0	0	0		0	0	nd	nd	nd	0	0	0	0	0	0	0
k__Bacteria_p__Proteobacteria_c__Gammaproteobacteria_o__PYR10d3_f___g___s__	0	0	70	0	0	0	0	0	0	0	0	0		0	0	nd	nd	nd	0	0	0	0	0	0	0
k__Bacteria_p__Proteobacteria_c__Gammaproteobacteria_o__Thiotrichales_f__Piscirickettsiaceae_g___s__	8	30	81	26	72	30	139	162	109	227	30	59		996	227	nd	nd	nd	34	89	0	391	619	672	1133
k__Bacteria_p__Proteobacteria_c__Gammaproteobacteria_o__Thiotrichales_f__Thiotrichaceae_g___s__	0	0	0	17	0	0	46	0	0	11	3	0		0	0	nd	nd	nd	0	0	0	0	0	0	2
k__Bacteria_p__Proteobacteria_c__Gammaproteobacteria_o__Thiotrichales_f__Thiotrichaceae_NA_NA	0	0	0	0	0	0	0	0	0	0	0	4		0	0	nd	nd	nd	0	0	0	0	0	0	0
k__Bacteria_p__Proteobacteria_c__Gammaproteobacteria_o__Vibrionales_f__Pseudoalteromonadaceae_g__Vibrio_NA	0	0	0	0	23	0	0	0	0	0	0	0		0	0	nd	nd	nd	0	0	0	0	0	0	0
k__Bacteria_p__Proteobacteria_c__Gammaproteobacteria_o__Vibrionales_f__Pseudoalteromonadaceae_g__Vibrio_s__cholerae	0	0	0	0	20	0	0	0	0	0	0	0		0	0	nd	nd	nd	0	0	0	0	0	0	0
k__Bacteria_p__Proteobacteria_c__Gammaproteobacteria_o__Vibrionales_f__Pseudoalteromonadaceae_NA_NA	0	0	0	0	0	0	0	0	0	0	0	0		0	0	nd	nd	nd	0	0	0	0	0	0	0
k__Bacteria_p__Proteobacteria_c__Gammaproteobacteria_o__Vibrionales_f__Vibrionaceae_g__Vibrio_NA	0	0	0	0	0	10	0	0	0	0	0	0		0	0	nd	nd	nd	0	0	0	0	0	0	0
k__Bacteria_p__Proteobacteria_c__Gammaproteobacteria_o__Vibrionales_f__Vibrionaceae_NA_NA	0	0	0	0	0	16	6	0	0	0	80	164		0	0	nd	nd	nd	0	0	0	0	0	0	0
k__Bacteria_p__Proteobacteria_c__Gammaproteobacteria_o__Vibrionales_NA_NA_NA	0	0	0	0	0	0	0	0	0	0	2	0		0	0	nd	nd	nd	0	0	0	0	0	0	0
k__Bacteria_p__Proteobacteria_c__Gammaproteobacteria_o__Xanthomonadales_f___g___s__	0	0	0	0	0	0	0	0	0	0	0	0		0	0	nd	nd	nd	0	0	0	0	0	0	0
k__Bacteria_p__Proteobacteria_c__Gammaproteobacteria_o__Xanthomonadales_f__Sinobacteraceae_g___s__	22	73	501	178	571	275	619	252	950	960	127	370		1578	272	nd	nd	nd	187	333	8	788	1023	1314	2098
k__Bacteria_p__Proteobacteria_c__Gammaproteobacteria_o__Xanthomonadales_f__Sinobacteraceae_g__Alkanibacter_s__difficilis	0	0	16	0	0	5	0	0	0	0	2	2		0	0	nd	nd	nd	10	10	0	0	0	0	0
k__Bacteria_p__Proteobacteria_c__Gammaproteobacteria_o__Xanthomonadales_f__Sinobacteraceae_g__Hydrocarboniphaga_s__	0	0	0	0	0	8	0	0	0	0	0	0		0	0	nd	nd	nd	21	0	0	0	0	0	0
k__Bacteria_p__Proteobacteria_c__Gammaproteobacteria_o__Xanthomonadales_f__Sinobacteraceae_g__Hydrocarboniphaga_s__effusa	0	0	0	0	0	0	0	0	0	62	0	0		0	0	nd	nd	nd	0	0	0	11	0	0	0
k__Bacteria_p__Proteobacteria_c__Gammaproteobacteria_o__Xanthomonadales_f__Sinobacteraceae_g__Nevskia_s__ramosa	0	0	115	0	0	0	57	0	0	0	0	15		0	26	nd	nd	nd	0	14	26	84	0	0	14
k__Bacteria_p__Proteobacteria_c__Gammaproteobacteria_o__Xanthomonadales_f__Sinobacteraceae_g__Steroidobacter_s__	10	21	163	0	205	104	178	79	285	272	53	132		212	16	nd	nd	nd	35	0	41	162	242	389	528
k__Bacteria_p__Proteobacteria_c__Gammaproteobacteria_o__Xanthomonadales_f__Sinobacteraceae_NA_NA	0	0	0	25	0	4	0	0	33	28	0	37		40	81	nd	nd	nd	418	14	0	35	31	0	75
k__Bacteria_p__Proteobacteria_c__Gammaproteobacteria_o__Xanthomonadales_f__Xanthomonadaceae_g___s__	0	136	130	66	113	195	113	80	106	265	163	311		286	34	nd	nd	nd	18	47	24	169	176	76	274
k__Bacteria_p__Proteobacteria_c__Gammaproteobacteria_o__Xanthomonadales_f__Xanthomonadaceae_g__Aquimonas_s__	0	0	0	0	0	0	0	0	0	0	5	0		0	0	nd	nd	nd	0	0	0	0	0	0	0
k__Bacteria_p__Proteobacteria_c__Gammaproteobacteria_o__Xanthomonadales_f__Xanthomonadaceae_g__Arenimonas_s__	0	0	21	22	10	49	87	12	0	0	0	16		26	0	nd	nd	nd	0	4	0	41	0	0	0
k__Bacteria_p__Proteobacteria_c__Gammaproteobacteria_o__Xanthomonadales_f__Xanthomonadaceae_g__Arenimonas_s__oryziterrae	0	0	0	0	0	21	17	0	22	22	10	0		0	0	nd	nd	nd	0	0	0	0	0	0	0
k__Bacteria_p__Proteobacteria_c__Gammaproteobacteria_o__Xanthomonadales_f__Xanthomonadaceae_g__Dokdonella_s__	0	0	29	0	9	0	14	0	0	0	0	0		27	0	nd	nd	nd	20	67	0	16	15	42	0
k__Bacteria_p__Proteobacteria_c__Gammaproteobacteria_o__Xanthomonadales_f__Xanthomonadaceae_g__Ignatzschineria_s__	0	0	0	5	0	0	0	0	102	105	35	0		0	0	nd	nd	nd	0	0	0	8	0	0	15
k__Bacteria_p__Proteobacteria_c__Gammaproteobacteria_o__Xanthomonadales_f__Xanthomonadaceae_g__Luteibacter_s__rhizovicinus	0	18	0	0	18	26	24	0	0	0	0	15		0	0	nd	nd	nd	14	25	0	0	0	0	0
k__Bacteria_p__Proteobacteria_c__Gammaproteobacteria_o__Xanthomonadales_f__Xanthomonadaceae_g__Luteimonas_s__	0	32	156	0	8	0	24	0	0	36	32	32		53	0	nd	nd	nd	0	0	38	0	0	11	17
k__Bacteria_p__Proteobacteria_c__Gammaproteobacteria_o__Xanthomonadales_f__Xanthomonadaceae_g__Lysobacter_s__	4	6	186	40	0	43	109	0	91	21	7	0		102	0	nd	nd	nd	33	247	0	296	17	0	0
k__Bacteria_p__Proteobacteria_c__Gammaproteobacteria_o__Xanthomonadales_f__Xanthomonadaceae_g__Pseudoxanthomonas_NA	0	0	72	0	0	12	86	0	0	0	0	0		0	0	nd	nd	nd	0	0	0	0	0	0	0
k__Bacteria_p__Proteobacteria_c__Gammaproteobacteria_o__Xanthomonadales_f__Xanthomonadaceae_g__Pseudoxanthomonas_s__mexicana	0	0	86	0	0	0	0	0	0	0	0	0		0	0	nd	nd	nd	0	0	0	0	0	0	0
k__Bacteria_p__Proteobacteria_c__Gammaproteobacteria_o__Xanthomonadales_f__Xanthomonadaceae_g__Stenotrophomonas_s__	6	118	11	331	133	177	206	24	38	13	0	0		84	20	nd	nd	nd	41	144	74	93	0	0	0
k__Bacteria_p__Proteobacteria_c__Gammaproteobacteria_o__Xanthomonadales_f__Xanthomonadaceae_g__Stenotrophomonas_s__acidaminiphila	0	0	0	0	0	7	0	0	0	0	0	0		45	0	nd	nd	nd	0	0	0	0	0	0	0
k__Bacteria_p__Proteobacteria_c__Gammaproteobacteria_o__Xanthomonadales_f__Xanthomonadaceae_g__Stenotrophomonas_s__maltophilia	0	35	35	0	0	0	0	35	28	71	0	65		0	0	nd	nd	nd	158	18	278	23	9	0	15
k__Bacteria_p__Proteobacteria_c__Gammaproteobacteria_o__Xanthomonadales_f__Xanthomonadaceae_g__Thermomonas_s__	0	0	12	10	22	23	34	0	149	21	0	32		44	0	nd	nd	nd	17	9	0	0	29	45	53
k__Bacteria_p__Proteobacteria_c__Gammaproteobacteria_o__Xanthomonadales_f__Xanthomonadaceae_g__Wohlfahrtiimonas_s__	0	0	0	0	2	0	0	24	0	0	0	4		0	0	nd	nd	nd	0	0	0	0	0	0	0
k__Bacteria_p__Proteobacteria_c__Gammaproteobacteria_o__Xanthomonadales_f__Xanthomonadaceae_g__Xanthomonas_s__axonopodis	0	0	0	0	0	0	0	0	0	0	0	58		0	0	nd	nd	nd	0	20	0	14	6	0	15
k__Bacteria_p__Proteobacteria_c__Gammaproteobacteria_o__Xanthomonadales_f__Xanthomonadaceae_NA_NA	0	0	63	24	0	0	7	75	35	62	7	22		85	6	nd	nd	nd	0	0	0	9	9	6	30
k__Bacteria_p__Proteobacteria_c__Gammaproteobacteria_o__Xanthomonadales_NA_NA_0	0	0	0	0	0	0	0	0	0	0	0	0		0	0	nd	nd	nd	0	0	0	0	0	0	0
k__Bacteria_p__Proteobacteria_c__TA18_o__CV90_f___g___s__	26	0	0	2	18	0	0	0	13	63	2	0		60	40	nd	nd	nd	2	11	0	32	12	56	3
k__Bacteria_p__Proteobacteria_c__TA18_o__PHOSHD29_f___g___s__	61	38	0	10	3	21	5	0	16	44	3	0		9	0	nd	nd	nd	0	0	0	0	0	0	0
k__Bacteria_p__Proteobacteria_c__Zetaproteobacteria_o__Mariprofundales_f__Mariprofundaceae_g___s__	0	0	48	0	0	17	53	26	80	76	20	47		310	36	nd	nd	nd	0	32	74	149	168	285	243
k__Bacteria_p__Proteobacteria_NA_NA_NA_NA_NA	14	228	174	93	119	116	215	273	474	340	80	86		1915	193	nd	nd	nd	61	328	0	99	187	662	108
k__Bacteria_p__SBR1093_c___o___f___g___s__	0	0	0	0	0	0	0	0	0	0	0	0		0	0	nd	nd	nd	0	0	0	0	0	0	0
k__Bacteria_p__SC4_c___o___f___g___s__	0	0	0	0	0	0	2	0	0	19	0	0		0	0	nd	nd	nd	0	0	0	0	0	0	0
k__Bacteria_p__Spirochaetes_c__[Leptospirae]_o__[Leptospirales]_f__Leptospiraceae_g__Leptospira_s__	0	0	0	0	3	0	0	0	0	0	0	0		77	0	nd	nd	nd	0	11	0	0	0	46	4
k__Bacteria_p__Spirochaetes_c__[Leptospirae]_o__[Leptospirales]_f__Leptospiraceae_g__Turneriella_s__	0	0	0	0	0	0	0	0	0	0	0	5		33	0	nd	nd	nd	0	0	0	0	0	6	16
k__Bacteria_p__Spirochaetes_c__[Leptospirae]_o__[Leptospirales]_f__Sediment4_g__SJA88_s__	0	13	0	0	0	0	0	0	0	0	0	0		0	0	nd	nd	nd	0	0	0	0	0	0	0
k__Bacteria_p__Spirochaetes_c__MVP15_o__PL11B10_f___g___s__	0	0	0	0	0	0	0	0	33	22	0	0		0	0	nd	nd	nd	0	0	0	0	0	0	0
k__Bacteria_p__Spirochaetes_c__Spirochaetes_NA_NA_NA_NA	0	0	10	0	0	0	9	0	0	0	0	0		0	0	nd	nd	nd	0	0	0	0	0	0	0
k__Bacteria_p__Spirochaetes_c__Spirochaetes_o__[Borreliales]_f__[Borreliaceae]_g__Spironema_s__	0	0	0	0	0	0	0	0	0	12	0	0		0	0	nd	nd	nd	0	0	0	0	0	0	0
k__Bacteria_p__Spirochaetes_c__Spirochaetes_o__M2PT276_f___g___s__	0	0	0	0	5	0	0	0	3	5	0	0		0	0	nd	nd	nd	0	0	0	0	0	0	0
k__Bacteria_p__Spirochaetes_c__Spirochaetes_o__Spirochaetales_f__Spirochaetaceae_g___s__	0	0	0	10	11	0	0	0	0	4	0	0		0	0	nd	nd	nd	0	85	0	0	0	3	0
k__Bacteria_p__Spirochaetes_c__Spirochaetes_o__Spirochaetales_f__Spirochaetaceae_g__Spirochaeta_NA	0	0	0	0	0	6	0	0	0	0	0	0		0	0	nd	nd	nd	0	0	0	0	0	0	0
k__Bacteria_p__Spirochaetes_c__Spirochaetes_o__Spirochaetales_f__Spirochaetaceae_g__Spirochaeta_s__africana	0	0	0	0	4	0	0	0	0	0	0	0		0	0	nd	nd	nd	0	0	0	0	0	0	0
k__Bacteria_p__Spirochaetes_c__Spirochaetes_o__Spirochaetales_f__Spirochaetaceae_g__Spirochaeta_s__aurantia	0	0	0	0	0	0	0	0	8	21	0	9		0	0	nd	nd	nd	0	0	19	7	4	0	0
k__Bacteria_p__Spirochaetes_c__Spirochaetes_o__Spirochaetales_f__Spirochaetaceae_g__Treponema_s__	0	0	0	2	16	9	0	0	0	37	7	6		0	0	nd	nd	nd	0	0	0	0	0	0	0
k__Bacteria_p__Spirochaetes_c__Spirochaetes_o__Spirochaetales_f__Spirochaetaceae_NA_NA	0	0	0	3	0	17	0	4	0	84	0	0		0	0	nd	nd	nd	0	0	0	0	0	0	0
k__Bacteria_p__Spirochaetes_NA_NA_NA_NA_NA	0	0	0	0	0	0	8	0	0	0	0	0		0	0	nd	nd	nd	0	0	0	0	0	0	0
k__Bacteria_p__SR1_c___o___f___g___s__	0	23	84	4	0	30	49	32	79	28	8	14		32	0	nd	nd	nd	0	5	0	0	16	67	30
k__Bacteria_p__Synergistetes_c__Synergistia_o__Synergistales_f__Dethiosulfovibrionaceae_g__TG5_s__	0	0	0	0	0	0	10	0	0	0	0	0		0	0	nd	nd	nd	0	0	0	0	0	0	0
k__Bacteria_p__Synergistetes_c__Synergistia_o__Synergistales_f__Synergistaceae_g__vadinCA02_s__	0	0	0	0	2	0	0	0	0	0	0	0		0	0	nd	nd	nd	0	0	0	0	0	0	0
k__Bacteria_p__Synergistetes_c__Synergistia_o__Synergistales_f__Synergistaceae_NA_NA	0	0	12	0	0	0	0	0	0	8	0	0		0	0	nd	nd	nd	0	0	0	0	0	0	0
k__Bacteria_p__Tenericutes_c__CK1C419_o___f___g___s__	0	0	0	4	8	0	7	0	37	15	5	3		13	0	nd	nd	nd	0	0	0	0	0	0	0
k__Bacteria_p__Tenericutes_c__Mollicutes_o___f___g___s__	0	17	144	3	38	35	41	0	39	108	85	8		0	7	nd	nd	nd	0	0	0	0	31	319	13
k__Bacteria_p__Tenericutes_c__Mollicutes_o__Mycoplasmatales_f__Mycoplasmataceae_g__Mycoplasma_s__hyorhinis	0	0	4	0	0	0	0	0	0	0	0	0		0	0	nd	nd	nd	0	0	0	0	0	0	0
k__Bacteria_p__TM6_c___o___f___g___s__	0	0	7	0	0	0	0	0	0	3	0	0		0	0	nd	nd	nd	0	0	0	0	0	0	0
k__Bacteria_p__TM6_c__SBRH58_o___f___g___s__	31	7	178	0	32	68	41	121	4	93	9	8		374	102	nd	nd	nd	14	193	0	6	14	38	122
k__Bacteria_p__TM6_c__SJA4_NA_NA_NA_NA	0	0	0	0	2	0	0	0	8	9	0	0		0	0	nd	nd	nd	0	0	0	0	0	0	0
k__Bacteria_p__TM6_c__SJA4_o___f___g___s__	0	16	101	24	73	51	81	57	160	237	26	4		27	0	nd	nd	nd	0	0	0	0	0	0	0
k__Bacteria_p__TM6_c__SJA4_o__S1198_f___g___s__	0	2	94	0	9	5	40	6	0	17	12	9		10	0	nd	nd	nd	0	0	0	0	0	0	0
k__Bacteria_p__TM6_NA_NA_NA_NA_NA	0	0	0	0	0	30	12	82	9	36	21	3		265	16	nd	nd	nd	0	0	0	0	0	0	0
k__Bacteria_p__TM7_c___o___f___g___s__	13	0	24	0	10	0	0	9	8	0	0	0		0	6	nd	nd	nd	0	0	0	0	0	0	0
k__Bacteria_p__TM7_c__MJK10_o___f___g___s__	0	0	0	0	3	0	0	0	0	0	0	0		0	0	nd	nd	nd	0	0	0	0	0	0	0
k__Bacteria_p__TM7_c__SC3_o___f___g___s__	0	26	38	0	40	30	3	42	9	118	0	0		48	3	nd	nd	nd	0	41	0	2	19	0	0
k__Bacteria_p__TM7_c__TM71_o___f___g___s__	14	0	62	0	22	25	0	25	8	51	0	4		55	0	nd	nd	nd	0	0	0	0	0	0	0
k__Bacteria_p__TM7_c__TM73_o___f___g___s__	0	0	0	0	0	0	0	0	0	8	0	0		0	0	nd	nd	nd	0	0	0	0	0	0	0
k__Bacteria_p__TM7_c__TM73_o__Blgi18_f___g___s__	0	0	0	0	0	0	0	0	0	12	0	0		0	0	nd	nd	nd	0	0	0	0	0	0	0
k__Bacteria_p__TM7_c__TM73_o__CW040_f__F16_g___s__	0	0	0	0	0	0	0	0	18	0	0	0		0	0	nd	nd	nd	0	0	0	0	0	0	0
k__Bacteria_p__TM7_c__TM73_o__EW055_f___g___s__	0	0	0	0	0	0	0	0	7	0	0	0		0	0	nd	nd	nd	0	0	0	0	0	0	0
k__Bacteria_p__TPD58_c___o___f___g___s__	0	0	0	0	0	0	0	0	0	9	0	0		0	0	nd	nd	nd	0	0	0	0	0	0	0
k__Bacteria_p__Verrucomicrobia_c__[Methylacidiphilae]_NA_NA_NA_NA	0	0	0	0	0	0	0	0	0	0	0	0		0	2	nd	nd	nd	0	45	0	0	0	0	0
k__Bacteria_p__Verrucomicrobia_c__[Methylacidiphilae]_o__Methylacidiphilales_f___g___s__	0	0	0	0	28	75	44	67	61	72	5	0		34	4	nd	nd	nd	0	204	0	74	29	8	6
k__Bacteria_p__Verrucomicrobia_c__[Methylacidiphilae]_o__Methylacidiphilales_f__LD19_g___s__	0	0	0	0	0	10	5	0	0	0	0	0		0	0	nd	nd	nd	0	9	0	51	4	7	3
k__Bacteria_p__Verrucomicrobia_c__[Methylacidiphilae]_o__Methylacidiphilales_f__Methylacidiphilaceae_NA_NA	0	6	0	0	0	0	0	0	0	0	0	0		0	0	nd	nd	nd	0	0	0	0	0	0	0
k__Bacteria_p__Verrucomicrobia_c__[Methylacidiphilae]_o__Methylacidiphilales_NA_NA_NA	0	0	0	0	0	0	0	0	0	0	0	0		7	0	nd	nd	nd	0	7	0	3	23	205	43
k__Bacteria_p__Verrucomicrobia_c__[Methylacidiphilae]_o__SBQ257_f___g___	0	0	0	0	12	0	0	0	0	0	0	0		0	0	nd	nd	nd	0	0	0	0	0	0	0
k__Bacteria_p__Verrucomicrobia_c__[Methylacidiphilae]_o__SBQ257_f___g___s__	0	3	0	0	29	15	55	14	7	82	22	0		4	0	nd	nd	nd	0	0	0	0	0	0	0
k__Bacteria_p__Verrucomicrobia_c__[Methylacidiphilae]_o__SBQ257_f___g__s__	0	0	0	0	0	21	0	0	0	0	0	0		0	0	nd	nd	nd	0	0	0	0	0	0	0
k__Bacteria_p__Verrucomicrobia_c__[Pedosphaerae]_NA_NA_NA_NA	0	0	0	9	9	3	24	0	0	0	0	0		47	0	nd	nd	nd	0	0	0	0	0	0	84
k__Bacteria_p__Verrucomicrobia_c__[Pedosphaerae]_o___f___g___s__	0	0	0	0	0	0	5	19	0	4	0	0		163	0	nd	nd	nd	3	0	0	0	0	0	57
k__Bacteria_p__Verrucomicrobia_c__[Pedosphaerae]_o__[Pedosphaerales]_f___g___s__	6	85	506	52	64	105	236	6	189	537	41	90		309	76	nd	nd	nd	0	90	0	306	170	510	750
k__Bacteria_p__Verrucomicrobia_c__[Pedosphaerae]_o__[Pedosphaerales]_f___s___0	0	0	0	0	0	0	0	0	0	0	0	0		0	0	nd	nd	nd	0	0	0	0	0	0	0
k__Bacteria_p__Verrucomicrobia_c__[Pedosphaerae]_o__[Pedosphaerales]_f__[Pedosphaeraceae]_g___s__	0	0	27	0	0	21	23	0	33	0	0	0		0	0	nd	nd	nd	0	0	0	11	4	0	0
k__Bacteria_p__Verrucomicrobia_c__[Pedosphaerae]_o__[Pedosphaerales]_f__[Pedosphaeraceae]_g__Pedosphaera_s__	0	0	0	0	37	16	26	0	0	0	0	0		0	0	nd	nd	nd	4	0	0	9	0	0	0
k__Bacteria_p__Verrucomicrobia_c__[Pedosphaerae]_o__[Pedosphaerales]_f__[Pedosphaeraceae]_NA_NA	0	0	0	0	0	0	0	0	0	0	0	0		0	2	nd	nd	nd	0	0	0	0	0	0	0
k__Bacteria_p__Verrucomicrobia_c__[Pedosphaerae]_o__[Pedosphaerales]_f__auto67_4W_g___s__	7	36	55	55	366	270	464	5	413	381	56	219		1009	40	nd	nd	nd	26	177	0	521	432	750	1704
k__Bacteria_p__Verrucomicrobia_c__[Pedosphaerae]_o__[Pedosphaerales]_f__Ellin515_g___s__	0	0	0	0	17	22	0	6	35	78	0	24		27	0	nd	nd	nd	0	0	0	26	32	0	30
k__Bacteria_p__Verrucomicrobia_c__[Pedosphaerae]_o__[Pedosphaerales]_f__Ellin517_g___s__	60	0	36	12	4	10	20	0	10	60	28	8		358	98	nd	nd	nd	2	25	15	119	80	221	430
k__Bacteria_p__Verrucomicrobia_c__[Pedosphaerae]_o__[Pedosphaerales]_f__OPB35_g___s__	0	0	0	0	0	0	0	0	2	9	0	0		12	6	nd	nd	nd	0	0	0	15	15	14	13
k__Bacteria_p__Verrucomicrobia_c__[Pedosphaerae]_o__[Pedosphaerales]_f__R441B_g___s__	2	61	75	73	69	41	92	0	49	117	54	203		94	0	nd	nd	nd	0	0	0	0	0	0	0
k__Bacteria_p__Verrucomicrobia_c__[Pedosphaerae]_o__[Pedosphaerales]_NA_NA_NA	11	0	29	11	35	96	15	0	94	157	11	13		144	28	nd	nd	nd	0	18	0	97	42	197	148
k__Bacteria_p__Verrucomicrobia_c__[Spartobacteria]_o__[Chthoniobacterales]_f__[Chthoniobacteraceae]__0	0	0	0	0	0	0	0	0	0	0	0	0		0	0	nd	nd	nd	0	0	0	0	0	0	0
k__Bacteria_p__Verrucomicrobia_c__[Spartobacteria]_o__[Chthoniobacterales]_f__[Chthoniobacteraceae]_g___s__	12	21	86	36	74	102	237	53	175	213	73	268		1219	48	nd	nd	nd	77	63	137	278	219	207	464
k__Bacteria_p__Verrucomicrobia_c__[Spartobacteria]_o__[Chthoniobacterales]_f__[Chthoniobacteraceae]_g__CandidatusXiphinematobacter_s__	0	0	21	9	39	53	116	62	210	190	55	211		550	0	nd	nd	nd	0	0	0	0	0	0	0
k__Bacteria_p__Verrucomicrobia_c__[Spartobacteria]_o__[Chthoniobacterales]_f__[Chthoniobacteraceae]_g__Chthoniobacter_s__	0	0	47	0	0	102	237	215	59	41	0	86		1031	67	nd	nd	nd	0	0	112	402	204	193	486
k__Bacteria_p__Verrucomicrobia_c__[Spartobacteria]_o__[Chthoniobacterales]_f__[Chthoniobacteraceae]_g__DA101_s__	0	0	12	0	0	0	63	0	17	330	0	0		39	0	nd	nd	nd	0	0	0	14	26	16	14
k__Bacteria_p__Verrucomicrobia_c__[Spartobacteria]_o__[Chthoniobacterales]_f__[Chthoniobacteraceae]_g__Ellin506_s__	0	0	0	0	0	0	27	18	0	37	0	0		0	0	nd	nd	nd	0	0	0	44	5	0	0
k__Bacteria_p__Verrucomicrobia_c__[Spartobacteria]_o__[Chthoniobacterales]_f__[Chthoniobacteraceae]_g__heteroC45_4W_s__	0	0	0	0	0	0	12	0	26	0	0	0		5	0	nd	nd	nd	3	0	0	0	0	0	0
k__Bacteria_p__Verrucomicrobia_c__[Spartobacteria]_o__[Chthoniobacterales]_f__[Chthoniobacteraceae]_g__OR59_s__	0	0	24	0	15	0	21	0	0	0	0	0		0	0	nd	nd	nd	0	0	0	0	0	0	0
k__Bacteria_p__Verrucomicrobia_c__[Spartobacteria]_o__[Chthoniobacterales]_f__[Chthoniobacteraceae]_NA_NA	0	0	0	0	2	18	0	0	0	10	0	0		20	0	nd	nd	nd	0	0	0	29	0	0	15
k__Bacteria_p__Verrucomicrobia_c__Opitutae_NA_NA_NA_NA	0	0	0	0	0	0	0	0	40	0	0	0		0	0	nd	nd	nd	0	0	0	18	0	0	0
k__Bacteria_p__Verrucomicrobia_c__Opitutae_o__[Cerasicoccales]_f__[Cerasicoccaceae]_g___s__	0	10	37	18	0	9	18	51	52	57	0	18		0	0	nd	nd	nd	0	0	0	8	3	0	5
k__Bacteria_p__Verrucomicrobia_c__Opitutae_o__Opitutales_f__Opitutaceae_g___s__	0	10	3	0	47	13	33	0	51	22	0	11		21	0	nd	nd	nd	0	0	14	33	0	28	146
k__Bacteria_p__Verrucomicrobia_c__Opitutae_o__Opitutales_f__Opitutaceae_g__Opitutus_s__	0	0	0	0	0	0	0	0	47	0	12	0		9	0	nd	nd	nd	0	0	0	0	6	0	34
k__Bacteria_p__Verrucomicrobia_c__Verruco5_NA_NA_NA_NA	0	0	0	0	6	0	6	0	0	0	0	18		0	0	nd	nd	nd	0	0	0	0	0	0	0
k__Bacteria_p__Verrucomicrobia_c__Verruco5_o__LD1PB3_f___g___s__	0	6	0	2	9	57	0	0	0	28	18	22		0	0	nd	nd	nd	0	0	0	0	0	0	0
k__Bacteria_p__Verrucomicrobia_c__Verruco5_o__WCHB141_f___g___s__	0	13	70	22	28	49	30	0	0	48	0	18		5	0	nd	nd	nd	0	0	0	0	0	0	0
k__Bacteria_p__Verrucomicrobia_c__Verruco5_o__WCHB141_f__RFP12_g___s__	0	0	0	0	0	38	0	0	0	21	0	0		0	0	nd	nd	nd	0	0	0	0	0	0	0
k__Bacteria_p__Verrucomicrobia_c__Verrucomicrobiae_o__Verrucomicrobiales_f___g___s__	0	0	0	0	0	0	0	0	0	0	0	0		0	0	nd	nd	nd	0	0	0	0	0	0	0
k__Bacteria_p__Verrucomicrobia_c__Verrucomicrobiae_o__Verrucomicrobiales_f__Verrucomicrobiaceae_g___s__	0	136	178	152	84	100	315	8	161	208	82	340		373	3	nd	nd	nd	2	159	20	172	134	270	466
k__Bacteria_p__Verrucomicrobia_c__Verrucomicrobiae_o__Verrucomicrobiales_f__Verrucomicrobiaceae_g__Luteolibacter_s__	0	0	0	4	0	0	0	0	24	0	7	0		0	0	nd	nd	nd	0	0	0	16	0	0	0
k__Bacteria_p__Verrucomicrobia_c__Verrucomicrobiae_o__Verrucomicrobiales_f__Verrucomicrobiaceae_g__Prosthecobacter_s__	0	0	0	79	37	113	84	26	207	89	130	222		112	66	nd	nd	nd	137	23	0	109	49	33	235
k__Bacteria_p__Verrucomicrobia_c__Verrucomicrobiae_o__Verrucomicrobiales_f__Verrucomicrobiaceae_g__Prosthecobacter_s__debontii	0	0	36	69	62	0	28	0	0	17	8	0		0	0	nd	nd	nd	0	78	0	131	9	44	21
k__Bacteria_p__Verrucomicrobia_c__Verrucomicrobiae_o__Verrucomicrobiales_f__Verrucomicrobiaceae_g__Verrucomicrobium_s__	0	0	0	0	0	0	0	0	0	58	4	0		0	0	nd	nd	nd	0	0	0	15	4	0	0
k__Bacteria_p__Verrucomicrobia_c__Verrucomicrobiae_o__Verrucomicrobiales_f__Verrucomicrobiaceae_NA_NA	0	0	0	34	0	0	47	0	0	7	29	0		0	0	nd	nd	nd	0	0	0	4	0	0	7
k__Bacteria_p__Verrucomicrobia_NA_NA_NA_NA_NA	0	0	20	27	22	19	29	0	0	19	8	32		27	0	nd	nd	nd	0	14	0	21	8	34	19
k__Bacteria_p__WPS2_c___o___f___g___s__	17	0	0	0	6	0	0	0	15	30	0	0		14	0	nd	nd	nd	0	0	0	0	0	0	0
k__Bacteria_p__WS2_c__SHA109_o___f___g___s__	0	0	0	0	0	0	9	0	0	0	0	0		0	0	nd	nd	nd	0	0	0	0	0	0	0
k__Bacteria_p__WS3_c__PRR12_o__GN03_f__KSB4_g___s__	0	0	0	0	0	0	0	0	0	0	2	0		0	0	nd	nd	nd	0	0	0	0	0	0	0
k__Bacteria_p__WS3_c__PRR12_o__LD1PA13_f___g___s__	0	0	0	0	7	0	0	0	0	3	0	0		35	0	nd	nd	nd	0	0	0	0	0	0	0
k__Bacteria_p__WS3_c__PRR12_o__Sediment1_f___g___s__	0	0	67	0	10	3	47	49	0	77	11	0		6	0	nd	nd	nd	0	0	0	0	0	0	0
k__Bacteria_p__WS3_c__PRR12_o__Sediment1_f__CV106_g___s__	2	0	0	0	0	9	0	0	0	0	0	0		0	0	nd	nd	nd	0	0	0	0	0	0	0
k__Bacteria_p__WS3_c__PRR12_o__Sediment1_f__PRR10_g___s__	9	5	23	0	70	34	30	0	88	287	0	0		20	0	nd	nd	nd	0	0	0	0	0	0	0
k__Bacteria_p__WS3_c__PRR12_o__wb1_H11_f___g___s__	0	0	0	0	0	0	0	0	0	8	0	0		0	0	nd	nd	nd	0	0	0	0	0	0	0
k__Bacteria_p__WS5_c___o___f___g___s__	0	0	0	2	14	6	0	21	32	17	0	0		0	0	nd	nd	nd	0	0	0	0	0	0	0
k__Bacteria_p__ZB3_c___o___f___g___s__	0	0	0	0	0	2	0	0	0	0	0	0		0	0	nd	nd	nd	0	0	0	0	0	0	0
k__Bacteria_p__ZB3_c__BS119_o___f___g___s__	0	0	0	0	7	0	6	0	38	0	5	0		0	0	nd	nd	nd	0	0	0	5	4	0	0
k__Bacteria_p__ZB3_NA_NA_NA_NA_NA	0	7	0	0	0	0	0	0	0	0	0	0		0	0	nd	nd	nd	0	0	0	0	0	0	0
NA_NA_NA_NA_NA_NA_NA	0	0	0	0	0	0	0	0	0	11	0	6		3	0	nd	nd	nd	0	0	0	0	0	44	0
