# Supplementary material for: Longitudinal metabarcode analysis of karst bacterioplankton microbiomes provide evidence of epikarst to cave transport and community succession
Source: PeerJ. 2021 Mar 8;9:e10757. doi: 10.7717/peerj.10757 (PMC7950216; doi:10.7717/peerj.10757)
Supplement: Supplemental Information 7 [file peerj-09-10757-s007.xlsx]

## Sheet: Sheet1
Table 1: Pair wise Kruskal-Wallis comparisons, based on Faith's biodiversity
	Panel Cave - Sink Hole	Panel Cave - Pool	Surface - Stock Creek	All Cave Samples
Panel Cave - Pool	1.22 (0.269)	-	-	-
Surface - Stock Creek	2.93 (0.08)	0.05 (0.823)	-	-
Surface - Waterfall	0.81 (.368)	4.71 (0.03)	8.35 (0.003)	-
All Surface Samples	-	-	-	0.39 (0.533)
p-values in parentheses
