# Supplementary material for: Longitudinal metabarcode analysis of karst bacterioplankton microbiomes provide evidence of epikarst to cave transport and community succession
Source: PeerJ. 2021 Mar 8;9:e10757. doi: 10.7717/peerj.10757 (PMC7950216; doi:10.7717/peerj.10757)
Supplement: Supplemental Information 9 [file peerj-09-10757-s009.xlsx]

## Sheet: Sheet1
Supplemental Table 5 : Bacterioplankton Class Distribution within the Primary Cave Phyla
phylum	class	sinkhole	pool
		Number of ASVs
Proteobacteria	Alphaproteobacteria	93	112
	Betaproteobacteria	57	67
	Deltaproteobacteria	54	46
	Gammaproteobacteria	84	100
	Zetaproteobacteria	2	2
	Epsilonproteobacteria	1	1
	TA18	1	3
Bacteroidetes	Cytophagia	14	12
	[Saprospirae]	9	11
	Sphingobacteriia	6	8
	Flavobacteriia	12	21
	Bacteroidia	9	13
	BME43	1	1
	VC2	1	1
	[Rhodothermi]	1	1
Actinobacteria	Actinobacteria	66	73
	Acidimicrobiia	10	9
	Thermoleophilia	11	8
	MBA2108	1	2
	Nitriliruptoria	2	1
	OPB41	1	1
	Rubrobacteria	1	1
	KISTJJY010	1	0
Planctomycetes	Planctomycetia	11	13
	Phycisphaerae	10	5
	OM190	3	3
	C6	2	1
	BD711	1	1
	Pla4	1	1
	vadinHA49	0	1
	Pla3	1	0
	ODP123	2	0
	028H05PBNP5	1	0
	[Brocadiae]	1	0
Chloroflexi	Anaerolineae	27	11
	Chloroflexi	7	5
	Ellin6529	1	1
	S085	1	1
	SAR202	1	1
	Thermomicrobia	2	2
	TK10	6	2
	TK17	2	2
	C0119	1	0
	Dehalococcoidetes	1	0
	Ktedonobacteria	2	0
	SHA26	1	0
	GittGS136	1	0
Acidobacteria	Acidobacteria6	6	5
	[Chloracidobacteria]	7	5
	Acidobacteriia	1	2
	DA052	2	2
	EC1113	1	1
	iii18	3	1
	Sva0725	1	1
	Acidobacteria5	1	1
	Solibacteres	6	0
	ATs54	1	0
	BPC102	1	0
	PAUC37f	1	0
	RB25	1	0
	S035	1	0
	TM1	1	0
