# Supplementary material for: Longitudinal metabarcode analysis of karst bacterioplankton microbiomes provide evidence of epikarst to cave transport and community succession
Source: PeerJ. 2021 Mar 8;9:e10757. doi: 10.7717/peerj.10757 (PMC7950216; doi:10.7717/peerj.10757)
Supplement: Supplemental Information 11 [file peerj-09-10757-s011.xlsx]

## Sheet: MetaData
Metadata
	T	DO	pH	Cond	Cl	NO3	NH3		site	date	replicate	environment
PP	12.6	8.81	7.93	527	24.8	0.8	1.5		PP	2018-05-29	A	cave		PP = Panel Cave Pool
PP	12.5	8.81	8.04	398	1.7	0.4	0.1		PP	2018-05-29	B	cave		PSH = Panel Cave Sinkhole
PP	12.5	8.81	8.09	389	3.8	0.6	0.2		PP	2018-05-29	C	cave		SC = Stock Creek
PP	12.3	8.8	8.06	497.4	16.6	0.4	0.5		PP	2018-06-28	A	cave		WF = Waterfall
PP	12.3	9.12	8.08	427.8	2.3	0.5	0.1		PP	2018-06-28	B	cave
PP	12.5	9.25	8.09	428.4	2.8	0.4	0.1		PP	2018-06-28	C	cave
PP	12.8	10.37	8.01	449.9	2.9	1.2	0.5		PP	2018-07-27	A	cave
PP	12.8	10.6	8.07	418.7	1.9	1	0.2		PP	2018-07-27	B	cave
PP	12.6	13.36	8	418.5	1.8	0.8	0.5		PP	2018-07-27	C	cave
PP	12.9	9	8.1	466	2.1	0.6	0		PP	2018-08-30	A	cave
PP	12.4	8.74	8.26	457	1.9	0.6	0		PP	2018-08-30	B	cave
PP	12.6	8.9	8.33	458	2	0.6	0		PP	2018-08-30	C	cave
PP	12.5	8.9	8.35	460	3.5	0.6	0.1		PP	2018-09-30	A	cave
PP	12.7	8.5	8.31	462	2.8	0.4	0		PP	2018-09-30	B	cave
PP	12.6	8.9	8.32	460	2.1	0.4	0		PP	2018-09-30	C	cave
PP	14	8.77	8.18	419.3	2.8	1.2	0.1		PP	2018-11-01	A	cave
PP	13.5	8.76	8.3	412.6	3	0.9	0		PP	2018-11-01	B	cave
PP	13.7	8.76	8.2	437	4.3	0.9	0.1		PP	2018-11-01	C	cave
PP	12.8	8.93	8.14	487.6	0.2	5.6	0		PP	2018-11-29	A	cave
PP	13	8.98	8.25	418.2	0.4	4.7	0		PP	2018-11-29	B	cave
PP	12.9	8.94	8.27	419.1	0.4	9.3	0		PP	2018-11-29	C	cave
PP	12.8	8.86	8.08	468	1.9	1	0		PP	2019-01-03	A	cave
PP	12.8	8.88	8.1	472	1.5	0.6	0		PP	2019-01-03	B	cave
PP	12.8	8.83	8.07	515	3.8	0.7	0		PP	2019-01-03	C	cave
PP	12.1	9.01	8.09	491.4	6	0.8	0		PP	2019-02-02	A	cave
PP	12.2	9.02	8.18	480.6	4.8	0.7	0		PP	2019-02-02	B	cave
PP	12.2	8.96	8.17	483.9	5.4	0.5	0		PP	2019-02-02	C	cave
PP	12.4	8.9	8.1	438	5.9	1.6	0		PP	2019-03-02	A	cave
PP	12.4	8.78	8.06	440	4.3	1.3	0		PP	2019-03-02	B	cave
PP	12.6	8.8	8.11	466	3.1	1.2	0		PP	2019-03-02	C	cave
PP	12.1	10.8	8.05	466	8.2	0.7	0		PP	2019-04-07	A	cave
PP	12.6	9	8.13	437	5	0.5	0		PP	2019-04-07	B	cave
PP	12.6	8.9	8.18	432	5	0.7	0		PP	2019-04-07	C	cave
PP	12.3	8.54	8.08	444	4.8	0.6	0		PP	2019-05-05	A	cave
PP	12.3	8.6	8.08	444	4.4	0.7	0		PP	2019-05-05	B	cave
PP	12.2	8.68	8.11	472	4.9	0.7	0		PP	2019-05-05	C	cave
PSH	14.9	8.66	8.23	275	6.6	0.7	0.7		PSH	2018-05-29	A	cave
PSH	14.8	8.65	8.34	297	2.6	0.7	0.3		PSH	2018-05-29	B	cave
PSH	14.7	8.55	8.41	273	2.1	0.7	0.2		PSH	2018-05-29	C	cave
PSH	13.5	8.68	8.25	335.2	2	0.9	0.1		PSH	2018-06-28	A	cave
PSH	15.5	8.4	8.32	332.9	2	0.3	0.1		PSH	2018-06-28	B	cave
PSH	15.4	8.01	8.34	331.4	1.9	0.3	0.1		PSH	2018-06-28	C	cave
PSH	15.9	9.3	8.18	345.6	5.3	1.4	0.4		PSH	2018-07-27	A	cave
PSH	15.9	9.73	8.2	338.2	2.3	1.1	0.5		PSH	2018-07-27	B	cave
PSH	16	9.3	8.1	340.3	1.7	1.1	0.6		PSH	2018-07-27	C	cave
PSH	15.7	8.63	8.1	378	2.2	1	0		PSH	2018-08-30	A	cave
PSH	15.9	8.4	8.33	382	1.9	0.9	0		PSH	2018-08-30	B	cave
PSH	15.9	8.5	8.36	388	1.7	0.8	0		PSH	2018-08-30	C	cave
PSH	16.2	8.58	8.33	473	15.6	20.2	0.2		PSH	2018-09-30	A	cave
PSH	15.6	8.4	8.12	420	3.2	1.2	0		PSH	2018-09-30	B	cave
PSH	15.6	8.53	8.22	394	1.9	0.9	0		PSH	2018-09-30	C	cave
PSH	13.5	8.91	8.17	379.1	11.1	1.1	0		PSH	2018-11-01	A	cave
PSH	13.2	8.47	8.46	360	3.3	1	0		PSH	2018-11-01	B	cave
PSH	13.1	8.72	8.43	358.2	2.6	0.7	0		PSH	2018-11-01	C	cave
PSH	9.5	9.79	8.44	358.1	0.2	0.5	0		PSH	2018-11-29	A	cave
PSH	10	9.78	8.42	373	0.6	0.4	0		PSH	2018-11-29	B	cave
PSH	9.4	9.94	8.41	359.7	0.8	0.4	0		PSH	2018-11-29	C	cave
PSH	11.9	9.22	8.29	303	1.8	1.1	0		PSH	2019-01-03	A	cave
PSH	11	9.15	8.3	312	3.3	1	0		PSH	2019-01-03	B	cave
PSH	11.2	9.24	8.33	307	1.9	1.1	0		PSH	2019-01-03	C	cave
PSH	7.9	10.2	8.17	315.5	6.4	1.2	0		PSH	2019-02-02	A	cave
PSH	7.9	10	8.3	314.1	6.3	1.1	0		PSH	2019-02-02	B	cave
PSH	7.9	10	8.3	316.7	5.8	0.9	0		PSH	2019-02-02	C	cave
PSH	10.7	9.2	8.1	315	5.1	1.4	0		PSH	2019-03-02	A	cave
PSH	10.7	9.18	8.2	315	5.1	1.4	0		PSH	2019-03-02	B	cave
PSH	10.8	9.2	8.3	315	4.5	1.4	0		PSH	2019-03-02	C	cave
PSH	11.1	9.09	8.05	301	3.6	0.8	0		PSH	2019-04-07	A	cave
PSH	11.1	8.9	8.07	305	3.2	0.7	0		PSH	2019-04-07	B	cave
PSH	11.1	8.97	8.1	306	3.3	0.5	0		PSH	2019-04-07	C	cave
PSH	13.1	8.2	8.21	305	3.1	1.2	0		PSH	2019-05-05	A	cave
PSH	13.1	9.12	8.26	308	2.7	1.1	0		PSH	2019-05-05	B	cave
PSH	13.1	8.16	8.3	308	4.5	1.2	0		PSH	2019-05-05	C	cave
SC	16.5	8.77	8.04	21	3.6	0.4	0.6		SC	2018-05-29	A	surface
SC	16.4	8.8	7.98	8	4.6	0.4	0.6		SC	2018-05-29	B	surface
SC	16.5	8.85	7.96	9	5.8	0.5	0.5		SC	2018-05-29	C	surface
SC	20.5	8.03	8.23	148.6	2.31	1.4	1		SC	2018-06-28	A	surface
SC	20.2	7.94	8.27	147.1	2.5	0.6	0.1		SC	2018-06-28	B	surface
SC	20.1	8.1	8.24	143.1	3.5	0.6	0.2		SC	2018-06-28	C	surface
SC	22.4	7.9	8.36	203.6	3.5	1.1	0.4		SC	2018-07-27	A	surface
SC	22.4	8.4	8.37	203.8	3.2	1.1	0.3		SC	2018-07-27	B	surface
SC	22.3	7.3	8.36	203.7	3.4	1.1	0.7		SC	2018-07-27	C	surface
SC	24.7	8.03	8.09	325	16.4	1.2	0.3		SC	2018-08-30	A	surface
SC	24.8	7.82	8.16	289	6.1	0.8	0.1		SC	2018-08-30	B	surface
SC	24.9	7.76	8	283	5.9	0.8	0.2		SC	2018-08-30	C	surface
SC	16.3	8.51	7.85	155	4.5	0.6	0.1		SC	2018-09-30	A	surface
SC	16.3	8.54	7.99	140	2	0.6	0.1		SC	2018-09-30	B	surface
SC	16.4	8.47	7.8	140	2	0.4	0		SC	2018-09-30	C	surface
SC	14.1	9.1	8.4	152.4	3.6	0.4	0		SC	2018-11-01	A	surface
SC	13.5	9.1	8.4	154.7	3.8	0.5	0		SC	2018-11-01	B	surface
SC	15.1	9.3	8.3	215.5	4.5	0.6	0		SC	2018-11-01	C	surface
SC	5.5	10.86	8.1	146	1.2	0.8	0.1		SC	2018-11-29	A	surface
SC	5.7	10.51	8.1	166	1.8	0.8	0.1		SC	2018-11-29	B	surface
SC	5.7	10.51	8.1	166	1.8	0.8	0.1		SC	2018-11-29	C	surface
SC	11.9	9.22	8.29	303	1.8	1.1	0		SC	2019-01-03	A	surface
SC	11	9.15	8.3	312	3.3	1	0		SC	2019-01-03	B	surface
SC	11.2	9.24	8.33	307	1.9	1.1	0		SC	2019-01-03	C	surface
SC	4.3	10.3	7.7	172.3	9.2	0.9	0.1		SC	2019-02-02	A	surface
SC	4.4	11	7.86	173	7	1	0.1		SC	2019-02-02	B	surface
SC	4.4	10.1	7.95	168.6	6.2	0.8	0.1		SC	2019-02-02	C	surface
SC	8.1	9.33	7.86	168	13.6	1.3	0.1		SC	2019-03-02	A	surface
SC	7.9	9.6	7.8	283	14.8	1.5	0		SC	2019-03-02	B	surface
SC	8.8	9.3	7.73	147	6.8	1.1	0		SC	2019-03-02	C	surface
SC	12.6	8.55	7.79	143	1.9	0.4	0.1		SC	2019-04-07	A	surface
SC	12.9	8.62	7.67	141	1.5	0.4	0.1		SC	2019-04-07	B	surface
SC	12.8	8.5	7.88	139	1.1	0.5	0		SC	2019-04-07	C	surface
SC	15.4	8.05	8.25	149	5.3	0.8	0		SC	2019-05-05	A	surface
SC	15	8.06	8.3	148	5.4	0.9	0		SC	2019-05-05	B	surface
SC	15	8.07	8.2	149	4.7	0.7	0		SC	2019-05-05	C	surface
WF	19.9	8.94	8.33	311	5.8	0.4	0.7		WF	2018-05-29	A	surface
WF	19.8	8.7	8.52	300	3.2	0.4	0.4		WF	2018-05-29	B	surface
WF	20.1	8.54	8.64	309	3.8	0.5	0.4		WF	2018-05-29	C	surface
WF	22.8	8.35	8.53	352.3	18.5	1.7	0.7		WF	2018-06-28	A	surface
WF	22.8	8.31	8.61	309.1	5.6	1.2	0.3		WF	2018-06-28	B	surface
WF	22.3	8.23	8.53	307.7	2	0.8	0.1		WF	2018-06-28	C	surface
WF	17.3	8.55	8.52	445	6.8	3.4	0.2		WF	2018-09-30	A	surface
WF	17.3	8.63	8.55	411	2.3	2.6	0		WF	2018-09-30	B	surface
WF	14.5	8.7	8.6	326	3.9	2.3	0		WF	2018-11-01	A	surface
WF	14.5	8.7	8.7	364	3	2.2	0		WF	2018-11-01	B	surface
WF	14.5	8.7	8.8	367	3.2	2.1	0		WF	2018-11-01	C	surface
WF	2.9	11.55	8.58	494	1.6	0.14	0.1		WF	2018-11-29	A	surface
WF	2.8	11.48	8.6	468.4	0.8	0.16	0		WF	2018-11-29	B	surface
WF	2.9	11.44	8.53	467.6	0.9	1.4	0		WF	2018-11-29	C	surface
WF	9.8	9.4	8.49	334	17.3	1.8	0.2		WF	2019-01-03	A	surface
WF	9.4	9.42	8.44	278	3.8	1.4	0.1		WF	2019-01-03	B	surface
WF	9.7	9.4	8.42	273	2.1	1.1	0		WF	2019-01-03	C	surface
WF	2.4	11.17	8.23	296	7.1	1.6	0		WF	2019-02-02	A	surface
WF	2.8	10.7	8.12	297	6.6	0.8	0		WF	2019-02-02	B	surface
WF	2	11.5	8.21	289	6.4	0.7	0		WF	2019-02-02	C	surface
WF	8.1	9.1	7.5	255	8.1	1.5	0		WF	2019-03-02	A	surface
WF	7.9	9.4	7.69	259	5.5	1.4	0		WF	2019-03-02	B	surface
WF	8.1	9.3	7.78	249	5	1.4	0		WF	2019-03-02	C	surface
WF	11.3	8.5	8.09	305	2.8	0.9	0		WF	2019-04-07	A	surface
WF	11.7	8.7	8.03	300	2.5	0.6	0		WF	2019-04-07	B	surface
WF	11.5	8.65	7.83	303	2.4	0.6	0		WF	2019-04-07	C	surface
WF	14.6	7.9	8.32	286	2.7	1.1	0		WF	2019-05-05	A	surface
WF	14.6	8.1	8.36	289	3.5	1.1	0		WF	2019-05-05	B	surface
WF	14.7	8.1	8.38	288	3.1	1.3	0		WF	2019-05-05	C	surface
